# Supplementary material for: Small RNA profiling of Xenopus embryos reveals novel miRNAs and a new class of small RNAs derived from intronic transposable elements
Source: HighWire-hosted journal article supplement (doi:10.1101/gr.144469.112), 2013-09-24
Supplement: Supplemental_File_1.xlsx [file Supplemental_File_1.xlsx]

## Sheet: Notes
miRNAs
miRbase 14 microRNA entries are listed with the corresponding number of raw reads and normalized reads sequenced in each small RNA library.
Raw reads are trimmed of adaptor sequences and normalized by linear scaling (multiply by: greatest number of genomic alignments in any sample / number of genomic alignments in this sample).
miRNAs listed pass a filter of a minimum of 10 normalized reads in at least one small RNA library, 22-23 nt length and a perfect match to a miRbase miRNA sequence.
* indicates sequences that differ from another one by the addition of 3' or 5' nucleotides (in red)
miRNAs already identified in Xenopus tropicalis are underlined

## Sheet: miRNAs
miRNA_name	Sequence	Stage8_raw	Stage8_normalized	Stage10_raw	Stage10_normalized	Stage18_raw	Stage18_normalized	Stage10AnHem_raw	Stage10AnHem_normalized	Stage10VegHem_raw	Stage10VegHem_normalized
hsa-miR-423-5p	TGAGGGGCAGAGAGCGAGACTTT	423	423	1477	1482	614	695	1208	1347	338	417
xtr-let-7c	TGAGGTAGTAGGTTGTATGGTT	267	267	641	643	389	440	666	743	124	153
xtr-let-7f	TGAGGTAGTAGATTGTATAGTT	255	255	782	785	718	812	766	854	208	257
hsa-let-7b	TGAGGTAGTAGGTTGTGTGGTT	129	129	220	221	234	265	412	460	99	122
hsa-let-7d*	AGAGGTAGTAGGTTGCATAGTT	70	70	214	215	136	154	175	195	59	73
mdo-let-7d*	AGAGGTAGTAGGTTGCATAGT	2	2	15	15	6	7	11	12	0	0
bta-let-7e*	TGAGGTAGGAGGTTGTATAGT	31	31	108	108	43	49	63	70	23	28
hsa-let-7e*	TGAGGTAGGAGGTTGTATAGTT	31	31	62	62	40	45	76	85	28	35
bfl-let-7-1-as	AACTATACAACCTACTACCTCA	25	25	86	86	75	85	82	91	42	52
xtr-let-7a*	TGAGGTAGTAGGTTGTATAGTT	21	21	52	52	55	62	70	78	26	32
dme-let-7*	TGAGGTAGTAGGTTGTATAGT	15	15	51	51	42	48	47	52	18	22
mmu-let-7g	TGAGGTAGTAGTTTGTACAGTT	12	12	4	4	10	11	33	37	5	6
xtr-let-7e	TGAGGTAGTAGGTTGTTTAGTT	0	0	0	0	15	17	0	0	1	1
xtr-miR-148a	TCAGTGCACTACAGAACTTTGT	234	234	189	190	174	197	424	473	114	141
xtr-miR-101a*	TACAGTACTGTGATAACTGAAG	226	226	189	190	727	822	341	380	181	223
gga-miR-101*	GTACAGTACTGTGATAACTGAA	34	34	65	65	100	113	81	90	15	19
cfa-miR-101*	TACAGTACTGTGATAACTGA	17	17	12	12	29	33	38	42	13	16
hsa-miR-101*	TACAGTACTGTGATAACTGAA	4	4	49	49	6	7	15	17	1	1
bmo-miR-184*	ACTGGACGGAGAACTGATAAGGGC	206	206	992	996	495	560	2108	2351	187	231
dme-miR-184*	TGGACGGAGAACTGATAAGGGC	175	175	1014	1018	449	508	2129	2374	153	189
aga-miR-184*	TGGACGGAGAACTGATAAGGG	0	0	6	6	4	5	10	11	0	0
xtr-miR-184	TGGACGGAGAACTGATAAGGCT	44	44	120	120	319	361	86	96	26	32
gga-miR-30a-3p	CTTTCAGTCGGATGTTTGCAGC	124	124	428	430	251	284	435	485	53	65
xtr-miR-30a-3p	CTTTCAGTCAGATGTTTGCAGC	1	1	3	3	10	11	1	1	0	0
cfa-miR-378	ACTGGACTTGGAGTCAGAAGGC	173	173	594	596	444	502	537	599	155	191
xtr-miR-10a*	TACCCTGTAGATCCGAATTTGTG	161	161	521	523	371	420	502	560	99	122
dre-miR-10a*	TACCCTGTAGATCCGAATTTGT	135	135	445	447	235	266	467	521	98	121
xtr-miR-10b*	TACCCTGTAGAACCGAATTTGT	99	99	342	343	965	1092	307	342	73	90
mmu-miR-10b*	TACCCTGTAGAACCGAATTTGTG	134	134	403	404	2526	2857	392	437	86	106
mdo-miR-10b*	ATACCCTGTAGAACCGAATTTGT	96	96	363	364	1065	1205	315	351	63	78
spu-miR-10	AACCCTGTAGATCCGAATTTGTG	7	7	6	6	29	33	24	27	8	10
xtr-miR-10c	CACCCTGTAGAATCGAATTTGT	0	0	0	0	68	77	0	0	0	0
dre-miR-10c	TACCCTGTAGATCCGGATTTGT	0	0	1	1	0	0	10	11	1	1
rno-miR-10a-3p	CAAATTCGTATCTAGGGGAATA	130	130	442	444	2525	2856	417	465	91	112
cel-miR-48	TGAGGTAGGCTCAGTAGATGCGA	115	115	253	254	97	110	226	252	116	143
cel-miR-58	TGAGATCGTTCAGTACGGCAAT	77	77	299	300	145	164	308	344	78	96
cel-miR-65	TATGACACTGAAGCGTAACCGAA	63	63	86	86	96	109	105	117	28	35
cel-miR-64	TATGACACTGAAGCGTTACCGAA	9	9	52	52	9	10	74	83	5	6
bta-miR-140*	TACCACAGGGTAGAACCACGGA	45	45	99	99	200	226	93	104	27	33
cfa-miR-140*	ACCACAGGGTAGAACCACGGA	11	11	51	51	98	111	59	66	14	17
hsa-miR-103-as	TCATAGCCCTGTACAATGCTGCT	45	45	114	114	121	137	70	78	26	32
dme-miR-1	TGGAATGTAAAGAAGTATGGAG	41	41	233	234	131	148	613	684	27	33
mdo-miR-31*	GGAGGCAAGATGTTGGCATAGCTG	41	41	104	104	56	63	108	120	38	47
oan-miR-31*	AGGCAAGATGTTGGCATAGCTGT	6	6	5	5	2	2	23	26	5	6
xtr-miR-31*	AGGCAAGATGTTGGCATAGCTG	5	5	3	3	6	7	23	26	2	2
cfa-miR-31	AGGCAAGATGCTGGCATAGCTGT	11	11	55	55	10	11	25	28	2	2
dpu-miR-31	AGGCAAGATGTCGGCATAGCTGA	2	2	10	10	5	6	1	1	0	0
cfa-miR-363*	AATTGCACGGTATCCATCTGTAA	35	35	32	32	405	458	25	28	25	31
hsa-miR-363*	AATTGCACGGTATCCATCTGTA	3	3	8	8	320	362	3	3	9	11
cel-miR-72	AGGCAAGATGTTGGCATAGCTGA	34	34	113	113	68	77	105	117	41	51
cel-miR-73	TGGCAAGATGTAGGCAGTTCAGT	12	12	52	52	31	35	34	38	4	5
sme-miR-31b	AGGCAAGATGCTGGCATAGCTGA	7	7	20	20	4	5	8	9	2	2
dme-miR-31a	TGGCAAGATGTCGGCATAGCTGA	4	4	41	41	12	14	56	62	7	9
dps-miR-31b	TGGCAAGATGTCGGAATAGCTGA	0	0	0	0	0	0	13	14	0	0
xtr-miR-16c	TAGCAGCACGTAAATACTGGAG	28	28	45	45	663	750	81	90	19	23
hsa-miR-16	TAGCAGCACGTAAATATTGGCG	13	13	19	19	20	23	15	17	5	6
bta-miR-195	TAGCAGCACAGAAATATTGGCA	10	10	2	2	3	3	14	16	0	0
xtr-miR-16b	TAGCAGCACGTAAATATTGGGT	1	1	1	1	101	114	14	16	13	16
hsa-miR-1826	ATTGATCATCGACACTTCGAACGCAAT	24	24	18	18	21	24	66	74	107	132
bfl-miR-2076	AATTGCACTAGAGTGATTTGTT	21	21	40	40	20	23	4	4	5	6
xtr-miR-30b	TGTAAACATCCTACACTCAGCT	18	18	13	13	21	24	12	13	16	20
bta-miR-21	TAGCTTATCAGACTGATGTTGACT	15	15	22	22	22	25	21	23	5	6
gga-miR-146c*	TGAGAACTGAATTCCATGGACTG	13	13	5	5	318	360	27	30	10	12
xtr-miR-146b*	TGAGAACTGAATTCCATGGACT	6	6	4	4	50	57	17	19	12	15
rno-miR-146b	TGAGAACTGAATTCCATAGGCTGT	2	2	10	10	4	5	5	6	2	2
mmu-miR-146a	TGAGAACTGAATTCCATGGGTT	0	0	0	0	0	0	10	11	0	0
dme-miR-312	TATTGCACTTGAGACGGCCTGA	11	11	76	76	43	49	204	228	7	9
mmu-miR-143	TGAGATGAAGCACTGTAGCTC	11	11	33	33	31	35	60	67	29	36
xtr-miR-130a	CAGTGCAATGTTAAAAGGGCAT	11	11	14	14	53	60	13	14	5	6
xtr-miR-130b	CAGTGCAATGATGAAAGGGCAT	7	7	12	12	2110	2387	26	29	18	22
xtr-miR-130c	CAGTGCAATATTAAAAGGGCAT	2	2	0	0	388	439	6	7	2	2
cel-miR-228	AATGGCACTGCATGAATTCACGG	10	10	38	38	82	93	28	31	16	20
xtr-miR-183*	TATGGCACTGGTAGAATTCACTG	3	3	14	14	405	458	19	21	22	27
mmu-miR-183*	TATGGCACTGGTAGAATTCACT	0	0	6	6	101	114	15	17	10	12
dme-miR-263a	GTTAATGGCACTGGAAGAATTCAC	0	0	15	15	7	8	44	49	0	0
hsa-miR-320a	AAAAGCTGGGTTGAGAGGGCGA	10	10	27	27	38	43	35	39	11	14
mmu-miR-466i	ATACACACACACATACACACTA	9	9	35	35	1932	2185	25	28	14	17
mmu-miR-191	CAACGGAATCCCAAAAGCAGCTG	10	10	12	12	5	6	16	18	18	22
hsa-miR-26a*	TTCAAGTAATCCAGGATAGGCT	8	8	28	28	33	37	21	23	5	6
xtr-miR-26*	TTCAAGTAATCCAGGATAGGC	6	6	22	22	36	41	18	20	3	4
mmu-miR-151-3p	CTAGACTGAGGCTCCTTGAGG	8	8	22	22	0	0	6	7	1	1
xtr-miR-24a	TGGCTCAGTTCAGCAGGAACAG	8	8	25	25	15	17	46	51	0	0
bta-miR-29a*	CTAGCACCATCTGAAATCGGTTA	7	7	30	30	5	6	13	14	4	5
hsa-miR-29a*	TAGCACCATCTGAAATCGGTTA	3	3	21	21	7	8	6	7	3	4
cel-miR-227	AGCTTTCGACATGATTCTGAAC	7	7	27	27	11	12	23	26	0	0
cel-miR-35	TCACCGGGTGGAAACTAGCAGT	7	7	31	31	15	17	53	59	1	1
hsa-miR-182*	TTTGGCAATGGTAGAACTCACACT	7	7	12	12	41	46	13	14	3	4
xtr-miR-182*	TTTGGCAATGGTAGAACTCACA	2	2	11	11	40	45	0	0	1	1
eca-miR-182*	TTTGGCAATGGTAGAACTCACACTG	1	1	9	9	34	38	11	12	5	6
mmu-miR-182	TTTGGCAATGGTAGAACTCACACCG	4	4	13	13	36	41	9	10	7	9
xtr-miR-1a*	TGGAATGTAAAGAAGTATGTA	0	0	19	19	910	1029	17	19	1	1
mmu-miR-1*	TGGAATGTAAAGAAGTATGTAT	7	7	12	12	904	1023	8	9	1	1
xla-miR-427*	AAAGTGCTTTCTGTTTTGGGCG	7	7	92	92	88	100	98	109	75	93
xtr-miR-427*	GAAAGTGCTTTCTGTTTTGGGCG	0	0	0	0	12	14	3	3	0	0
xtr-miR-107*	AGCAGCATTGTACAGGGCTATCA	7	7	11	11	111	126	51	57	6	7
cfa-miR-107*	AGCAGCATTGTACAGGGCTAT	5	5	0	0	0	0	26	29	0	0
bta-miR-107*	AGCAGCATTGTACAGGGCTATC	2	2	19	19	27	31	19	21	2	2
mmu-miR-1981	GTAAAGGCTGGGCTTAGACGTGGC	6	6	11	11	0	0	0	0	0	0
xtr-miR-15b	TAGCAGCACATCATGATTTGCA	6	6	4	4	28	32	7	8	4	5
oan-miR-15c*	TAGCAGCACATCATGGTTTGT	1	1	0	0	12	14	1	1	1	1
xtr-miR-15c*	TAGCAGCACATCATGGTTTGTA	0	0	0	0	10	11	1	1	0	0
bta-miR-192	CTGACCTATGAATTGACAGCCAG	5	5	8	8	9	10	2	2	3	4
xtr-miR-192	ATGACCTATGAATTGACAGCC	0	0	0	0	27	31	0	0	0	0
cel-miR-237	TCCCTGAGAATTCTCGAACAGCT	5	5	33	33	18	20	35	39	3	4
mmu-miR-185	TGGAGAGAAAGGCAGTTCCTGA	5	5	18	18	13	15	54	60	1	1
mmu-miR-99b	CACCCGTAGAACCGACCTTGCG	5	5	11	11	11	12	26	29	1	1
xtr-miR-214*	ACAGCAGGCACAGACAGGCAG	0	0	18	18	10	11	0	0	0	0
hsa-miR-214*	ACAGCAGGCACAGACAGGCAGT	4	4	12	12	10	11	9	10	2	2
xtr-miR-19a	TGTGCAAATCTATGCAAAACTGA	4	4	6	6	13	15	0	0	6	7
xtr-miR-19b	TGTGCAAATCCATGCAAAACTGA	1	1	4	4	38	43	0	0	1	1
xtr-miR-22	AAGCTGCCAGTTGAAGAACTGT	4	4	19	19	23	26	8	9	1	1
ame-miR-283	AAATATCAGCTGGTAATTCT	3	3	38	38	16	18	49	55	6	7
xtr-miR-202	AGGGGCATAGGGCATGGGAAAA	3	3	2	2	0	0	9	10	0	0
xtr-miR-206*	TGGAATGTAAGGAAGTGTGTGG	3	3	63	63	18896	21374	12	13	0	0
mdo-miR-206*	TGGAATGTAAGGAAGTGTGTG	0	0	0	0	184	208	0	0	0	0
xtr-miR-20b	CAAAGTGCTCATAGTGCAGGTAG	3	3	1	1	65	74	6	7	3	4
xtr-miR-20a	TAAAGTGCTTATAGTGCAGGTAG	0	0	0	0	19	21	4	4	2	2
bta-miR-200a*	TAACACTGTCTGGTAACGATGTT	2	2	0	0	38	43	6	7	0	0
xtr-miR-200a*	TAACACTGTCTGGTAACGATGT	2	2	0	0	35	40	0	0	0	0
mmu-miR-200b*	TAATACTGCCTGGTAATGATGA	0	0	0	0	43	49	0	0	0	0
xtr-miR-200b*	TAATACTGCCTGGTAATGATGAT	0	0	0	0	58	66	0	0	0	0
bta-miR-342	TCTCACACAGAAATCGCACCCATCT	2	2	0	0	14	16	0	0	0	0
xtr-miR-181a	AACATTCAACGCTGTCGGTGAGT	2	2	1	1	3	3	10	11	3	4
xtr-miR-363-5p	CGGGTGGATCACGATGCAATTT	2	2	0	0	39	44	3	3	7	9
xtr-miR-92b	TATTGCACTCGTCCCGGCCTC	2	2	0	0	21	24	5	6	1	1
xtr-miR-25	CATTGCACTTGTCTCGGTCTGA	1	1	12	12	0	0	17	19	0	0
hsa-miR-92a*	TATTGCACTTGTCCCGGCCTGT	0	0	0	0	19	21	11	12	2	2
xtr-miR-92a*	TATTGCACTTGTCCCGGCCTG	0	0	0	0	20	23	9	10	0	0
bta-miR-22-5p	AGTTCTTCAGTGGCAAGCTTTA	1	1	0	0	22	25	5	6	0	0
cel-miR-34	AGGCAGTGTGGTTAGCTGGTTG	1	1	0	0	19	21	0	0	7	9
xtr-miR-34b	CAGGCAGTGTAGTTAGCTGATTG	0	0	0	0	58	66	0	0	0	0
cel-miR-37	TCACCGGGTGAACACTTGCAGT	1	1	17	17	5	6	23	26	2	2
cfa-miR-1839	AAGGTAGATAGAACAGGTCTTG	1	1	26	26	20	23	0	0	0	0
xtr-miR-9b	TCTTTGGTTACCTAGCTGTATGA	1	1	14	14	15	17	37	41	6	7
bfl-miR-281	TGTCATGGAGTTGCTCTCTTTT	0	0	0	0	12	14	0	0	0	0
cel-miR-124*	TAAGGCACGCGGTGAATGCCA	0	0	0	0	22	25	0	0	0	0
dme-miR-124*	TAAGGCACGCGGTGAATGCCAAG	0	0	0	0	12	14	0	0	0	0
dre-miR-124*	TAAGGCACGCGGTGAATGCCAA	0	0	0	0	18	20	0	0	0	0
cel-miR-51	TACCCGTAGCTCCTATCCATGTT	0	0	12	12	0	0	0	0	2	2
cel-miR-74	TGGCAAGAAATGGCAGTCTACA	0	0	8	8	9	10	0	0	0	0
cel-miR-81	TGAGATCATCGTGAAAGCTAGT	0	0	9	9	6	7	13	14	4	5
cfa-miR-17	ACTGCAGTGAAGGCACTTGTAG	0	0	0	0	10	11	9	10	5	6
cfa-miR-200b	CATCTTACTGGGCAGCATTGGA	0	0	0	0	472	534	32	36	2	2
dme-miR-14	TCAGTCTTTTTCTCTCTCCTA	0	0	0	0	0	0	12	13	0	0
dme-miR-219	TGATTGTCCAAACGCAATTCTTG	0	0	0	0	9	10	0	0	0	0
dme-miR-279	TGACTAGATCCACACTCATTAA	0	0	15	15	0	0	0	0	5	6
dme-miR-310	TATTGCACACTTCCCGGCCTTT	0	0	0	0	0	0	9	10	0	0
dme-miR-311	TATTGCACATTCACCGGCCTGA	0	0	0	0	0	0	9	10	0	0
dme-miR-317	TGAACACAGCTGGTGGTATCCAGT	0	0	0	0	5	6	12	13	1	1
dps-miR-317	TGAACACAGCTGGTGGTATCCAAT	0	0	1	1	8	9	16	18	0	0
dme-miR-8	TAATACTGTCAGGTAAAGATGTC	0	0	0	0	0	0	13	14	0	0
dme-miR-994	CTAAGGAAATAGTAGCCGTGAT	0	0	0	0	0	0	14	16	2	2
dre-miR-23a	ATCACATTGCCAGGGATTTCCA	0	0	2	2	22	25	4	4	0	0
dre-miR-27b	TTCACAGTGGCTAAGTTCTGCA	0	0	12	12	3	3	16	18	1	1
xtr-miR-17-5p*	CAAAGTGCTTACAGTGCAGGTAGT	0	0	1	1	30	34	1	1	1	1
hsa-miR-17*	CAAAGTGCTTACAGTGCAGGTAG	0	0	0	0	29	33	1	1	2	2
hsa-miR-196a	TAGGTAGTTTCATGTTGTTGGG	0	0	2	2	13	15	0	0	0	0
hsa-miR-93	CAAAGTGCTGTTCGTGCAGGTAG	0	0	0	0	14	16	7	8	5	6
xtr-miR-106*	AAAAGTGCTTATAGTGCAGGTAGA	0	0	0	0	31	35	0	0	1	1
mdo-miR-106*	AAAAGTGCTTATAGTGCAGGTAG	0	0	0	0	26	29	2	2	0	0
mmu-miR-139-3p	TGGAGACGCGGCCCTGTTGGAG	0	0	11	11	0	0	8	9	2	2
xtr-miR-429*	TAATACTGTCTGGTAATGCCGT	0	0	0	0	18	20	1	1	0	0
xla-miR-429*	TAATACTGTCTGGTAATGCCG	0	0	0	0	11	12	2	2	0	0
xtr-miR-203	GTGAAATGTTTAGGACCACTTG	0	0	0	0	67	76	7	8	0	0
xtr-miR-367	AATTGCACTGTAGCAATGGTGA	0	0	0	0	110	124	2	2	5	6
xtr-miR-375	TTTGTTCGTTCGGCTCGCGTTA	0	0	0	0	12	14	0	0	0	0
xtr-miR-449	AGGCAGTGTAATGTTAGCTGGT	0	0	0	0	32	36	0	0	0	0
