# Supplementary material for: Small RNA profiling of Xenopus embryos reveals novel miRNAs and a new class of small RNAs derived from intronic transposable elements
Source: HighWire-hosted journal article supplement (doi:10.1101/gr.144469.112), 2013-09-24
Supplement: Supplemental_File_2.xlsx [file Supplemental_File_2.xlsx]

## Sheet: Notes
For each small RNA library, we took the small RNA sequences aligning to intronic regions and 5kb upstream of transcription start sites of the NON-repeat masked genome, JGI version 4.1 (XenTro2).
We then took windows of 100bp, with a step increment of 50bp, and computed the mean nucleotide coverage within each window to define clusters (mean density >30).
Overlapping windows (required to belong to the same intron or upstream region) were merged and mean coverage re-calculated (due to the overlap).
Genomic sequence underlying these cluster windows was extracted from the reference genome and mapped back to the genome using the bwa alignment program (requiring 0 mismatches). The total number of reported alignments was then included.
In order, columns are:
Intron region: genomic locations of the introns containing the cluster
Cluster region: genomic location of the small RNA cluster
Cluster length (nt): The length of the small RNA cluster passing window-scanning threshold density criteria
Mean cluster density: The mean density of the cluster of overlapping small RNAs
Number of clusters in the genome: The number of instances of the small RNA cluster genomic sequence occuring in the genome. 0 indicates that there is at least one 'N' in the genomic sequence.
Gene annotation (RefSeq; Build Oct 4th 2010): name of gene according to RefSeq annotation, followed by genomic strand location (+/-), NM RefSeq identification number, genomic location of the gene and if the small RNA cluster is upstream or intronic.
Note that clusters are sorted first by number of clusters in the genome, then by mean cluster density.

## Sheet: Stage 8 Intron
Intron Region	Cluster Region	Cluster Length (nt)	Mean Cluster Density	Number of clusters in genome	Gene Annotation (RefSeq)
scaffold_1142:3277-41075	scaffold_1142:32477-33477	1001	72.9	0	LOC100145503_NM_001126947_+_scaffold_1142:3190-43499@INTRON_1,
scaffold_1142:24572-34885	scaffold_1142:32472-33472	1001	72.9	0	cables2_NM_001114489_-_scaffold_1142:24444-40556@INTRON_1,
scaffold_238:1069922-1118626	scaffold_238:1104422-1104722	301	52.1	0	btrc_NM_001016386_-_scaffold_238:1014158-1121027@INTRON_12,
scaffold_152:1345331-1349677	scaffold_152:1348781-1348881	101	45.3	0	fer_NM_001016902_-_scaffold_152:1330044-1377914@INTRON_5,
scaffold_135:1214666-1417655	scaffold_135:1299516-1299616	101	43.8	0	chd9_NM_001045586_+_scaffold_135:1214575-1809035@INTRON_1,
scaffold_383:526880-654370	scaffold_383:575030-575230	201	38.2	0	kiaa0895_NM_001114073_-_scaffold_383:120263-654575@INTRON_5,
scaffold_152:1104097-1111514	scaffold_152:1110747-1110897	151	37.7	0	sirt4_NM_001045628_+_scaffold_152:1103851-1507544@INTRON_3,
scaffold_556:584721-671903	scaffold_556:661871-661971	101	37.1	0	LOC100135382_NM_001114048_-_scaffold_556:572093-672150@INTRON_4,
scaffold_79:1772801-2156564	scaffold_79:1837451-1837651	201	36.4	0	slc39a3_NM_001102697_+_scaffold_79:680766-2284175@INTRON_13,
scaffold_1180:55105-67788	scaffold_1180:59105-59205	101	36.4	0	kcnt2_NM_001170513_+_scaffold_1180:54922-118790@INTRON_1,
scaffold_56:3492389-3497078	scaffold_56:3495139-3495239	101	36.2	0	fam126a_NM_001079289_+_scaffold_56:3474990-3525553@INTRON_2,
scaffold_434:675420-681221	scaffold_434:676820-676920	101	34.2	0	reps1_NM_001045730_-_scaffold_434:505856-760350@INTRON_12,
scaffold_27:3492022-3594384	scaffold_27:3552922-3553022	101	33.8	0	gdpd5_NM_001127121_+_scaffold_27:1776726-3883646@INTRON_10,
scaffold_716:436460-451726	scaffold_716:448410-448510	101	33.5	0	chmp5_NM_001015720_-_scaffold_716:423203-501699@INTRON_2,
scaffold_716:436460-451726	scaffold_716:448410-448510	101	33.5	0	chmp5_NM_001016748_-_scaffold_716:423199-501699@INTRON_2,
scaffold_45:160995-177579	scaffold_45:162745-162845	101	33.1	0	cacna2d1_NM_001097269_+_scaffold_45:19090-313938@INTRON_5,
scaffold_27:3544813-3555219	scaffold_27:3552913-3553013	101	33	0	znf598_NM_001126071_+_scaffold_27:3543869-3564430@INTRON_1,
scaffold_2:2973231-3083363	scaffold_2:3063731-3063881	151	32.9	0	LOC100127543_NM_001112922_-_scaffold_2:2854824-3162318@INTRON_3,
scaffold_152:1336643-1448161	scaffold_152:1348743-1348893	151	31	0	sirt4_NM_001045628_+_scaffold_152:1103851-1507544@INTRON_7,
scaffold_146:1348335-1356485	scaffold_146:1353185-1353335	151	30.8	0	vrk3_NM_001044457_+_scaffold_146:1334063-1378280@INTRON_4,
scaffold_177:407759-686888	scaffold_177:685109-685209	101	30.4	0	gatad1_NM_001170506_-_scaffold_177:407737-1830149@INTRON_1,
scaffold_11:1224751-1226624	scaffold_11:1225451-1225551	101	30.2	0	LOC100127794_NM_001113111_-_scaffold_11:1190912-1226778@INTRON_17,
scaffold_379:327948-338510	scaffold_379:335198-335298	101	30	0	unc93b1_NM_001100253_-_scaffold_379:255521-338606@INTRON_11,
scaffold_917:210144-225902	scaffold_917:219044-219444	401	98.6	1	arhgef10l_NM_001127901_-_scaffold_917:156027-248367@INTRON_19,
scaffold_535:60205-324154	scaffold_535:179355-180005	651	77.9	1	zadh2_NM_001011370_+_scaffold_535:60153-605646@INTRON_1,
scaffold_495:651347-662635	scaffold_495:654097-654247	151	77.8	1	commd1_NM_001122721_+_scaffold_495:651153-697466@INTRON_1,
scaffold_329:1010717-1025595	scaffold_329:1016617-1016767	151	73.1	1	cryl1_NM_001127026_-_scaffold_329:992921-1039446@INTRON_5,
scaffold_6:4127277-4149603	scaffold_6:4144877-4145027	151	70	1	vac14_NM_001142192_+_scaffold_6:4109725-4192899@INTRON_9,
scaffold_6:3927129-4384212	scaffold_6:4144879-4145029	151	70	1	slc39a3_NM_001102697_-_scaffold_6:2781856-5867994@INTRON_9,
scaffold_32:3795084-3835438	scaffold_32:3820984-3821134	151	66.5	1	adam12_NM_001040014_+_scaffold_32:3589463-3881697@INTRON_11,
scaffold_598:137267-145003	scaffold_598:140017-140117	101	65.7	1	med19_NM_001101806_+_scaffold_598:137077-169874@INTRON_1,
scaffold_196:290332-394732	scaffold_196:387032-387182	151	65.1	1	grm7_NM_001113008_+_scaffold_196:289716-556761@INTRON_1,
scaffold_243:237952-243728	scaffold_243:240152-240252	101	64.8	1	gnptab_NM_001097235_+_scaffold_243:225759-269611@INTRON_5,
scaffold_2:3744415-3754881	scaffold_2:3751115-3751215	101	62.5	1	agpat4_NM_001011265_+_scaffold_2:3718035-3759067@INTRON_5,
scaffold_69:935963-938500	scaffold_69:936413-936663	251	61.3	1	cbx6_NM_001016617_+_scaffold_69:924572-939571@INTRON_4,
scaffold_310:851353-860061	scaffold_310:858753-858853	101	61.2	1	cpped1_NM_001016142_-_scaffold_310:821842-860195@INTRON_3,
scaffold_417:559637-569966	scaffold_417:561787-561987	201	58.3	1	oaz2_NM_001113112_-_scaffold_417:550035-570180@INTRON_4,
scaffold_917:210144-225902	scaffold_917:218794-219044	251	57.9	1	arhgef10l_NM_001127901_-_scaffold_917:156027-248367@INTRON_19,
scaffold_248:190002-192407	scaffold_248:190852-191002	151	57.3	1	gpcpd1_NM_001142145_+_scaffold_248:162175-200072@INTRON_17,
scaffold_84:1535072-1618832	scaffold_84:1596522-1596672	151	57	1	cdh2_NM_001127418_+_scaffold_84:1522000-1652506@INTRON_2,
scaffold_729:57478-368440	scaffold_729:295778-295878	101	56.7	1	rab11fip4_NM_001102700_+_scaffold_729:15260-369371@INTRON_3,
scaffold_501:803938-816898	scaffold_501:810788-810938	151	56.5	1	mta1_NM_001011163_-_scaffold_501:781308-828748@INTRON_15,
scaffold_29:2060859-2204052	scaffold_29:2108959-2109059	101	56.3	1	becn1_NM_001033940_-_scaffold_29:2034824-2208501@INTRON_10,
scaffold_220:1703402-1708283	scaffold_220:1706452-1706602	151	56.1	1	prkcz_NM_001100265_-_scaffold_220:1599873-1708643@INTRON_17,
scaffold_246:1635683-1639029	scaffold_246:1638683-1638833	151	55.6	1	rab15_NM_001016372_+_scaffold_246:1614447-1641068@INTRON_6,
scaffold_106:84779-503722	scaffold_106:138779-138879	101	55.5	1	slc39a3_NM_001102697_-_scaffold_106:83848-2455684@INTRON_4,
scaffold_232:1467733-1504098	scaffold_232:1496933-1497083	151	54.9	1	gtdc1_NM_001007983_+_scaffold_232:1425988-1565344@INTRON_4,
scaffold_483:474593-811871	scaffold_483:682993-683143	151	54	1	c16orf57_NM_001127143_+_scaffold_483:474387-811964@INTRON_1,
scaffold_466:462919-517455	scaffold_466:481169-481269	101	53.8	1	tmem11_NM_001016689_-_scaffold_466:462102-517505@INTRON_1,
scaffold_99:1446550-1503872	scaffold_99:1487800-1487900	101	53.2	1	tsnare1_NM_001112923_+_scaffold_99:1366510-1504214@INTRON_9,
scaffold_850:298675-314846	scaffold_850:301475-301625	151	53	1	prkar1b_NM_001079454_+_scaffold_850:294848-318660@INTRON_2,
scaffold_497:257122-308813	scaffold_497:271572-271772	201	52.8	1	c10orf54_NM_001011488_+_scaffold_497:256954-317894@INTRON_1,
scaffold_750:229825-248223	scaffold_750:235825-235925	101	52.8	1	cul3_NM_001015975_-_scaffold_750:211514-248473@INTRON_15,
scaffold_496:743434-746435	scaffold_496:745734-745884	151	52.5	1	ndrg1_NM_001008145_-_scaffold_496:742610-773801@INTRON_1,
scaffold_1142:3277-41075	scaffold_1142:38177-38377	201	51.5	1	LOC100145503_NM_001126947_+_scaffold_1142:3190-43499@INTRON_1,
scaffold_1142:35178-40244	scaffold_1142:38178-38378	201	51.5	1	cables2_NM_001114489_-_scaffold_1142:24444-40556@INTRON_2,
scaffold_529:837368-841752	scaffold_529:840168-840468	301	50.4	1	rnf126_NM_001006734_-_scaffold_529:820829-841946@INTRON_6,
scaffold_769:84173-87234	scaffold_769:86623-86773	151	50.1	1	derl1_NM_001016723_-_scaffold_769:76078-87449@INTRON_7,
scaffold_917:210144-225902	scaffold_917:217494-217644	151	49.1	1	arhgef10l_NM_001127901_-_scaffold_917:156027-248367@INTRON_19,
scaffold_950:174249-181062	scaffold_950:180049-180499	451	49	1	ctr9_NM_001005076_-_scaffold_950:165206-181510@INTRON_19,
scaffold_37:2917615-2921758	scaffold_37:2918915-2919065	151	48.8	1	c15orf41_NM_001016489_+_scaffold_37:2851946-2999220@INTRON_8,
scaffold_291:436482-444932	scaffold_291:442232-442482	251	48	1	dnajb11_NM_203849_-_scaffold_291:409790-496794@INTRON_3,
scaffold_86:2135901-2138466	scaffold_86:2137351-2137501	151	47.2	1	jak2_NM_001097165_-_scaffold_86:2104825-2188600@INTRON_18,
scaffold_67:580546-588871	scaffold_67:585046-585196	151	47	1	b4galnt1_NM_001126696_-_scaffold_67:561404-643222@INTRON_11,
scaffold_228:517760-524087	scaffold_228:522710-522860	151	46.8	1	sec11c_NM_001005129_+_scaffold_228:498518-526156@INTRON_4,
scaffold_106:1680115-2016415	scaffold_106:1887965-1888115	151	46.7	1	slc39a3_NM_001102697_-_scaffold_106:83848-2455684@INTRON_10,
scaffold_7:709771-933535	scaffold_7:910271-910421	151	46.4	1	myo15a_NM_001100245_+_scaffold_7:41322-933681@INTRON_2,
scaffold_159:1528117-1557741	scaffold_159:1536767-1537017	251	46.4	1	gnai2_NM_203919_-_scaffold_159:1512727-1558060@INTRON_7,
scaffold_788:37498-55015	scaffold_788:53098-53248	151	46.2	1	hsd17b13_NM_001011240_+_scaffold_788:37261-65063@INTRON_1,
scaffold_274:747565-788753	scaffold_274:763615-763715	101	46.1	1	myo15a_NM_001100245_-_scaffold_274:633077-789049@INTRON_5,
scaffold_99:2546112-2586847	scaffold_99:2583312-2583412	101	45.7	1	trappc9_NM_001142140_+_scaffold_99:2445087-2719495@INTRON_18,
scaffold_1142:3277-41075	scaffold_1142:37877-38177	301	45.4	1	LOC100145503_NM_001126947_+_scaffold_1142:3190-43499@INTRON_1,
scaffold_1142:35178-40244	scaffold_1142:37878-38178	301	45.4	1	cables2_NM_001114489_-_scaffold_1142:24444-40556@INTRON_2,
scaffold_346:445974-451450	scaffold_346:446774-446924	151	45.3	1	cenpn_NM_001011097_-_scaffold_346:443163-458035@INTRON_3,
scaffold_278:912053-922109	scaffold_278:921303-921453	151	44.9	1	rnf130_NM_001114240_-_scaffold_278:878287-988809@INTRON_6,
scaffold_753:21921-338290	scaffold_753:68521-68621	101	44.8	1	sult1c4_NM_001011489_+_scaffold_753:3319-338385@INTRON_10,
scaffold_383:155023-383367	scaffold_383:306023-306173	151	44.5	1	kiaa0895_NM_001114073_-_scaffold_383:120263-654575@INTRON_2,
scaffold_51:1345990-1489429	scaffold_51:1376340-1376490	151	44.3	1	rbms1_NM_001097163_+_scaffold_51:1345884-1559954@INTRON_1,
scaffold_310:84678-113013	scaffold_310:92228-92328	101	44.2	1	c16orf45_NM_001142078_-_scaffold_310:64664-177421@INTRON_5,
scaffold_409:599075-842329	scaffold_409:611325-611425	101	43.8	1	LOC100492947_NM_001195230_+_scaffold_409:598989-842684@INTRON_2,
scaffold_34:2508570-2509686	scaffold_34:2508870-2509020	151	43.3	1	ppapdc1b_NM_001128006_+_scaffold_34:2503227-2512205@INTRON_7,
scaffold_104:2318438-2441304	scaffold_104:2426588-2426688	101	43.1	1	gatad1_NM_001170506_+_scaffold_104:1889170-2441351@INTRON_12,
scaffold_36:307489-311465	scaffold_36:308239-308389	151	43	1	LOC100145209_NM_001126697_+_scaffold_36:295717-331699@INTRON_9,
scaffold_232:1467733-1504098	scaffold_232:1497083-1497183	101	42.6	1	gtdc1_NM_001007983_+_scaffold_232:1425988-1565344@INTRON_4,
scaffold_2:1340889-1356905	scaffold_2:1348189-1348339	151	42.5	1	rnf216_NM_001016834_-_scaffold_2:1275208-1388272@INTRON_14,
scaffold_19:1020285-1023129	scaffold_19:1022035-1022135	101	42.5	1	ccnc_NM_203826_+_scaffold_19:1010068-1024786@INTRON_10,
scaffold_135:129934-137489	scaffold_135:132834-133084	251	42.5	1	map7d2_NM_001079229_+_scaffold_135:96695-161300@INTRON_3,
scaffold_576:91153-94345	scaffold_576:92003-92153	151	42	1	polr3b_NM_001128049_-_scaffold_576:36983-104720@INTRON_22,
scaffold_7:709771-933535	scaffold_7:910571-910721	151	41.7	1	myo15a_NM_001100245_+_scaffold_7:41322-933681@INTRON_2,
scaffold_143:724197-1045561	scaffold_143:874747-874847	101	41.7	1	myo15a_NM_001100245_-_scaffold_143:88388-1680404@INTRON_5,
scaffold_55:106195-116822	scaffold_55:108545-108645	101	41.6	1	atp1b3_NM_203756_-_scaffold_55:99022-117024@INTRON_6,
scaffold_5:3792938-3871523	scaffold_5:3833688-3833838	151	41.5	1	trio_NM_001129921_+_scaffold_5:3792720-4075738@INTRON_1,
scaffold_45:2147648-2160134	scaffold_45:2150748-2150898	151	41.5	1	reln_NM_001137612_-_scaffold_45:2010419-2256264@INTRON_59,
scaffold_1:5149843-5157433	scaffold_1:5154143-5154243	101	41.4	1	eps15_NM_001126628_-_scaffold_1:5133025-5179773@INTRON_13,
scaffold_49:2111848-2125819	scaffold_49:2122198-2122298	101	41.4	1	tdp1_NM_001045777_+_scaffold_49:2080504-2136466@INTRON_14,
scaffold_45:2544039-2599922	scaffold_45:2580339-2580439	101	41.3	1	srpk3_NM_001102962_-_scaffold_45:2491207-2600208@INTRON_13,
scaffold_67:580546-588871	scaffold_67:587396-587496	101	41.3	1	b4galnt1_NM_001126696_-_scaffold_67:561404-643222@INTRON_11,
scaffold_298:165134-168579	scaffold_298:165284-165384	101	41.1	1	mthfr_NM_001102994_-_scaffold_298:158016-187627@INTRON_6,
scaffold_88:1001893-1009057	scaffold_88:1006543-1006693	151	41	1	LOC100170434_NM_001130208_-_scaffold_88:994366-1009087@INTRON_3,
scaffold_43:2732754-3005984	scaffold_43:3004654-3004754	101	40.8	1	mitf_NM_001100277_-_scaffold_43:2684980-3006141@INTRON_3,
scaffold_163:1548645-2043961	scaffold_163:2018945-2019095	151	40.7	1	spon2_NM_001079092_-_scaffold_163:1547842-2044068@INTRON_1,
scaffold_422:108546-193707	scaffold_422:154796-154896	101	40.7	1	poll_NM_001100246_+_scaffold_422:108459-193789@INTRON_1,
scaffold_45:2544039-2599922	scaffold_45:2579989-2580139	151	40.5	1	srpk3_NM_001102962_-_scaffold_45:2491207-2600208@INTRON_13,
scaffold_474:371345-601733	scaffold_474:551395-551595	201	40.5	1	commd2_NM_001113076_-_scaffold_474:188066-601774@INTRON_3,
scaffold_28:2616895-3006158	scaffold_28:2700045-2700195	151	40.2	1	dpp6_NM_001102992_+_scaffold_28:2616243-3245700@INTRON_1,
scaffold_92:201746-319680	scaffold_92:281846-281996	151	40.2	1	cdkn2d_NM_001079371_-_scaffold_92:201270-320889@INTRON_3,
scaffold_106:1292561-1303894	scaffold_106:1301161-1301311	151	40.1	1	gbp2_NM_001078799_-_scaffold_106:1290822-1305864@INTRON_2,
scaffold_95:2187255-2290652	scaffold_95:2232855-2233005	151	40	1	tmem132d_NM_001113104_+_scaffold_95:2100100-2543069@INTRON_3,
scaffold_106:1680115-2016415	scaffold_106:2011215-2011365	151	39.8	1	slc39a3_NM_001102697_-_scaffold_106:83848-2455684@INTRON_10,
scaffold_161:1414303-1416490	scaffold_161:1416053-1416203	151	39.8	1	LOC100145274_NM_001126753_+_scaffold_161:1413911-1429014@INTRON_2,
scaffold_343:448518-496568	scaffold_343:490318-490418	101	39.8	1	ccni_NM_001005690_+_scaffold_343:432412-503101@INTRON_2,
scaffold_106:919420-1309606	scaffold_106:1301170-1301320	151	39.6	1	slc39a3_NM_001102697_-_scaffold_106:83848-2455684@INTRON_7,
scaffold_30:4108110-4125308	scaffold_30:4115210-4115410	201	39.4	1	imp3_NM_001004848_+_scaffold_30:4088087-4126240@INTRON_3,
scaffold_120:1540113-1567789	scaffold_120:1542913-1543163	251	39.3	1	cdh13_NM_001103078_+_scaffold_120:1104798-1600265@INTRON_10,
scaffold_41:3269845-3283209	scaffold_41:3280645-3280795	151	39.2	1	dcaf6_NM_001079565_-_scaffold_41:3229866-3313374@INTRON_11,
scaffold_79:1772801-2156564	scaffold_79:1953651-1953801	151	39.1	1	slc39a3_NM_001102697_+_scaffold_79:680766-2284175@INTRON_13,
scaffold_716:276701-298877	scaffold_716:279351-279451	101	39.1	1	c9orf5_NM_001102907_-_scaffold_716:152737-299558@INTRON_9,
scaffold_9:2310906-3030103	scaffold_9:2989156-2989306	151	39	1	cadm2_NM_001005713_+_scaffold_9:2310496-3241766@INTRON_1,
scaffold_15:975979-995664	scaffold_15:990629-990779	151	39	1	ypel2_NM_001102689_+_scaffold_15:538211-995952@INTRON_8,
scaffold_106:1858895-1892268	scaffold_106:1887945-1888145	201	38.9	1	rps6ka1_NM_001123459_+_scaffold_106:1858848-1919668@INTRON_1,
scaffold_777:125171-136599	scaffold_777:127071-127271	201	38.9	1	kiaa1797_NM_001016255_-_scaffold_777:116299-137132@INTRON_4,
scaffold_52:3220538-3231146	scaffold_52:3226138-3226738	601	38.8	1	dgkb_NM_001102744_+_scaffold_52:3184081-3450535@INTRON_2,
scaffold_507:246775-247788	scaffold_507:247525-247675	151	38.6	1	fam102a_NM_001097168_-_scaffold_507:238163-268567@INTRON_6,
scaffold_550:460681-462876	scaffold_550:462081-462231	151	38.6	1	rpp30_NM_001016584_-_scaffold_550:457229-481977@INTRON_5,
scaffold_387:563893-588147	scaffold_387:576993-577193	201	38.5	1	ifngr1_NM_001079346_+_scaffold_387:526819-603105@INTRON_3,
scaffold_714:168429-186708	scaffold_714:184029-184179	151	38.5	1	vcl_NM_001097253_-_scaffold_714:77526-187403@INTRON_20,
scaffold_16:1547869-1803167	scaffold_16:1578969-1579069	101	38.4	1	ypel2_NM_001102689_+_scaffold_16:1547739-2300995@INTRON_1,
scaffold_95:1171653-1176780	scaffold_95:1175453-1175553	101	38.4	1	kiaa1468_NM_001127054_+_scaffold_95:1150323-1232953@INTRON_3,
scaffold_140:1174760-1196345	scaffold_140:1177210-1177410	201	38.4	1	tmeff1_NM_001100268_+_scaffold_140:1093531-1225056@INTRON_5,
scaffold_189:1189021-1195351	scaffold_189:1189671-1189921	251	38.4	1	clvs1_NM_001097346_+_scaffold_189:1171996-1208931@INTRON_3,
scaffold_883:148317-238526	scaffold_883:226317-226517	201	38.4	1	MGC69309_NM_001004837_-_scaffold_883:1552-247279@INTRON_3,
scaffold_43:2732754-3005984	scaffold_43:2922804-2922954	151	38.2	1	mitf_NM_001100277_-_scaffold_43:2684980-3006141@INTRON_3,
scaffold_429:76091-111947	scaffold_429:79341-79541	201	38.1	1	sox13_NM_001017004_-_scaffold_429:14899-129409@INTRON_13,
scaffold_1026:150039-190470	scaffold_1026:152089-152189	101	37.9	1	LOC100145501_NM_001126945_-_scaffold_1026:138540-191557@INTRON_10,
scaffold_4:759869-777718	scaffold_4:770969-771169	201	37.8	1	st3gal3_NM_204095_-_scaffold_4:749128-873359@INTRON_3,
scaffold_101:1429460-1434296	scaffold_101:1430910-1431060	151	37.8	1	wibg_NM_001016274_+_scaffold_101:1429401-1436022@INTRON_1,
scaffold_578:491739-563864	scaffold_578:525039-525189	151	37.7	1	LOC733855_NM_001045601_+_scaffold_578:490506-667922@INTRON_2,
scaffold_156:1978012-1981170	scaffold_156:1979812-1979962	151	37.6	1	cwc15_NM_001078733_-_scaffold_156:1973584-1982300@INTRON_5,
scaffold_529:837368-841752	scaffold_529:840018-840118	101	37.6	1	rnf126_NM_001006734_-_scaffold_529:820829-841946@INTRON_6,
scaffold_188:712226-787198	scaffold_188:749076-749176	101	37.5	1	banp_NM_203864_-_scaffold_188:703445-903409@INTRON_2,
scaffold_65:1831410-1935213	scaffold_65:1922710-1922910	201	37.4	1	c16orf45_NM_001142078_-_scaffold_65:1491901-1935285@INTRON_4,
scaffold_115:763332-764598	scaffold_115:763882-764132	251	37.4	1	c6orf167_NM_001128044_+_scaffold_115:728644-770275@INTRON_16,
scaffold_135:96930-128215	scaffold_135:113980-114130	151	37.4	1	map7d2_NM_001079229_+_scaffold_135:96695-161300@INTRON_1,
scaffold_288:1134882-1167955	scaffold_288:1162482-1162632	151	37.4	1	LOC100145527_NM_001126967_-_scaffold_288:1112342-1189439@INTRON_7,
scaffold_841:23272-82437	scaffold_841:82022-82272	251	37.3	1	ralyl_NM_001078745_+_scaffold_841:23180-232688@INTRON_1,
scaffold_35:880734-885378	scaffold_35:883284-883384	101	37.1	1	cask_NM_001016204_+_scaffold_35:738621-911918@INTRON_20,
scaffold_396:890687-892784	scaffold_396:892387-892487	101	37.1	1	syngap1_NM_001134816_+_scaffold_396:883568-940928@INTRON_4,
scaffold_243:237952-243728	scaffold_243:240302-240452	151	37	1	gnptab_NM_001097235_+_scaffold_243:225759-269611@INTRON_5,
scaffold_54:2615370-2620971	scaffold_54:2618220-2618370	151	36.9	1	nek1_NM_001097211_+_scaffold_54:2604934-2662148@INTRON_8,
scaffold_60:3432908-3437124	scaffold_60:3436708-3436808	101	36.9	1	prmt10_NM_001142186_+_scaffold_60:3415240-3437227@INTRON_5,
scaffold_256:1526020-1529810	scaffold_256:1528470-1528670	201	36.9	1	sptlc1_NM_001079574_-_scaffold_256:1493908-1529878@INTRON_14,
scaffold_346:445974-451450	scaffold_346:449324-449424	101	36.9	1	cenpn_NM_001011097_-_scaffold_346:443163-458035@INTRON_3,
scaffold_41:190029-200298	scaffold_41:193079-193279	201	36.7	1	tulp1_NM_001016482_-_scaffold_41:125078-229182@INTRON_10,
scaffold_44:3276171-3380580	scaffold_44:3316771-3316921	151	36.6	1	tpra1_NM_001130334_+_scaffold_44:3253659-3384012@INTRON_11,
scaffold_68:2684851-2714697	scaffold_68:2699501-2699701	201	36.6	1	rtn1_NM_001085350_-_scaffold_68:2677137-2762253@INTRON_6,
scaffold_86:2135901-2138466	scaffold_86:2136751-2136851	101	36.6	1	jak2_NM_001097165_-_scaffold_86:2104825-2188600@INTRON_18,
scaffold_95:1171653-1176780	scaffold_95:1175103-1175253	151	36.6	1	kiaa1468_NM_001127054_+_scaffold_95:1150323-1232953@INTRON_3,
scaffold_539:400714-696958	scaffold_539:476014-476114	101	36.6	1	trac_NM_001007866_+_scaffold_539:367901-704473@INTRON_4,
scaffold_16:1547869-1803167	scaffold_16:1785169-1785419	251	36.5	1	ypel2_NM_001102689_+_scaffold_16:1547739-2300995@INTRON_1,
scaffold_140:327864-363501	scaffold_140:328864-328964	101	36.5	1	gabbr2_NM_001016007_+_scaffold_140:100515-451999@INTRON_8,
scaffold_519:665346-669475	scaffold_519:666796-666896	101	36.5	1	cyp46a1_NM_001079082_+_scaffold_519:646463-672901@INTRON_12,
scaffold_714:145969-168358	scaffold_714:157219-157369	151	36.5	1	vcl_NM_001097253_-_scaffold_714:77526-187403@INTRON_19,
scaffold_2:496380-509798	scaffold_2:498930-499080	151	36.4	1	itgav_NM_001123449_+_scaffold_2:457190-644980@INTRON_4,
scaffold_218:202413-212521	scaffold_218:210213-210313	101	36.4	1	casp10_NM_001015715_-_scaffold_218:191804-225457@INTRON_7,
scaffold_283:645958-649427	scaffold_283:648658-648858	201	36.4	1	atp6v0d1_NM_001017310_-_scaffold_283:638059-708809@INTRON_3,
scaffold_480:58084-72342	scaffold_480:59084-59234	151	36.4	1	snd1_NM_203852_-_scaffold_480:49665-420331@INTRON_4,
scaffold_52:3220538-3231146	scaffold_52:3225888-3226038	151	36.3	1	dgkb_NM_001102744_+_scaffold_52:3184081-3450535@INTRON_2,
scaffold_173:774140-775852	scaffold_173:774790-774940	151	36.3	1	fgfr1op_NM_001016758_+_scaffold_173:742109-778097@INTRON_13,
scaffold_652:470917-478188	scaffold_652:472417-472567	151	36.3	1	zbtb44_NM_001078991_-_scaffold_652:460639-500754@INTRON_3,
scaffold_49:2408633-2411021	scaffold_49:2409083-2409183	101	36.2	1	ttc7b_NM_001097339_-_scaffold_49:2365050-2436346@INTRON_13,
scaffold_49:3250903-3254965	scaffold_49:3252353-3252453	101	36.2	1	c14orf109_NM_001037266_+_scaffold_49:3250831-3256405@INTRON_1,
scaffold_222:670658-787944	scaffold_222:676858-677008	151	36.2	1	begain_NM_001113026_+_scaffold_222:585058-874492@INTRON_3,
scaffold_26:2331699-2339154	scaffold_26:2335899-2336049	151	36.1	1	ube2e2_NM_001126511_-_scaffold_26:2327849-2444852@INTRON_2,
scaffold_26:3167773-3737968	scaffold_26:3605573-3605673	101	36.1	1	c1qtnf4_NM_001011345_-_scaffold_26:2470905-3738113@INTRON_3,
scaffold_106:84779-503722	scaffold_106:358779-358879	101	36.1	1	slc39a3_NM_001102697_-_scaffold_106:83848-2455684@INTRON_4,
scaffold_466:471448-491205	scaffold_466:481148-481298	151	36.1	1	c17orf103_NM_001008089_-_scaffold_466:469816-517507@INTRON_1,
scaffold_143:724197-1045561	scaffold_143:883197-883297	101	36	1	myo15a_NM_001100245_-_scaffold_143:88388-1680404@INTRON_5,
scaffold_291:1081453-1101974	scaffold_291:1097703-1097853	151	36	1	tmeff2_NM_001097223_+_scaffold_291:1081209-1292027@INTRON_1,
scaffold_808:38407-110132	scaffold_808:73757-73857	101	36	1	LOC100127658_NM_001113002_+_scaffold_808:36610-110268@INTRON_2,
scaffold_28:2616895-3006158	scaffold_28:2700195-2700345	151	35.7	1	dpp6_NM_001102992_+_scaffold_28:2616243-3245700@INTRON_1,
scaffold_362:146071-412734	scaffold_362:376621-376721	101	35.6	1	btn2a1_NM_001130216_+_scaffold_362:142052-412801@INTRON_4,
scaffold_966:165787-240888	scaffold_966:199237-199337	101	35.6	1	fastkd3_NM_001142147_+_scaffold_966:71912-241109@INTRON_7,
scaffold_60:3432908-3437124	scaffold_60:3436408-3436558	151	35.5	1	prmt10_NM_001142186_+_scaffold_60:3415240-3437227@INTRON_5,
scaffold_106:1309953-1679816	scaffold_106:1588053-1588153	101	35.5	1	slc39a3_NM_001102697_-_scaffold_106:83848-2455684@INTRON_9,
scaffold_514:486906-488295	scaffold_514:487406-487556	151	35.5	1	fubp1_NM_203962_+_scaffold_514:470399-489724@INTRON_19,
scaffold_966:72041-107857	scaffold_966:74391-74541	151	35.5	1	fastkd3_NM_001142147_+_scaffold_966:71912-241109@INTRON_1,
scaffold_97:506209-512721	scaffold_97:509009-509109	101	35.3	1	wdr7_NM_001097268_-_scaffold_97:326050-536829@INTRON_15,
scaffold_422:108546-193707	scaffold_422:154946-155196	251	35.3	1	poll_NM_001100246_+_scaffold_422:108459-193789@INTRON_1,
scaffold_651:851-29915	scaffold_651:11451-11651	201	35.3	1	dync1i1_NM_001112911_-_scaffold_651:708-155818@INTRON_1,
scaffold_45:1141736-1166284	scaffold_45:1163736-1163836	101	35.2	1	magi2_NM_001100212_+_scaffold_45:995790-1180312@INTRON_2,
scaffold_102:575310-676444	scaffold_102:654560-654710	151	35.2	1	il1rapl2_NM_001078899_+_scaffold_102:295491-705492@INTRON_6,
scaffold_23:2872158-2874466	scaffold_23:2873808-2873958	151	35.1	1	derl2_NM_001016097_-_scaffold_23:2871714-2880732@INTRON_1,
scaffold_83:77103-171208	scaffold_83:104953-105103	151	35.1	1	kiaa0146_NM_001142908_+_scaffold_83:27190-202187@INTRON_8,
scaffold_88:820476-832358	scaffold_88:823226-823326	101	35.1	1	LOC100127659_NM_001113003_-_scaffold_88:819104-840840@INTRON_1,
scaffold_90:1894239-1901213	scaffold_90:1898589-1898689	101	35.1	1	MGC79698_NM_001004872_+_scaffold_90:1827719-1920100@INTRON_11,
scaffold_439:458197-463108	scaffold_439:461897-462047	151	35.1	1	rnf31_NM_001097175_+_scaffold_439:456973-489771@INTRON_2,
scaffold_71:349251-743059	scaffold_71:407251-407401	151	35	1	LOC779492_NM_001134807_-_scaffold_71:349196-795262@INTRON_1,
scaffold_90:93446-289130	scaffold_90:275296-275546	251	35	1	syt4_NM_001171514_-_scaffold_90:93400-289196@INTRON_1,
scaffold_105:2616215-2619010	scaffold_105:2617315-2617415	101	34.7	1	mettl5_NM_001030492_+_scaffold_105:2615859-2624024@INTRON_2,
scaffold_113:2086255-2114052	scaffold_113:2099055-2099155	101	34.7	1	polk_NM_001005705_+_scaffold_113:2086166-2138791@INTRON_1,
scaffold_578:571597-667011	scaffold_578:642447-642547	101	34.7	1	LOC733855_NM_001045601_+_scaffold_578:490506-667922@INTRON_4,
scaffold_71:401656-408862	scaffold_71:407256-407406	151	34.5	1	gemin8_NM_001045567_+_scaffold_71:401509-418141@INTRON_1,
scaffold_79:812233-1375476	scaffold_79:1305983-1306133	151	34.5	1	slc39a3_NM_001102697_+_scaffold_79:680766-2284175@INTRON_2,
scaffold_86:905441-1079654	scaffold_86:1036091-1036191	101	34.5	1	ptprd_NM_001126889_+_scaffold_86:472567-1283803@INTRON_7,
scaffold_637:3963-23704	scaffold_637:11663-11813	151	34.5	1	cyp7b1_NM_001127039_-_scaffold_637:2691-99015@INTRON_2,
scaffold_34:2891058-3302201	scaffold_34:3068808-3069008	201	34.4	1	sirt4_NM_001045628_-_scaffold_34:2890969-3918895@INTRON_1,
scaffold_67:580546-588871	scaffold_67:587546-587746	201	34.4	1	b4galnt1_NM_001126696_-_scaffold_67:561404-643222@INTRON_11,
scaffold_69:1972748-2785795	scaffold_69:2687598-2687748	151	34.4	1	sh2b3_NM_001100247_+_scaffold_69:1972551-2786447@INTRON_1,
scaffold_23:1187538-1188795	scaffold_23:1188288-1188438	151	34.2	1	kiaa1524_NM_001142038_+_scaffold_23:1163024-1191457@INTRON_18,
scaffold_41:148571-157587	scaffold_41:150571-150671	101	34.2	1	tulp1_NM_001016482_-_scaffold_41:125078-229182@INTRON_8,
scaffold_576:598979-647892	scaffold_576:638129-638229	101	34.2	1	uhrf1bp1l_NM_001130247_-_scaffold_576:598486-704443@INTRON_1,
scaffold_104:2318438-2441304	scaffold_104:2426338-2426438	101	34.1	1	gatad1_NM_001170506_+_scaffold_104:1889170-2441351@INTRON_12,
scaffold_280:20743-22103	scaffold_280:21293-21443	151	34.1	1	ptcd3_NM_001078697_+_scaffold_280:20116-34652@INTRON_2,
scaffold_58:1582227-1585103	scaffold_58:1582677-1582827	151	34	1	glrx_NM_001016597_-_scaffold_58:1577198-1585331@INTRON_2,
scaffold_535:269178-769927	scaffold_535:706028-706128	101	34	1	hist2h2ab_NM_001030325_-_scaffold_535:268679-770176@INTRON_1,
scaffold_161:717069-727734	scaffold_161:722569-722869	301	33.9	1	slc48a1_NM_001015946_+_scaffold_161:716812-730688@INTRON_1,
scaffold_520:443865-470913	scaffold_520:451415-451515	101	33.9	1	cdkn2d_NM_001079371_-_scaffold_520:443457-772818@INTRON_2,
scaffold_674:141324-145775	scaffold_674:143674-143824	151	33.9	1	trip13_NM_203897_-_scaffold_674:133140-165885@INTRON_3,
scaffold_383:526880-654370	scaffold_383:574330-574480	151	33.8	1	kiaa0895_NM_001114073_-_scaffold_383:120263-654575@INTRON_5,
scaffold_534:499613-537276	scaffold_534:512063-512163	101	33.8	1	slc7a6os_NM_001044467_+_scaffold_534:491559-537532@INTRON_4,
scaffold_34:3556578-3918839	scaffold_34:3818228-3818378	151	33.7	1	sirt4_NM_001045628_-_scaffold_34:2890969-3918895@INTRON_6,
scaffold_46:2907904-3168175	scaffold_46:2939304-2939454	151	33.7	1	arsd_NM_001015952_+_scaffold_46:2907883-3233990@INTRON_1,
scaffold_103:88126-90199	scaffold_103:88326-88526	201	33.7	1	ccdc33_NM_001126682_+_scaffold_103:72847-100276@INTRON_5,
scaffold_138:278149-285557	scaffold_138:283699-283849	151	33.7	1	ccdc3_NM_001017103_-_scaffold_138:260189-286170@INTRON_2,
scaffold_106:1309953-1679816	scaffold_106:1600203-1600303	101	33.6	1	slc39a3_NM_001102697_-_scaffold_106:83848-2455684@INTRON_9,
scaffold_115:763332-764598	scaffold_115:764182-764332	151	33.6	1	c6orf167_NM_001128044_+_scaffold_115:728644-770275@INTRON_16,
scaffold_264:1000754-1019681	scaffold_264:1007004-1007154	151	33.6	1	ccnyl1_NM_001016919_-_scaffold_264:963136-1019893@INTRON_9,
scaffold_716:276701-298877	scaffold_716:280001-280101	101	33.5	1	c9orf5_NM_001102907_-_scaffold_716:152737-299558@INTRON_9,
scaffold_576:598979-647892	scaffold_576:644229-644329	101	33.3	1	uhrf1bp1l_NM_001130247_-_scaffold_576:598486-704443@INTRON_1,
scaffold_35:2786778-2817920	scaffold_35:2795278-2795428	151	33.2	1	mid1_NM_001006875_+_scaffold_35:2674915-2862582@INTRON_3,
scaffold_85:2259055-2268647	scaffold_85:2262805-2263005	201	33.2	1	tada1_NM_001005070_-_scaffold_85:2255571-2299345@INTRON_2,
scaffold_188:895032-900475	scaffold_188:899432-899682	251	33.2	1	banp_NM_203864_-_scaffold_188:703445-903409@INTRON_10,
scaffold_416:139116-152788	scaffold_416:151466-151616	151	33.2	1	tmem63c_NM_001097199_+_scaffold_416:139054-189200@INTRON_1,
scaffold_8:3677203-3711393	scaffold_8:3684453-3684603	151	33.1	1	pcsk2_NM_001097191_+_scaffold_8:3676804-3764327@INTRON_1,
scaffold_13:3160394-3254301	scaffold_13:3231994-3232194	201	33.1	1	dach1_NM_001078708_+_scaffold_13:3159588-3365066@INTRON_1,
scaffold_106:84779-503722	scaffold_106:141779-141879	101	33.1	1	slc39a3_NM_001102697_-_scaffold_106:83848-2455684@INTRON_4,
scaffold_493:774170-793269	scaffold_493:785470-785570	101	33	1	znf830_NM_001004918_-_scaffold_493:746296-797884@INTRON_6,
scaffold_966:72041-107857	scaffold_966:73141-73241	101	33	1	fastkd3_NM_001142147_+_scaffold_966:71912-241109@INTRON_1,
scaffold_457:119502-129633	scaffold_457:122452-122602	151	32.9	1	LOC100145536_NM_001126973_+_scaffold_457:112188-134185@INTRON_3,
scaffold_9:3173627-3237012	scaffold_9:3186477-3186577	101	32.8	1	cadm2_NM_001005713_+_scaffold_9:2310496-3241766@INTRON_8,
scaffold_106:1587520-1602002	scaffold_106:1600220-1600320	101	32.8	1	ccdc21_NM_001126536_+_scaffold_106:1570291-1602473@INTRON_8,
scaffold_259:1412962-1422945	scaffold_259:1421812-1421912	101	32.8	1	epyc_NM_001005627_-_scaffold_259:1398996-1443140@INTRON_4,
scaffold_13:3304984-3308453	scaffold_13:3308234-3308384	151	32.7	1	dach1_NM_001078708_+_scaffold_13:3159588-3365066@INTRON_4,
scaffold_221:1389617-1396906	scaffold_221:1395817-1395917	101	32.7	1	galk2_NM_001005803_+_scaffold_221:1330600-1406144@INTRON_8,
scaffold_116:2538040-2549554	scaffold_116:2544340-2544440	101	32.6	1	prdm10_NM_001142069_-_scaffold_116:2501635-2549678@INTRON_20,
scaffold_4:4025128-4028968	scaffold_4:4026978-4027078	101	32.5	1	fggy_NM_001126804_+_scaffold_4:3928643-4053351@INTRON_13,
scaffold_573:291154-577850	scaffold_573:486004-486104	101	32.5	1	myo15a_NM_001100245_-_scaffold_573:284514-577897@INTRON_3,
scaffold_800:215561-226423	scaffold_800:221111-221261	151	32.5	1	tcirg1_NM_001016849_+_scaffold_800:209609-280020@INTRON_3,
scaffold_902:106027-167615	scaffold_902:110377-110477	101	32.5	1	mapk10_NM_001114219_+_scaffold_902:79962-243221@INTRON_2,
scaffold_12:4514753-4516476	scaffold_12:4515053-4515253	201	32.4	1	gstt1_NM_001006810_+_scaffold_12:4511587-4517627@INTRON_3,
scaffold_52:2640695-2655915	scaffold_52:2648595-2648795	201	32.4	1	ispd_NM_001016240_+_scaffold_52:2613821-2686967@INTRON_3,
scaffold_113:862408-870407	scaffold_113:868758-868858	101	32.3	1	fcho2_NM_001142071_+_scaffold_113:832210-902166@INTRON_5,
scaffold_154:223573-230661	scaffold_154:224023-224123	101	32.3	1	LOC100145241_NM_001126725_-_scaffold_154:213750-230747@INTRON_21,
scaffold_409:599075-842329	scaffold_409:607375-607475	101	32.3	1	LOC100492947_NM_001195230_+_scaffold_409:598989-842684@INTRON_2,
scaffold_535:269178-769927	scaffold_535:705878-706028	151	32.3	1	hist2h2ab_NM_001030325_-_scaffold_535:268679-770176@INTRON_1,
scaffold_576:91153-94345	scaffold_576:93103-93203	101	32.3	1	polr3b_NM_001128049_-_scaffold_576:36983-104720@INTRON_22,
scaffold_88:820476-832358	scaffold_88:828726-828826	101	32.2	1	LOC100127659_NM_001113003_-_scaffold_88:819104-840840@INTRON_1,
scaffold_106:2016533-2455418	scaffold_106:2193983-2194083	101	32.2	1	slc39a3_NM_001102697_-_scaffold_106:83848-2455684@INTRON_11,
scaffold_111:2030215-2034913	scaffold_111:2031615-2031715	101	32.2	1	adh1c_NM_001030410_-_scaffold_111:2028402-2043638@INTRON_2,
scaffold_8:3677203-3711393	scaffold_8:3681903-3682003	101	32.1	1	pcsk2_NM_001097191_+_scaffold_8:3676804-3764327@INTRON_1,
scaffold_27:2991429-2995392	scaffold_27:2994879-2994979	101	32.1	1	grid2ip_NM_001079145_+_scaffold_27:2958636-2997425@INTRON_16,
scaffold_140:201972-248916	scaffold_140:241822-241972	151	32.1	1	gabbr2_NM_001016007_+_scaffold_140:100515-451999@INTRON_2,
scaffold_143:1524918-1551552	scaffold_143:1535918-1536018	101	32.1	1	slc23a2_NM_001126689_+_scaffold_143:1524834-1582554@INTRON_1,
scaffold_576:598979-647892	scaffold_576:638729-638829	101	32.1	1	uhrf1bp1l_NM_001130247_-_scaffold_576:598486-704443@INTRON_1,
scaffold_29:4088099-4319807	scaffold_29:4184249-4184349	101	32	1	foxf2_NM_001100232_-_scaffold_29:4087833-4319971@INTRON_3,
scaffold_145:1397048-1496103	scaffold_145:1479548-1479648	101	32	1	slc25a21_NM_001017069_+_scaffold_145:1382508-1591907@INTRON_3,
scaffold_457:119502-129633	scaffold_457:120952-121052	101	32	1	LOC100145536_NM_001126973_+_scaffold_457:112188-134185@INTRON_3,
scaffold_63:886435-903872	scaffold_63:891485-891585	101	31.9	1	LOC100036663_NM_001097217_-_scaffold_63:876524-911486@INTRON_7,
scaffold_71:278431-292111	scaffold_71:282331-282481	151	31.9	1	abi3bp_NM_001030520_+_scaffold_71:186237-373235@INTRON_8,
scaffold_143:1142813-1679949	scaffold_143:1497263-1497363	101	31.9	1	myo15a_NM_001100245_-_scaffold_143:88388-1680404@INTRON_8,
scaffold_482:654718-666800	scaffold_482:659818-659968	151	31.9	1	smap1_NM_001126910_+_scaffold_482:638486-733129@INTRON_2,
scaffold_501:803938-816898	scaffold_501:811038-811188	151	31.9	1	mta1_NM_001011163_-_scaffold_501:781308-828748@INTRON_15,
scaffold_503:538221-560588	scaffold_503:547471-547571	101	31.9	1	kif5b_NM_001128654_+_scaffold_503:537919-581611@INTRON_1,
scaffold_89:755112-760157	scaffold_89:756362-756512	151	31.8	1	cfi_NM_001032337_+_scaffold_89:751765-769840@INTRON_2,
scaffold_194:1490974-1503533	scaffold_194:1494424-1494524	101	31.8	1	mybph_NM_001045793_-_scaffold_194:1453097-1532058@INTRON_6,
scaffold_1263:40261-56399	scaffold_1263:54661-54761	101	31.8	1	znf3_NM_001126646_+_scaffold_1263:23010-56888@INTRON_4,
scaffold_739:59948-139476	scaffold_739:68148-68248	101	31.7	1	ptk2b_NM_001011049_+_scaffold_739:59876-140371@INTRON_1,
scaffold_314:185307-190379	scaffold_314:187457-187557	101	31.6	1	nek11_NM_001078968_+_scaffold_314:144151-279483@INTRON_5,
scaffold_423:1032050-1034211	scaffold_423:1033650-1033750	101	31.6	1	gosr1_NM_001015945_-_scaffold_423:1004297-1037711@INTRON_7,
scaffold_441:941124-947283	scaffold_441:945624-945724	101	31.6	1	evc_NM_001102764_+_scaffold_441:940792-991738@INTRON_1,
scaffold_34:3556578-3918839	scaffold_34:3826128-3826228	101	31.5	1	sirt4_NM_001045628_-_scaffold_34:2890969-3918895@INTRON_6,
scaffold_41:201101-229123	scaffold_41:218901-219051	151	31.5	1	tulp1_NM_001016482_-_scaffold_41:125078-229182@INTRON_12,
scaffold_534:467574-473383	scaffold_534:469824-469924	101	31.5	1	prmt7_NM_001017321_-_scaffold_534:402887-489678@INTRON_14,
scaffold_152:1871354-2090181	scaffold_152:1884654-1884754	101	31.4	1	efna5_NM_001016422_+_scaffold_152:1871202-2122865@INTRON_1,
scaffold_331:1185787-1227737	scaffold_331:1190887-1190987	101	31.4	1	LOC100037907_NM_001097340_-_scaffold_331:1172210-1228034@INTRON_6,
scaffold_539:400714-696958	scaffold_539:483864-484064	201	31.4	1	trac_NM_001007866_+_scaffold_539:367901-704473@INTRON_4,
scaffold_35:898663-910616	scaffold_35:907063-907163	101	31.3	1	cask_NM_001016204_+_scaffold_35:738621-911918@INTRON_25,
scaffold_132:282162-303508	scaffold_132:298462-298562	101	31.3	1	dvl3_NM_001123457_+_scaffold_132:265772-333634@INTRON_3,
scaffold_143:1142813-1679949	scaffold_143:1535913-1536013	101	31.3	1	myo15a_NM_001100245_-_scaffold_143:88388-1680404@INTRON_8,
scaffold_218:202413-212521	scaffold_218:211463-211613	151	31.3	1	casp10_NM_001015715_-_scaffold_218:191804-225457@INTRON_7,
scaffold_257:525554-527602	scaffold_257:526804-527004	201	31.3	1	kaz_NM_001097336_+_scaffold_257:426197-528316@INTRON_7,
scaffold_501:803938-816898	scaffold_501:811538-811688	151	31.3	1	mta1_NM_001011163_-_scaffold_501:781308-828748@INTRON_15,
scaffold_539:375001-400706	scaffold_539:387651-387751	101	31.3	1	trac_NM_001007866_+_scaffold_539:367901-704473@INTRON_3,
scaffold_26:2471076-3027687	scaffold_26:2820276-2820376	101	31.2	1	c1qtnf4_NM_001011345_-_scaffold_26:2470905-3738113@INTRON_1,
scaffold_132:282162-303508	scaffold_132:298162-298262	101	31.2	1	dvl3_NM_001123457_+_scaffold_132:265772-333634@INTRON_3,
scaffold_329:1010717-1025595	scaffold_329:1016317-1016467	151	31.2	1	cryl1_NM_001127026_-_scaffold_329:992921-1039446@INTRON_5,
scaffold_517:615348-630930	scaffold_517:624098-624298	201	31.2	1	mms19_NM_001078912_-_scaffold_517:587852-631054@INTRON_30,
scaffold_9:2310906-3030103	scaffold_9:2989006-2989156	151	31.1	1	cadm2_NM_001005713_+_scaffold_9:2310496-3241766@INTRON_1,
scaffold_43:2732754-3005984	scaffold_43:2985554-2985704	151	31.1	1	mitf_NM_001100277_-_scaffold_43:2684980-3006141@INTRON_3,
scaffold_60:3432908-3437124	scaffold_60:3436608-3436708	101	31.1	1	prmt10_NM_001142186_+_scaffold_60:3415240-3437227@INTRON_5,
scaffold_68:2684851-2714697	scaffold_68:2700701-2700901	201	31.1	1	rtn1_NM_001085350_-_scaffold_68:2677137-2762253@INTRON_6,
scaffold_103:988176-992067	scaffold_103:991576-991676	101	31.1	1	tln2_NM_001123412_+_scaffold_103:932208-1059192@INTRON_3,
scaffold_331:175308-493206	scaffold_331:284458-284558	101	31.1	1	opcml_NM_001079019_-_scaffold_331:51689-493354@INTRON_2,
scaffold_722:16978-42920	scaffold_722:21628-21778	151	31.1	1	fhl2_NM_001126761_+_scaffold_722:16640-59382@INTRON_1,
scaffold_1802:10146-13041	scaffold_1802:11946-12046	101	31.1	1	pla2g7_NM_001017267_+_scaffold_1802:834-13833@INTRON_8,
scaffold_29:2270893-2276794	scaffold_29:2275293-2275393	101	31	1	psme3_NM_001102730_+_scaffold_29:2270780-2295472@INTRON_1,
scaffold_46:2907904-3168175	scaffold_46:2938354-2938454	101	31	1	arsd_NM_001015952_+_scaffold_46:2907883-3233990@INTRON_1,
scaffold_186:885898-1268142	scaffold_186:950898-950998	101	31	1	LOC549932_NM_001017178_-_scaffold_186:804103-1268179@INTRON_3,
scaffold_194:1455937-1473341	scaffold_194:1471737-1471837	101	31	1	mybph_NM_001045793_-_scaffold_194:1453097-1532058@INTRON_2,
scaffold_291:436482-444932	scaffold_291:441282-441382	101	31	1	dnajb11_NM_203849_-_scaffold_291:409790-496794@INTRON_3,
scaffold_417:667654-669383	scaffold_417:668104-668204	101	31	1	scamp5_NM_001007954_-_scaffold_417:666555-677143@INTRON_1,
scaffold_576:598979-647892	scaffold_576:645129-645279	151	31	1	uhrf1bp1l_NM_001130247_-_scaffold_576:598486-704443@INTRON_1,
scaffold_576:91153-94345	scaffold_576:92153-92253	101	31	1	polr3b_NM_001128049_-_scaffold_576:36983-104720@INTRON_22,
scaffold_1121:14505-15776	scaffold_1121:15105-15205	101	31	1	rbpms_NM_001171852_+_scaffold_1121:14425-89174@INTRON_1,
scaffold_2:663673-669928	scaffold_2:666023-666123	101	30.9	1	calcrl_NM_001016893_-_scaffold_2:661304-786245@INTRON_3,
scaffold_11:4994674-5097744	scaffold_11:5088974-5089124	151	30.9	1	celf2_NM_001102947_+_scaffold_11:4994435-5231750@INTRON_1,
scaffold_331:175308-493206	scaffold_331:232108-232208	101	30.9	1	opcml_NM_001079019_-_scaffold_331:51689-493354@INTRON_2,
scaffold_576:598979-647892	scaffold_576:633129-633279	151	30.9	1	uhrf1bp1l_NM_001130247_-_scaffold_576:598486-704443@INTRON_1,
scaffold_79:1772801-2156564	scaffold_79:1940851-1940951	101	30.8	1	slc39a3_NM_001102697_+_scaffold_79:680766-2284175@INTRON_13,
scaffold_95:2184035-2245205	scaffold_95:2232835-2233035	201	30.8	1	gmds_NM_001037253_+_scaffold_95:2116652-2469750@INTRON_5,
scaffold_191:692648-913984	scaffold_191:901248-901348	101	30.8	1	tulp3_NM_001123481_-_scaffold_191:255556-1465506@INTRON_3,
scaffold_259:1423111-1442968	scaffold_259:1437661-1437761	101	30.8	1	epyc_NM_001005627_-_scaffold_259:1398996-1443140@INTRON_5,
scaffold_106:1587520-1602002	scaffold_106:1598070-1598170	101	30.7	1	ccdc21_NM_001126536_+_scaffold_106:1570291-1602473@INTRON_8,
scaffold_158:215104-218914	scaffold_158:217454-217604	151	30.7	1	cyp1a1_NM_001126813_-_scaffold_158:214445-227716@INTRON_1,
scaffold_26:2471076-3027687	scaffold_26:3005676-3005776	101	30.6	1	c1qtnf4_NM_001011345_-_scaffold_26:2470905-3738113@INTRON_1,
scaffold_252:793983-798102	scaffold_252:796533-796633	101	30.6	1	soat1_NM_001126764_-_scaffold_252:787563-813675@INTRON_7,
scaffold_254:841149-845931	scaffold_254:841899-842049	151	30.6	1	bmper_NM_001044402_+_scaffold_254:771795-887260@INTRON_10,
scaffold_397:633938-711023	scaffold_397:656038-656138	101	30.6	1	tspan9_NM_001126530_-_scaffold_397:534858-767509@INTRON_7,
scaffold_558:307913-316109	scaffold_558:312863-313013	151	30.6	1	otud4_NM_001079130_+_scaffold_558:295157-331407@INTRON_9,
scaffold_65:1831410-1935213	scaffold_65:1923660-1923910	251	30.5	1	c16orf45_NM_001142078_-_scaffold_65:1491901-1935285@INTRON_4,
scaffold_106:84779-503722	scaffold_106:150029-150129	101	30.5	1	slc39a3_NM_001102697_-_scaffold_106:83848-2455684@INTRON_4,
scaffold_129:1091831-1149497	scaffold_129:1148881-1149031	151	30.5	1	LOC779492_NM_001134807_-_scaffold_129:1091726-1149729@INTRON_1,
scaffold_190:1658215-1943970	scaffold_190:1661815-1661915	101	30.5	1	c3p1_NR_033392_-_scaffold_190:1643590-1945983@INTRON_5,
scaffold_7:4365979-4415251	scaffold_7:4397829-4397979	151	30.4	1	tnfaip8_NM_001017184_-_scaffold_7:4364575-4415406@INTRON_1,
scaffold_23:2872158-2874466	scaffold_23:2873658-2873758	101	30.4	1	derl2_NM_001016097_-_scaffold_23:2871714-2880732@INTRON_1,
scaffold_99:470699-746188	scaffold_99:514999-515099	101	30.4	1	LOC100158618_NM_001128034_-_scaffold_99:470628-1073815@INTRON_1,
scaffold_113:862408-870407	scaffold_113:867058-867158	101	30.4	1	fcho2_NM_001142071_+_scaffold_113:832210-902166@INTRON_5,
scaffold_429:693151-732102	scaffold_429:705101-705251	151	30.4	1	c6orf106_NM_001126074_+_scaffold_429:692611-745917@INTRON_1,
scaffold_434:149292-179809	scaffold_434:152542-152642	101	30.4	1	nhsl1_NM_001142125_-_scaffold_434:147209-324347@INTRON_1,
scaffold_513:590557-621841	scaffold_513:617257-617357	101	30.4	1	mdm4_NM_001142245_+_scaffold_513:589314-740151@INTRON_2,
scaffold_111:2642289-2690203	scaffold_111:2674489-2674589	101	30.3	1	tspan5_NM_001078730_-_scaffold_111:2622789-2690376@INTRON_7,
scaffold_207:101190-103917	scaffold_207:101790-101890	101	30.3	1	slc2a5_NM_001008186_+_scaffold_207:95701-110525@INTRON_3,
scaffold_344:663853-712872	scaffold_344:685953-686053	101	30.3	1	LOC100158523_NM_001127960_+_scaffold_344:663538-753973@INTRON_1,
scaffold_379:754453-761319	scaffold_379:759403-759503	101	30.3	1	kdm2a_NM_001011176_-_scaffold_379:748893-783628@INTRON_3,
scaffold_491:286098-330911	scaffold_491:297598-297698	101	30.3	1	kcnh5_NM_001127437_+_scaffold_491:213159-358278@INTRON_7,
scaffold_493:774170-793269	scaffold_493:785970-786070	101	30.3	1	znf830_NM_001004918_-_scaffold_493:746296-797884@INTRON_6,
scaffold_535:324394-605403	scaffold_535:556944-557044	101	30.3	1	zadh2_NM_001011370_+_scaffold_535:60153-605646@INTRON_2,
scaffold_674:141324-145775	scaffold_674:144024-144124	101	30.3	1	trip13_NM_203897_-_scaffold_674:133140-165885@INTRON_3,
scaffold_29:2311292-2323796	scaffold_29:2321142-2321242	101	30.2	1	aoc3_NM_001030413_+_scaffold_29:2305466-2324142@INTRON_3,
scaffold_415:745067-864516	scaffold_415:825317-825467	151	30.2	1	syt4_NM_001171514_-_scaffold_415:512204-867856@INTRON_2,
scaffold_434:193377-219397	scaffold_434:213577-213727	151	30.2	1	nhsl1_NM_001142125_-_scaffold_434:147209-324347@INTRON_4,
scaffold_19:1020285-1023129	scaffold_19:1022135-1022235	101	30.1	1	ccnc_NM_203826_+_scaffold_19:1010068-1024786@INTRON_10,
scaffold_41:190029-200298	scaffold_41:194379-194479	101	30.1	1	tulp1_NM_001016482_-_scaffold_41:125078-229182@INTRON_10,
scaffold_45:2544039-2599922	scaffold_45:2579239-2579389	151	30.1	1	srpk3_NM_001102962_-_scaffold_45:2491207-2600208@INTRON_13,
scaffold_139:1962910-1965675	scaffold_139:1963510-1963610	101	30.1	1	prelid2_NM_001016922_-_scaffold_139:1937659-1981482@INTRON_4,
scaffold_535:324394-605403	scaffold_535:567594-567694	101	30.1	1	zadh2_NM_001011370_+_scaffold_535:60153-605646@INTRON_2,
scaffold_138:278149-285557	scaffold_138:283449-283599	151	29.9	1	ccdc3_NM_001017103_-_scaffold_138:260189-286170@INTRON_2,
scaffold_154:958812-972051	scaffold_154:965662-965812	151	29.8	1	atp2b3_NM_001131043_+_scaffold_154:878268-1011465@INTRON_6,
scaffold_70:155902-157378	scaffold_70:156652-156802	151	29.7	1	hccs_NM_001005708_-_scaffold_70:152361-158219@INTRON_5,
scaffold_95:1284466-1297932	scaffold_95:1291916-1292066	151	29.7	1	tnfrsf11a_NM_001100262_+_scaffold_95:1262989-1319515@INTRON_2,
scaffold_208:1543803-1553385	scaffold_208:1546003-1546153	151	29.7	1	cdk15_NM_001079451_+_scaffold_208:1543775-1640899@INTRON_1,
scaffold_425:790058-795606	scaffold_425:793758-793908	151	29.7	1	tgfbr1_NM_001015961_+_scaffold_425:754250-806388@INTRON_5,
scaffold_60:1319847-1321264	scaffold_60:1320297-1320447	151	29.6	1	mnd1_NM_001015849_-_scaffold_60:1300192-1323355@INTRON_6,
scaffold_486:672807-701335	scaffold_486:688307-688457	151	29.6	1	ralgapa2_NM_001126826_+_scaffold_486:672405-846155@INTRON_1,
scaffold_320:125843-141808	scaffold_320:133743-133893	151	29.5	1	cnot10_NM_001016273_+_scaffold_320:90780-157478@INTRON_9,
scaffold_482:654718-666800	scaffold_482:660018-660268	251	29.5	1	smap1_NM_001126910_+_scaffold_482:638486-733129@INTRON_2,
scaffold_84:2080108-2115611	scaffold_84:2091008-2091158	151	29.4	1	greb1l_NM_001130279_+_scaffold_84:2079841-2154461@INTRON_1,
scaffold_201:416935-424457	scaffold_201:422535-422685	151	29.3	1	ribc2_NM_001127422_-_scaffold_201:416788-429390@INTRON_1,
scaffold_379:754453-761319	scaffold_379:759103-759253	151	29	1	kdm2a_NM_001011176_-_scaffold_379:748893-783628@INTRON_3,
scaffold_328:128130-146937	scaffold_328:142630-142780	151	28.7	1	gpr116_NM_001113826_+_scaffold_328:121970-168787@INTRON_2,
scaffold_118:804765-933145	scaffold_118:817815-817965	151	28.6	1	fam189a1_NM_001078904_+_scaffold_118:804096-1122860@INTRON_1,
scaffold_89:1050220-1052407	scaffold_89:1052120-1052270	151	28.5	1	LOC100327248_NM_001171530_-_scaffold_89:1043838-1052475@INTRON_5,
scaffold_188:895032-900475	scaffold_188:899282-899432	151	28.4	1	banp_NM_203864_-_scaffold_188:703445-903409@INTRON_10,
scaffold_49:2111848-2125819	scaffold_49:2121948-2122098	151	28.3	1	tdp1_NM_001045777_+_scaffold_49:2080504-2136466@INTRON_14,
scaffold_315:95995-122169	scaffold_315:107645-107795	151	28	1	LOC496764_NM_001011309_-_scaffold_315:93089-133380@INTRON_5,
scaffold_204:479218-496839	scaffold_204:481818-481968	151	27.9	1	lrrc20_NM_001011063_-_scaffold_204:356897-496864@INTRON_4,
scaffold_379:282195-327838	scaffold_379:314895-315045	151	27.9	1	unc93b1_NM_001100253_-_scaffold_379:255521-338606@INTRON_10,
scaffold_591:7874-11011	scaffold_591:9474-9624	151	27.8	1	ercc1_NM_001113921_-_scaffold_591:6899-41184@INTRON_2,
scaffold_155:1999525-2001545	scaffold_155:2000675-2000825	151	27.6	1	mapt_NM_001078997_-_scaffold_155:1993443-2041045@INTRON_3,
scaffold_162:264279-266803	scaffold_162:266579-266729	151	27.6	1	rps6_NM_203821_+_scaffold_162:260990-268062@INTRON_3,
scaffold_474:371345-601733	scaffold_474:551145-551295	151	27.5	1	commd2_NM_001113076_-_scaffold_474:188066-601774@INTRON_3,
scaffold_119:2554760-2558523	scaffold_119:2555410-2555560	151	27.3	1	ddx10_NM_001102681_+_scaffold_119:2541739-2595489@INTRON_6,
scaffold_700:172831-259434	scaffold_700:230081-230231	151	26.8	1	arl15_NM_001007880_+_scaffold_700:65655-261379@INTRON_4,
scaffold_742:364243-371186	scaffold_742:366043-366193	151	26.8	1	tmbim4_NM_001004879_+_scaffold_742:364111-375553@INTRON_1,
scaffold_429:693151-732102	scaffold_429:704651-704801	151	26.7	1	c6orf106_NM_001126074_+_scaffold_429:692611-745917@INTRON_1,
scaffold_637:3963-23704	scaffold_637:11363-11513	151	26.6	1	cyp7b1_NM_001127039_-_scaffold_637:2691-99015@INTRON_2,
scaffold_95:360285-364815	scaffold_95:363685-363835	151	26.5	1	LOC100145511_NM_001126954_+_scaffold_95:350378-368730@INTRON_12,
scaffold_79:1772801-2156564	scaffold_79:2031351-2031501	151	26.4	1	slc39a3_NM_001102697_+_scaffold_79:680766-2284175@INTRON_13,
scaffold_289:521955-527813	scaffold_289:526055-526205	151	26.4	1	stk11_NM_001016533_-_scaffold_289:498004-528230@INTRON_9,
scaffold_313:164679-293220	scaffold_313:240229-240379	151	26.4	1	lcp2_NM_001128017_-_scaffold_313:164515-603941@INTRON_1,
scaffold_301:598065-609380	scaffold_301:606915-607065	151	26.3	1	ptprs_NM_001141992_+_scaffold_301:463997-609567@INTRON_10,
scaffold_106:84779-503722	scaffold_106:218679-218829	151	26	1	slc39a3_NM_001102697_-_scaffold_106:83848-2455684@INTRON_4,
scaffold_554:4160-21822	scaffold_554:8610-8760	151	26	1	pcsk5_NM_001079038_-_scaffold_554:4070-92883@INTRON_1,
scaffold_5:4170507-4197822	scaffold_5:4173557-4173707	151	25.8	1	c9orf30_NM_001016739_+_scaffold_5:4170366-4254549@INTRON_1,
scaffold_67:580546-588871	scaffold_67:585296-585446	151	25.6	1	b4galnt1_NM_001126696_-_scaffold_67:561404-643222@INTRON_11,
scaffold_59:3045562-3047920	scaffold_59:3046312-3046462	151	25.5	1	wdr19_NM_001123477_-_scaffold_59:3026085-3076705@INTRON_19,
scaffold_158:215104-218914	scaffold_158:217204-217354	151	25.3	1	cyp1a1_NM_001126813_-_scaffold_158:214445-227716@INTRON_1,
scaffold_745:307168-440183	scaffold_745:355818-355968	151	25.3	1	slc47a2_NM_001102970_-_scaffold_745:306883-440449@INTRON_1,
scaffold_27:3218755-3491978	scaffold_27:3397605-3397755	151	25	1	gdpd5_NM_001127121_+_scaffold_27:1776726-3883646@INTRON_9,
scaffold_140:728778-798138	scaffold_140:731778-731928	151	25	1	ctnnal1_NM_001102965_+_scaffold_140:728415-927801@INTRON_1,
scaffold_213:1136331-1138090	scaffold_213:1136781-1136931	151	24.8	1	fam65b_NM_001130276_-_scaffold_213:1132412-1198555@INTRON_2,
scaffold_34:2891058-3302201	scaffold_34:3267108-3267258	151	24.4	1	sirt4_NM_001045628_-_scaffold_34:2890969-3918895@INTRON_1,
scaffold_301:598065-609380	scaffold_301:606165-606315	151	24.4	1	ptprs_NM_001141992_+_scaffold_301:463997-609567@INTRON_10,
scaffold_716:451835-488014	scaffold_716:478885-479035	151	24.1	1	chmp5_NM_001015720_-_scaffold_716:423203-501699@INTRON_3,
scaffold_716:451835-488014	scaffold_716:478885-479035	151	24.1	1	chmp5_NM_001016748_-_scaffold_716:423199-501699@INTRON_3,
scaffold_106:1680115-2016415	scaffold_106:2011465-2011615	151	24	1	slc39a3_NM_001102697_-_scaffold_106:83848-2455684@INTRON_10,
scaffold_179:484051-490474	scaffold_179:487201-487351	151	24	1	ascc1_NM_001102901_-_scaffold_179:426723-547510@INTRON_3,
scaffold_902:79991-105941	scaffold_902:85391-85541	151	23.8	1	mapk10_NM_001114219_+_scaffold_902:79962-243221@INTRON_1,
scaffold_396:890687-892784	scaffold_396:892237-892387	151	23.7	1	syngap1_NM_001134816_+_scaffold_396:883568-940928@INTRON_4,
scaffold_4:3950738-3972723	scaffold_4:3952538-3952688	151	23.5	1	fggy_NM_001126804_+_scaffold_4:3928643-4053351@INTRON_5,
scaffold_238:1069922-1118626	scaffold_238:1098472-1098622	151	23.5	1	btrc_NM_001016386_-_scaffold_238:1014158-1121027@INTRON_12,
scaffold_254:420908-441326	scaffold_254:424308-424458	151	23.5	1	bbs9_NM_001016821_+_scaffold_254:405994-575912@INTRON_5,
scaffold_430:799878-863554	scaffold_430:818628-818778	151	23.2	1	hdhd1_NM_001011342_+_scaffold_430:749174-864615@INTRON_3,
scaffold_6:5421175-5424936	scaffold_6:5423825-5423975	151	23	1	n4bp1_NM_001004870_+_scaffold_6:5420859-5442162@INTRON_1,
scaffold_6:5275425-5562513	scaffold_6:5423825-5423975	151	23	1	slc39a3_NM_001102697_-_scaffold_6:2781856-5867994@INTRON_12,
scaffold_103:386828-430435	scaffold_103:389578-389728	151	23	1	neo1_NM_001129940_-_scaffold_103:345670-430676@INTRON_28,
scaffold_2:496380-509798	scaffold_2:497930-498080	151	22.7	1	itgav_NM_001123449_+_scaffold_2:457190-644980@INTRON_4,
scaffold_89:2366026-2389844	scaffold_89:2383776-2383926	151	22.4	1	ndst3_NM_001127047_+_scaffold_89:2365635-2489381@INTRON_1,
scaffold_4:4025128-4028968	scaffold_4:4027078-4027228	151	22.3	1	fggy_NM_001126804_+_scaffold_4:3928643-4053351@INTRON_13,
scaffold_49:2743920-2751308	scaffold_49:2748820-2748970	151	21.7	1	fbln5_NM_001030448_-_scaffold_49:2733583-2765850@INTRON_6,
scaffold_52:2640695-2655915	scaffold_52:2650745-2650895	151	21.2	1	ispd_NM_001016240_+_scaffold_52:2613821-2686967@INTRON_3,
scaffold_217:1288490-1333082	scaffold_217:1306740-1306890	151	21.1	1	dym_NM_001045778_+_scaffold_217:1209066-1378645@INTRON_12,
scaffold_573:291154-577850	scaffold_573:341504-341654	151	20.8	1	myo15a_NM_001100245_-_scaffold_573:284514-577897@INTRON_3,
scaffold_296:1490940-1491967	scaffold_296:1491740-1491890	151	20.6	1	ehd1_NM_001006733_+_scaffold_296:1468222-1492510@INTRON_4,
scaffold_238:1069922-1118626	scaffold_238:1098022-1098272	251	63.1	2	btrc_NM_001016386_-_scaffold_238:1014158-1121027@INTRON_12,
scaffold_744:418893-421504	scaffold_744:419593-419743	151	57.3	2	rnf5_NM_001017071_+_scaffold_744:417144-428379@INTRON_2,
scaffold_71:743158-795200	scaffold_71:794808-795008	201	55.3	2	LOC779492_NM_001134807_-_scaffold_71:349196-795262@INTRON_2,
scaffold_71:743158-795200	scaffold_71:785858-786058	201	55.2	2	LOC779492_NM_001134807_-_scaffold_71:349196-795262@INTRON_2,
scaffold_493:584132-864048	scaffold_493:599532-599782	251	52.9	2	LOC100037835_NM_001114850_-_scaffold_493:557105-866867@INTRON_2,
scaffold_362:146071-412734	scaffold_362:289521-289721	201	47.9	2	btn2a1_NM_001130216_+_scaffold_362:142052-412801@INTRON_4,
scaffold_7:41779-709718	scaffold_7:44279-44429	151	46.1	2	myo15a_NM_001100245_+_scaffold_7:41322-933681@INTRON_1,
scaffold_744:422261-423910	scaffold_744:422511-422711	201	44	2	rnf5_NM_001017071_+_scaffold_744:417144-428379@INTRON_4,
scaffold_55:559359-564512	scaffold_55:562809-562959	151	43.1	2	dner_NM_001122791_+_scaffold_55:509389-592771@INTRON_3,
scaffold_817:13277-26290	scaffold_817:24027-24177	151	42.3	2	cltc_NM_001011039_-_scaffold_817:13069-26535@INTRON_1,
scaffold_259:1412962-1422945	scaffold_259:1421162-1421312	151	40.8	2	epyc_NM_001005627_-_scaffold_259:1398996-1443140@INTRON_4,
scaffold_291:436482-444932	scaffold_291:442032-442182	151	39.3	2	dnajb11_NM_203849_-_scaffold_291:409790-496794@INTRON_3,
scaffold_123:2520000-2572916	scaffold_123:2536950-2537050	101	39	2	gatad1_NM_001170506_+_scaffold_123:2243843-2573111@INTRON_2,
scaffold_291:447209-465196	scaffold_291:453609-453759	151	38.9	2	dnajb11_NM_203849_-_scaffold_291:409790-496794@INTRON_5,
scaffold_41:933702-937195	scaffold_41:934452-934552	101	38.2	2	prelp_NM_001102738_-_scaffold_41:930725-957276@INTRON_1,
scaffold_71:743158-795200	scaffold_71:753408-753558	151	38.2	2	LOC779492_NM_001134807_-_scaffold_71:349196-795262@INTRON_2,
scaffold_716:451835-488014	scaffold_716:466585-466785	201	37.8	2	chmp5_NM_001015720_-_scaffold_716:423203-501699@INTRON_3,
scaffold_716:451835-488014	scaffold_716:466585-466785	201	37.8	2	chmp5_NM_001016748_-_scaffold_716:423199-501699@INTRON_3,
scaffold_196:290332-394732	scaffold_196:330832-331032	201	37	2	grm7_NM_001113008_+_scaffold_196:289716-556761@INTRON_1,
scaffold_535:324394-605403	scaffold_535:373144-373244	101	36.3	2	zadh2_NM_001011370_+_scaffold_535:60153-605646@INTRON_2,
scaffold_29:2270893-2276794	scaffold_29:2272843-2273043	201	35.9	2	psme3_NM_001102730_+_scaffold_29:2270780-2295472@INTRON_1,
scaffold_409:599075-842329	scaffold_409:608325-608425	101	35.6	2	LOC100492947_NM_001195230_+_scaffold_409:598989-842684@INTRON_2,
scaffold_744:418893-421504	scaffold_744:420143-420243	101	35.5	2	rnf5_NM_001017071_+_scaffold_744:417144-428379@INTRON_2,
scaffold_7:40671-49875	scaffold_7:44271-44471	201	35.4	2	kremen1_NM_001123455_+_scaffold_7:23411-80141@INTRON_2,
scaffold_55:794510-811283	scaffold_55:808560-808660	101	35.4	2	slc19a3_NM_001006754_+_scaffold_55:785830-812759@INTRON_3,
scaffold_254:420908-441326	scaffold_254:427358-427458	101	34.9	2	bbs9_NM_001016821_+_scaffold_254:405994-575912@INTRON_5,
scaffold_140:1174760-1196345	scaffold_140:1180410-1180660	251	34.4	2	tmeff1_NM_001100268_+_scaffold_140:1093531-1225056@INTRON_5,
scaffold_170:817297-899043	scaffold_170:862447-862547	101	34.3	2	chst8_NM_001079061_-_scaffold_170:806600-1049192@INTRON_2,
scaffold_16:1958218-2300589	scaffold_16:2092718-2092868	151	33.8	2	ypel2_NM_001102689_+_scaffold_16:1547739-2300995@INTRON_4,
scaffold_535:269178-769927	scaffold_535:373128-373228	101	33.8	2	hist2h2ab_NM_001030325_-_scaffold_535:268679-770176@INTRON_1,
scaffold_174:1556648-1584863	scaffold_174:1567598-1567748	151	33.7	2	noxo1_NM_001112986_+_scaffold_174:1463579-1999224@INTRON_4,
scaffold_677:227468-431501	scaffold_677:393018-393118	101	33.5	2	zfp2_NM_001078916_-_scaffold_677:188669-431977@INTRON_3,
scaffold_434:637627-675356	scaffold_434:651527-651627	101	33.4	2	reps1_NM_001045730_-_scaffold_434:505856-760350@INTRON_11,
scaffold_29:2270893-2276794	scaffold_29:2274043-2274193	151	33.3	2	psme3_NM_001102730_+_scaffold_29:2270780-2295472@INTRON_1,
scaffold_508:633164-639630	scaffold_508:636014-636114	101	33.2	2	adam19_NM_001040016_-_scaffold_508:608207-643432@INTRON_19,
scaffold_11:1298855-1301242	scaffold_11:1300255-1300355	101	32.9	2	tsga14_NM_001016937_-_scaffold_11:1289635-1316983@INTRON_6,
scaffold_950:174249-181062	scaffold_950:180499-180649	151	32.7	2	ctr9_NM_001005076_-_scaffold_950:165206-181510@INTRON_19,
scaffold_26:2471076-3027687	scaffold_26:2782076-2782176	101	32.2	2	c1qtnf4_NM_001011345_-_scaffold_26:2470905-3738113@INTRON_1,
scaffold_9:2310906-3030103	scaffold_9:2935106-2935206	101	31.7	2	cadm2_NM_001005713_+_scaffold_9:2310496-3241766@INTRON_1,
scaffold_70:3225784-3239211	scaffold_70:3230034-3230134	101	31.7	2	cdc7_NM_001016581_-_scaffold_70:3222997-3254852@INTRON_2,
scaffold_106:1587520-1602002	scaffold_106:1599470-1599570	101	31.6	2	ccdc21_NM_001126536_+_scaffold_106:1570291-1602473@INTRON_8,
scaffold_103:386828-430435	scaffold_103:389328-389428	101	31.5	2	neo1_NM_001129940_-_scaffold_103:345670-430676@INTRON_28,
scaffold_573:291154-577850	scaffold_573:474654-474754	101	31.4	2	myo15a_NM_001100245_-_scaffold_573:284514-577897@INTRON_3,
scaffold_5:4404500-4488457	scaffold_5:4465200-4465300	101	31.3	2	ifit5_NM_001142188_-_scaffold_5:4404167-4654764@INTRON_1,
scaffold_220:659-11128	scaffold_220:2559-2659	101	31.3	2	h6pd_NM_001113034_+_scaffold_220:538-15066@INTRON_1,
scaffold_535:324394-605403	scaffold_535:549844-549944	101	31.2	2	zadh2_NM_001011370_+_scaffold_535:60153-605646@INTRON_2,
scaffold_69:2325082-2329374	scaffold_69:2327132-2327282	151	31.1	2	aldh9a1_NM_001006904_+_scaffold_69:2323488-2342041@INTRON_2,
scaffold_41:148571-157587	scaffold_41:149821-149971	151	31	2	tulp1_NM_001016482_-_scaffold_41:125078-229182@INTRON_8,
scaffold_88:820476-832358	scaffold_88:827326-827426	101	30.9	2	LOC100127659_NM_001113003_-_scaffold_88:819104-840840@INTRON_1,
scaffold_179:273263-281975	scaffold_179:278863-278963	101	30.8	2	spock2_NM_001126515_-_scaffold_179:269846-359483@INTRON_4,
scaffold_483:474593-811871	scaffold_483:706943-707043	101	30.8	2	c16orf57_NM_001127143_+_scaffold_483:474387-811964@INTRON_1,
scaffold_493:584132-864048	scaffold_493:599832-599982	151	30.8	2	LOC100037835_NM_001114850_-_scaffold_493:557105-866867@INTRON_2,
scaffold_923:192677-207723	scaffold_923:197477-197577	101	30.6	2	ywhae_NM_001008155_-_scaffold_923:185716-207957@INTRON_5,
scaffold_179:273263-281975	scaffold_179:274563-274663	101	30.5	2	spock2_NM_001126515_-_scaffold_179:269846-359483@INTRON_4,
scaffold_508:633164-639630	scaffold_508:638014-638114	101	30.5	2	adam19_NM_001040016_-_scaffold_508:608207-643432@INTRON_19,
scaffold_106:355212-359452	scaffold_106:358162-358262	101	30.4	2	pold1_NM_001045739_-_scaffold_106:300339-359540@INTRON_25,
scaffold_188:712226-787198	scaffold_188:751576-751676	101	30.4	2	banp_NM_203864_-_scaffold_188:703445-903409@INTRON_2,
scaffold_258:661408-664119	scaffold_258:662808-662908	101	30.4	2	nsdhl_NM_001017290_-_scaffold_258:657737-669984@INTRON_3,
scaffold_745:307168-440183	scaffold_745:337218-337318	101	30.3	2	slc47a2_NM_001102970_-_scaffold_745:306883-440449@INTRON_1,
scaffold_34:2891058-3302201	scaffold_34:2943658-2943758	101	30.2	2	sirt4_NM_001045628_-_scaffold_34:2890969-3918895@INTRON_1,
scaffold_135:1417669-1808993	scaffold_135:1687569-1687669	101	30.2	2	chd9_NM_001045586_+_scaffold_135:1214575-1809035@INTRON_2,
scaffold_135:1677819-1689863	scaffold_135:1687569-1687669	101	30.2	2	hip1r_NM_001123435_+_scaffold_135:1677650-1716444@INTRON_1,
scaffold_664:482779-487634	scaffold_664:486079-486179	101	30.1	2	acadl_NM_001045785_+_scaffold_664:482549-501898@INTRON_1,
scaffold_491:286098-330911	scaffold_491:298348-298498	151	30	2	kcnh5_NM_001127437_+_scaffold_491:213159-358278@INTRON_7,
scaffold_330:492043-495047	scaffold_330:492793-492943	151	27.3	2	mrpl13_NM_001016796_+_scaffold_330:479739-507594@INTRON_3,
scaffold_21:3176577-3297485	scaffold_21:3245477-3245627	151	25.8	2	ptk2b_NM_001011049_-_scaffold_21:3176394-3297582@INTRON_1,
scaffold_213:1482043-1489167	scaffold_213:1483043-1483193	151	25.2	2	lrrc16a_NM_001127140_+_scaffold_213:1393364-1497627@INTRON_16,
scaffold_179:289646-359253	scaffold_179:333796-333946	151	24.5	2	spock2_NM_001126515_-_scaffold_179:269846-359483@INTRON_9,
scaffold_291:436482-444932	scaffold_291:441882-442032	151	23.3	2	dnajb11_NM_203849_-_scaffold_291:409790-496794@INTRON_3,
scaffold_291:447209-465196	scaffold_291:453459-453609	151	23.3	2	dnajb11_NM_203849_-_scaffold_291:409790-496794@INTRON_5,
scaffold_387:527088-553737	scaffold_387:548638-548788	151	22.7	2	ifngr1_NM_001079346_+_scaffold_387:526819-603105@INTRON_1,
scaffold_79:1772801-2156564	scaffold_79:1836651-1836751	101	44.3	3	slc39a3_NM_001102697_+_scaffold_79:680766-2284175@INTRON_13,
scaffold_386:645305-1101085	scaffold_386:1038155-1038305	151	43.3	3	ifit5_NM_001142188_-_scaffold_386:175917-1101219@INTRON_6,
scaffold_16:1547869-1803167	scaffold_16:1784719-1784819	101	42.1	3	ypel2_NM_001102689_+_scaffold_16:1547739-2300995@INTRON_1,
scaffold_58:1279953-1694133	scaffold_58:1582653-1582803	151	37.6	3	c16orf57_NM_001127143_-_scaffold_58:1279860-1694372@INTRON_1,
scaffold_36:307489-311465	scaffold_36:308389-308489	101	37.5	3	LOC100145209_NM_001126697_+_scaffold_36:295717-331699@INTRON_9,
scaffold_291:447209-465196	scaffold_291:453909-454059	151	36.4	3	dnajb11_NM_203849_-_scaffold_291:409790-496794@INTRON_5,
scaffold_34:3556578-3918839	scaffold_34:3606678-3606778	101	36	3	sirt4_NM_001045628_-_scaffold_34:2890969-3918895@INTRON_6,
scaffold_49:2523275-2532530	scaffold_49:2528825-2528975	151	35.9	3	c14orf159_NM_001016461_+_scaffold_49:2523218-2549833@INTRON_1,
scaffold_386:645305-1101085	scaffold_386:1049955-1050155	201	35.9	3	ifit5_NM_001142188_-_scaffold_386:175917-1101219@INTRON_6,
scaffold_52:1205932-1220549	scaffold_52:1207332-1207432	101	35.6	3	tmem196_NM_001102979_+_scaffold_52:1188442-1221118@INTRON_3,
scaffold_188:712226-787198	scaffold_188:752776-752876	101	35.2	3	banp_NM_203864_-_scaffold_188:703445-903409@INTRON_2,
scaffold_115:857131-874804	scaffold_115:869931-870081	151	35.1	3	klhl32_NM_001016857_-_scaffold_115:771294-916007@INTRON_8,
scaffold_50:1824118-1851066	scaffold_50:1826768-1826868	101	34.3	3	rsrc1_NM_001016318_-_scaffold_50:1763532-1899894@INTRON_5,
scaffold_331:175308-493206	scaffold_331:321158-321258	101	33.8	3	opcml_NM_001079019_-_scaffold_331:51689-493354@INTRON_2,
scaffold_132:303615-319102	scaffold_132:312015-312115	101	33.1	3	dvl3_NM_001123457_+_scaffold_132:265772-333634@INTRON_4,
scaffold_883:148317-238526	scaffold_883:226167-226267	101	32.3	3	MGC69309_NM_001004837_-_scaffold_883:1552-247279@INTRON_3,
scaffold_1011:32398-58245	scaffold_1011:51798-51898	101	32	3	lrrc4b_NM_001102888_+_scaffold_1011:32247-66603@INTRON_1,
scaffold_346:345819-350418	scaffold_346:347319-347419	101	31.7	3	cdk10_NM_001016575_-_scaffold_346:345200-361702@INTRON_1,
scaffold_15:975979-995664	scaffold_15:990779-990879	101	31.3	3	ypel2_NM_001102689_+_scaffold_15:538211-995952@INTRON_8,
scaffold_34:920777-927629	scaffold_34:924177-924277	101	30.8	3	epb49_NM_001015862_+_scaffold_34:913149-931499@INTRON_8,
scaffold_83:1985861-1987573	scaffold_83:1986211-1986311	101	30.3	3	lypla1_NM_001005699_-_scaffold_83:1975810-1996033@INTRON_6,
scaffold_213:1664246-1708295	scaffold_213:1698896-1699046	151	29.5	3	pard6g_NM_001017338_+_scaffold_213:1643597-1711180@INTRON_2,
scaffold_115:857131-874804	scaffold_115:869781-869931	151	36.5	4	klhl32_NM_001016857_-_scaffold_115:771294-916007@INTRON_8,
scaffold_41:3269845-3283209	scaffold_41:3280345-3280495	151	35.2	4	dcaf6_NM_001079565_-_scaffold_41:3229866-3313374@INTRON_11,
scaffold_115:857131-874804	scaffold_115:869631-869781	151	33.9	4	klhl32_NM_001016857_-_scaffold_115:771294-916007@INTRON_8,
scaffold_117:1557511-1626638	scaffold_117:1594811-1594961	151	33.9	4	fam155b_NM_001102863_-_scaffold_117:1547082-1627493@INTRON_2,
scaffold_535:269178-769927	scaffold_535:549828-549928	101	33	4	hist2h2ab_NM_001030325_-_scaffold_535:268679-770176@INTRON_1,
scaffold_573:291154-577850	scaffold_573:472054-472204	151	32.7	4	myo15a_NM_001100245_-_scaffold_573:284514-577897@INTRON_3,
scaffold_49:1723436-1795801	scaffold_49:1771936-1772036	101	32.1	4	cyp46a1_NM_001126803_+_scaffold_49:1707094-1800771@INTRON_9,
scaffold_496:743434-746435	scaffold_496:745634-745734	101	32.1	4	ndrg1_NM_001008145_-_scaffold_496:742610-773801@INTRON_1,
scaffold_90:1178762-1407123	scaffold_90:1261212-1261312	101	32	4	odz2_NM_001102690_+_scaffold_90:990257-1555574@INTRON_5,
scaffold_90:1234818-1264010	scaffold_90:1261218-1261318	101	32	4	odz3_NM_001016175_+_scaffold_90:990700-1264261@INTRON_6,
scaffold_247:1633157-1639535	scaffold_247:1637357-1637557	201	30.8	4	nid2_NM_001097263_+_scaffold_247:1597501-1643229@INTRON_17,
scaffold_396:1065276-1068978	scaffold_396:1067876-1068026	151	25.4	4	gabbr1_NM_001113819_+_scaffold_396:1023984-1091787@INTRON_8,
scaffold_69:1972748-2785795	scaffold_69:2327148-2327248	101	44.8	5	sh2b3_NM_001100247_+_scaffold_69:1972551-2786447@INTRON_1,
scaffold_106:1680115-2016415	scaffold_106:1887665-1887815	151	41.4	5	slc39a3_NM_001102697_-_scaffold_106:83848-2455684@INTRON_10,
scaffold_6:3927129-4384212	scaffold_6:4145179-4145329	151	38.8	5	slc39a3_NM_001102697_-_scaffold_6:2781856-5867994@INTRON_9,
scaffold_6:4127277-4149603	scaffold_6:4145177-4145327	151	37.8	5	vac14_NM_001142192_+_scaffold_6:4109725-4192899@INTRON_9,
scaffold_35:880734-885378	scaffold_35:883134-883234	101	36.9	5	cask_NM_001016204_+_scaffold_35:738621-911918@INTRON_20,
scaffold_88:1001893-1009057	scaffold_88:1002543-1002643	101	34.8	5	LOC100170434_NM_001130208_-_scaffold_88:994366-1009087@INTRON_3,
scaffold_21:2291600-2326073	scaffold_21:2322400-2322500	101	34.5	5	ttyh3_NM_001126777_+_scaffold_21:2291251-2371919@INTRON_1,
scaffold_89:2473166-2482803	scaffold_89:2479216-2479316	101	34.3	5	ndst3_NM_001127047_+_scaffold_89:2365635-2489381@INTRON_10,
scaffold_697:60310-167750	scaffold_697:85810-85910	101	32.6	5	LOC100145246_NM_001126730_+_scaffold_697:42390-269436@INTRON_9,
scaffold_222:670658-787944	scaffold_222:677658-677758	101	31.7	5	begain_NM_001113026_+_scaffold_222:585058-874492@INTRON_3,
scaffold_513:621975-681271	scaffold_513:674725-674825	101	31.6	5	mdm4_NM_001142245_+_scaffold_513:589314-740151@INTRON_3,
scaffold_346:345819-350418	scaffold_346:347569-347719	151	31.5	5	cdk10_NM_001016575_-_scaffold_346:345200-361702@INTRON_1,
scaffold_228:517760-524087	scaffold_228:522860-522960	101	30.8	5	sec11c_NM_001005129_+_scaffold_228:498518-526156@INTRON_4,
scaffold_29:2060859-2204052	scaffold_29:2198959-2199109	151	21.2	5	becn1_NM_001033940_-_scaffold_29:2034824-2208501@INTRON_10,
scaffold_343:448518-496568	scaffold_343:490018-490118	101	41.2	6	ccni_NM_001005690_+_scaffold_343:432412-503101@INTRON_2,
scaffold_152:1104097-1111514	scaffold_152:1109047-1109197	151	37.6	6	sirt4_NM_001045628_+_scaffold_152:1103851-1507544@INTRON_3,
scaffold_717:181402-185443	scaffold_717:184402-184502	101	36.9	6	pcsk4_NM_001078893_+_scaffold_717:169683-196811@INTRON_3,
scaffold_386:645305-1101085	scaffold_386:1038755-1038955	201	34.1	6	ifit5_NM_001142188_-_scaffold_386:175917-1101219@INTRON_6,
scaffold_5:4489661-4654623	scaffold_5:4518361-4518461	101	32.3	6	ifit5_NM_001142188_-_scaffold_5:4404167-4654764@INTRON_3,
scaffold_99:470699-746188	scaffold_99:515099-515199	101	30.7	6	LOC100158618_NM_001128034_-_scaffold_99:470628-1073815@INTRON_1,
scaffold_493:584132-864048	scaffold_493:785982-786082	101	30.3	6	LOC100037835_NM_001114850_-_scaffold_493:557105-866867@INTRON_2,
scaffold_26:2471076-3027687	scaffold_26:2519526-2519626	101	30.2	6	c1qtnf4_NM_001011345_-_scaffold_26:2470905-3738113@INTRON_1,
scaffold_140:201972-248916	scaffold_140:242122-242222	101	62.4	7	gabbr2_NM_001016007_+_scaffold_140:100515-451999@INTRON_2,
scaffold_343:448518-496568	scaffold_343:490168-490268	101	46.7	7	ccni_NM_001005690_+_scaffold_343:432412-503101@INTRON_2,
scaffold_124:206654-210569	scaffold_124:207454-207604	151	42.3	7	LOC100170615_NM_001130378_+_scaffold_124:200571-220805@INTRON_3,
scaffold_45:2160205-2196600	scaffold_45:2191155-2191355	201	38.2	7	reln_NM_001137612_-_scaffold_45:2010419-2256264@INTRON_60,
scaffold_106:1858895-1892268	scaffold_106:1887695-1887845	151	33.9	7	rps6ka1_NM_001123459_+_scaffold_106:1858848-1919668@INTRON_1,
scaffold_47:2835088-2854858	scaffold_47:2836238-2836338	101	31.4	7	dnajc1_NM_001011351_+_scaffold_47:2786186-2862473@INTRON_8,
scaffold_966:72041-107857	scaffold_966:74241-74341	101	30.5	7	fastkd3_NM_001142147_+_scaffold_966:71912-241109@INTRON_1,
scaffold_158:116811-119850	scaffold_158:118661-118761	101	30	7	anxa8_NM_001011246_-_scaffold_158:112916-138075@INTRON_2,
scaffold_17:1137134-1163956	scaffold_17:1146834-1147034	201	34.9	8	sgsm1_NM_001112951_+_scaffold_17:1115830-1186970@INTRON_3,
scaffold_17:1137134-1163956	scaffold_17:1143484-1143684	201	34.7	8	sgsm1_NM_001112951_+_scaffold_17:1115830-1186970@INTRON_3,
scaffold_152:1133018-1298212	scaffold_152:1151468-1151568	101	34.4	8	sirt4_NM_001045628_+_scaffold_152:1103851-1507544@INTRON_5,
scaffold_152:1133018-1298212	scaffold_152:1167318-1167418	101	33.3	8	sirt4_NM_001045628_+_scaffold_152:1103851-1507544@INTRON_5,
scaffold_86:784021-839682	scaffold_86:789471-789571	101	32.8	8	ptprd_NM_001126889_+_scaffold_86:472567-1283803@INTRON_5,
scaffold_146:1348335-1356485	scaffold_146:1353735-1353885	151	22.4	8	vrk3_NM_001044457_+_scaffold_146:1334063-1378280@INTRON_4,
scaffold_344:725160-732774	scaffold_344:726360-726560	201	38.5	9	LOC100158523_NM_001127960_+_scaffold_344:663538-753973@INTRON_11,
scaffold_151:112736-120759	scaffold_151:117986-118086	101	36.1	9	lin54_NM_001079122_-_scaffold_151:90197-153035@INTRON_8,
scaffold_247:1633157-1639535	scaffold_247:1634607-1634707	101	34.5	9	nid2_NM_001097263_+_scaffold_247:1597501-1643229@INTRON_17,
scaffold_666:319889-406169	scaffold_666:347339-347439	101	33.1	9	ncam2_NM_001127425_+_scaffold_666:319753-476644@INTRON_1,
scaffold_154:958812-972051	scaffold_154:964762-964912	151	32.1	9	atp2b3_NM_001131043_+_scaffold_154:878268-1011465@INTRON_6,
scaffold_6:5275425-5562513	scaffold_6:5528125-5528225	101	31	9	slc39a3_NM_001102697_-_scaffold_6:2781856-5867994@INTRON_12,
scaffold_139:534220-599125	scaffold_139:576170-576270	101	30.7	9	arhgap26_NM_001126773_+_scaffold_139:533849-810043@INTRON_1,
scaffold_113:862408-870407	scaffold_113:867958-868108	151	49.9	10	fcho2_NM_001142071_+_scaffold_113:832210-902166@INTRON_5,
scaffold_413:837962-845493	scaffold_413:842812-842912	101	34.2	10	capn13_NM_001008024_+_scaffold_413:823431-864323@INTRON_2,
scaffold_146:1348335-1356485	scaffold_146:1349185-1349285	101	33.2	10	vrk3_NM_001044457_+_scaffold_146:1334063-1378280@INTRON_4,
scaffold_343:448518-496568	scaffold_343:482868-482968	101	32.2	10	ccni_NM_001005690_+_scaffold_343:432412-503101@INTRON_2,
scaffold_717:181402-185443	scaffold_717:184952-185052	101	31.5	10	pcsk4_NM_001078893_+_scaffold_717:169683-196811@INTRON_3,
scaffold_135:1214666-1417655	scaffold_135:1236966-1237116	151	49.2	11	chd9_NM_001045586_+_scaffold_135:1214575-1809035@INTRON_1,
scaffold_498:655640-662655	scaffold_498:657340-657490	151	44.8	11	dmbt1_NM_001142217_+_scaffold_498:627850-712316@INTRON_4,
scaffold_498:655638-662662	scaffold_498:657338-657488	151	44.7	11	dmbt1_NM_001142217_+_scaffold_498:627814-662860@INTRON_5,
scaffold_498:655632-662656	scaffold_498:657332-657482	151	44.3	11	dmbt1_NM_001142217_+_scaffold_498:627796-662860@INTRON_5,
scaffold_228:189010-226125	scaffold_228:205160-205310	151	29.5	11	nedd4l_NM_001006726_+_scaffold_228:87196-270238@INTRON_5,
scaffold_429:17699-23139	scaffold_429:20499-20649	151	34.5	12	sox13_NM_001017004_-_scaffold_429:14899-129409@INTRON_2,
scaffold_7:41779-709718	scaffold_7:677529-677629	101	32.4	12	myo15a_NM_001100245_+_scaffold_7:41322-933681@INTRON_1,
scaffold_576:598979-647892	scaffold_576:637029-637129	101	31.2	12	uhrf1bp1l_NM_001130247_-_scaffold_576:598486-704443@INTRON_1,
scaffold_29:4088099-4319807	scaffold_29:4155749-4155849	101	30.6	12	foxf2_NM_001100232_-_scaffold_29:4087833-4319971@INTRON_3,
scaffold_446:730870-943514	scaffold_446:744420-744520	101	33.1	13	bin1_NM_203900_-_scaffold_446:399955-972588@INTRON_2,
scaffold_9:3125198-3173513	scaffold_9:3149298-3149398	101	31.1	13	cadm2_NM_001005713_+_scaffold_9:2310496-3241766@INTRON_7,
scaffold_5:4170507-4197822	scaffold_5:4195507-4195607	101	30.4	13	c9orf30_NM_001016739_+_scaffold_5:4170366-4254549@INTRON_1,
scaffold_17:1137134-1163956	scaffold_17:1144134-1144284	151	44.4	14	sgsm1_NM_001112951_+_scaffold_17:1115830-1186970@INTRON_3,
scaffold_26:2471076-3027687	scaffold_26:2516226-2516326	101	30.5	15	c1qtnf4_NM_001011345_-_scaffold_26:2470905-3738113@INTRON_1,
scaffold_27:2881946-3218674	scaffold_27:2994896-2994996	101	33.2	16	gdpd5_NM_001127121_+_scaffold_27:1776726-3883646@INTRON_8,
scaffold_59:3045562-3047920	scaffold_59:3045962-3046162	201	32.1	16	wdr19_NM_001123477_-_scaffold_59:3026085-3076705@INTRON_19,
scaffold_100:77372-130745	scaffold_100:88272-88372	101	30.1	16	vsnl1_NM_001078858_+_scaffold_100:77147-179648@INTRON_1,
scaffold_5:4489661-4654623	scaffold_5:4519061-4519211	151	27.5	16	ifit5_NM_001142188_-_scaffold_5:4404167-4654764@INTRON_3,
scaffold_95:360285-364815	scaffold_95:360985-361135	151	48.7	17	LOC100145511_NM_001126954_+_scaffold_95:350378-368730@INTRON_12,
scaffold_89:1056512-1062613	scaffold_89:1058312-1058412	101	34.8	17	larp7_NM_001045703_+_scaffold_89:1052783-1076917@INTRON_2,
scaffold_257:457987-486354	scaffold_257:478237-478337	101	33.3	17	kaz_NM_001097336_+_scaffold_257:426197-528316@INTRON_2,
scaffold_139:308278-345800	scaffold_139:333578-333728	151	31.8	17	sept8_NM_001122727_+_scaffold_139:308038-361485@INTRON_1,
scaffold_16:1547869-1803167	scaffold_16:1785069-1785169	101	44.6	18	ypel2_NM_001102689_+_scaffold_16:1547739-2300995@INTRON_1,
scaffold_110:219419-234179	scaffold_110:226969-227069	101	37.4	19	glrb_NM_001078787_+_scaffold_110:212736-270336@INTRON_2,
scaffold_51:777112-779510	scaffold_51:778162-778262	101	31.5	19	fap_NM_001113673_+_scaffold_51:755418-800322@INTRON_13,
scaffold_161:1081652-1213089	scaffold_161:1115802-1115902	101	31.3	19	pde1b_NM_001097267_-_scaffold_161:1040549-1225323@INTRON_14,
scaffold_95:360285-364815	scaffold_95:362185-362285	101	56.6	20	LOC100145511_NM_001126954_+_scaffold_95:350378-368730@INTRON_12,
scaffold_11:1221200-1223848	scaffold_11:1222300-1222400	101	32.6	20	LOC100127794_NM_001113111_-_scaffold_11:1190912-1226778@INTRON_15,
scaffold_410:727769-738725	scaffold_410:729419-729519	101	32.6	20	fam108a1_NM_001011208_-_scaffold_410:725770-741941@INTRON_2,
scaffold_450:608392-691641	scaffold_450:624742-624842	101	31.6	20	plcb1_NM_001079464_+_scaffold_450:589404-845985@INTRON_2,
scaffold_291:1247072-1287077	scaffold_291:1285922-1286072	151	30.4	20	tmeff2_NM_001097223_+_scaffold_291:1081209-1292027@INTRON_8,
scaffold_39:777757-810988	scaffold_39:791357-791507	151	22.6	20	fxyd6_NM_001103045_+_scaffold_39:777713-819461@INTRON_1,
scaffold_344:725160-732774	scaffold_344:728510-728660	151	49.6	21	LOC100158523_NM_001127960_+_scaffold_344:663538-753973@INTRON_11,
scaffold_34:3556578-3918839	scaffold_34:3914928-3915028	101	34.7	21	sirt4_NM_001045628_-_scaffold_34:2890969-3918895@INTRON_6,
scaffold_34:3912528-3920971	scaffold_34:3914928-3915028	101	34.7	21	oxnad1_NM_001102858_+_scaffold_34:3912470-3941283@INTRON_1,
scaffold_95:2187255-2290652	scaffold_95:2212755-2212855	101	34.7	21	tmem132d_NM_001113104_+_scaffold_95:2100100-2543069@INTRON_3,
scaffold_1177:37096-49492	scaffold_1177:39196-39296	101	34.7	22	rgs18_NM_001008091_+_scaffold_1177:31485-64014@INTRON_2,
scaffold_346:345819-350418	scaffold_346:346719-346819	101	34	22	cdk10_NM_001016575_-_scaffold_346:345200-361702@INTRON_1,
scaffold_108:1190306-1198768	scaffold_108:1197156-1197256	101	32.5	22	dtl_NM_204071_+_scaffold_108:1179007-1203155@INTRON_11,
scaffold_808:38407-110132	scaffold_808:73607-73707	101	30.6	22	LOC100127658_NM_001113002_+_scaffold_808:36610-110268@INTRON_2,
scaffold_73:174161-199502	scaffold_73:192261-192461	201	37.3	23	acot7_NM_001078900_-_scaffold_73:172879-284974@INTRON_1,
scaffold_5:4404500-4488457	scaffold_5:4462550-4462650	101	34.6	23	ifit5_NM_001142188_-_scaffold_5:4404167-4654764@INTRON_1,
scaffold_188:712226-787198	scaffold_188:749376-749476	101	33.3	23	banp_NM_203864_-_scaffold_188:703445-903409@INTRON_2,
scaffold_10:2382617-2391084	scaffold_10:2390117-2390217	101	30.2	23	gria3_NM_001113023_-_scaffold_10:2374712-2542530@INTRON_4,
scaffold_140:1200740-1215495	scaffold_140:1202290-1202490	201	37.3	24	tmeff1_NM_001100268_+_scaffold_140:1093531-1225056@INTRON_8,
scaffold_402:485648-504585	scaffold_402:488098-488198	101	36.4	24	wrb_NM_001006891_+_scaffold_402:460474-506212@INTRON_3,
scaffold_404:967815-970121	scaffold_404:969115-969215	101	36.3	24	shq1_NM_001079148_-_scaffold_404:917994-977269@INTRON_7,
scaffold_105:707861-710409	scaffold_105:709261-709361	101	36	24	cir1_NM_001016226_+_scaffold_105:707700-730539@INTRON_1,
scaffold_501:627409-629259	scaffold_501:627909-628109	201	37.1	25	nusap1_NM_001142902_+_scaffold_501:618444-632268@INTRON_9,
scaffold_44:3568560-3604330	scaffold_44:3596510-3596610	101	31.9	25	chodl_NM_001126877_-_scaffold_44:3555654-3604656@INTRON_5,
scaffold_386:645305-1101085	scaffold_386:1049755-1049955	201	40.6	26	ifit5_NM_001142188_-_scaffold_386:175917-1101219@INTRON_6,
scaffold_608:415468-440397	scaffold_608:429618-429768	151	30.6	26	plekha6_NM_001097246_+_scaffold_608:401920-654488@INTRON_3,
scaffold_508:678396-681622	scaffold_508:679646-679796	151	30.5	26	cyfip2_NM_001110053_-_scaffold_508:672185-726188@INTRON_7,
scaffold_124:485235-505423	scaffold_124:496735-496835	101	45.6	27	cbl_NM_001128638_+_scaffold_124:472751-524664@INTRON_2,
scaffold_63:886435-903872	scaffold_63:891235-891385	151	35.7	27	LOC100036663_NM_001097217_-_scaffold_63:876524-911486@INTRON_7,
scaffold_331:175308-493206	scaffold_331:385308-385458	151	29.3	27	opcml_NM_001079019_-_scaffold_331:51689-493354@INTRON_2,
scaffold_142:1422926-1439121	scaffold_142:1428226-1428326	101	39.7	28	mett10d_NM_001130217_-_scaffold_142:1401348-1440550@INTRON_7,
scaffold_17:1137134-1163956	scaffold_17:1143334-1143434	101	37.7	28	sgsm1_NM_001112951_+_scaffold_17:1115830-1186970@INTRON_3,
scaffold_17:1137134-1163956	scaffold_17:1146684-1146784	101	36.8	28	sgsm1_NM_001112951_+_scaffold_17:1115830-1186970@INTRON_3,
scaffold_140:1174760-1196345	scaffold_140:1180660-1180760	101	35.9	28	tmeff1_NM_001100268_+_scaffold_140:1093531-1225056@INTRON_5,
scaffold_20:4564815-4569193	scaffold_20:4566715-4566815	101	30.8	28	LOC100170619_NM_001130381_+_scaffold_20:4553369-4570187@INTRON_7,
scaffold_213:1400827-1453928	scaffold_213:1415227-1415327	101	40.5	29	lrrc16a_NM_001127140_+_scaffold_213:1393364-1497627@INTRON_2,
scaffold_396:1065276-1068978	scaffold_396:1066526-1066626	101	36.7	29	gabbr1_NM_001113819_+_scaffold_396:1023984-1091787@INTRON_8,
scaffold_71:349251-743059	scaffold_71:586801-587001	201	35.1	29	LOC779492_NM_001134807_-_scaffold_71:349196-795262@INTRON_1,
scaffold_140:1174760-1196345	scaffold_140:1177460-1177560	101	31.5	29	tmeff1_NM_001100268_+_scaffold_140:1093531-1225056@INTRON_5,
scaffold_113:347783-383094	scaffold_113:374983-375083	101	39	31	LOC733866_NM_001045606_+_scaffold_113:346199-387206@INTRON_2,
scaffold_380:356179-369084	scaffold_380:359029-359229	201	34	31	kcnmb4_NM_001017211_-_scaffold_380:338400-369481@INTRON_2,
scaffold_41:2998480-3017617	scaffold_41:3010780-3010880	101	33.8	31	arl8a_NM_203659_-_scaffold_41:2993235-3023340@INTRON_3,
scaffold_1037:75606-78362	scaffold_1037:77306-77406	101	32.6	31	fam3b_NM_001015990_+_scaffold_1037:60653-86115@INTRON_3,
scaffold_65:2829731-2872491	scaffold_65:2863681-2863781	101	30.5	32	LOC496503_NM_001011090_+_scaffold_65:2829210-2879255@INTRON_1,
scaffold_274:522226-541252	scaffold_274:534226-534376	151	29.7	32	fuca2_NM_001011291_+_scaffold_274:521936-557942@INTRON_1,
scaffold_177:1805021-1813835	scaffold_177:1811371-1811471	101	32.3	33	dnd1_NM_001044434_+_scaffold_177:1804920-1819289@INTRON_1,
scaffold_140:1094053-1144202	scaffold_140:1128103-1128203	101	32.2	33	tmeff1_NM_001100268_+_scaffold_140:1093531-1225056@INTRON_1,
scaffold_212:886618-932123	scaffold_212:917118-917218	101	31.2	33	crtac1_NM_001078905_-_scaffold_212:871594-1193156@INTRON_7,
scaffold_212:886618-932123	scaffold_212:905468-905568	101	31	33	crtac1_NM_001078905_-_scaffold_212:871594-1193156@INTRON_7,
scaffold_57:33461-86461	scaffold_57:59811-59911	101	30.6	35	hecw1_NM_001130278_-_scaffold_57:5049-86636@INTRON_5,
scaffold_5:4489661-4654623	scaffold_5:4518761-4518911	151	30	36	ifit5_NM_001142188_-_scaffold_5:4404167-4654764@INTRON_3,
scaffold_120:1104884-1224640	scaffold_120:1124284-1124384	101	33.8	37	cdh13_NM_001103078_+_scaffold_120:1104798-1600265@INTRON_1,
scaffold_666:319889-406169	scaffold_666:347589-347739	151	32	38	ncam2_NM_001127425_+_scaffold_666:319753-476644@INTRON_1,
scaffold_742:364243-371186	scaffold_742:365843-365993	151	31.6	38	tmbim4_NM_001004879_+_scaffold_742:364111-375553@INTRON_1,
scaffold_5:4404500-4488457	scaffold_5:4462150-4462250	101	33.2	39	ifit5_NM_001142188_-_scaffold_5:4404167-4654764@INTRON_1,
scaffold_285:638153-678851	scaffold_285:643553-643653	101	33.1	39	dis3l2_NM_001079336_-_scaffold_285:484828-716944@INTRON_16,
scaffold_693:437007-451173	scaffold_693:442807-442957	151	31.8	40	ptpn3_NM_001079462_+_scaffold_693:258466-490908@INTRON_15,
scaffold_591:448325-482368	scaffold_591:466675-466775	101	31.4	40	aip_NM_001102749_-_scaffold_591:412964-482482@INTRON_5,
scaffold_362:583499-609210	scaffold_362:587299-587399	101	39.3	42	btn2a1_NM_001130216_+_scaffold_362:580426-719713@INTRON_2,
scaffold_194:148970-151844	scaffold_194:150470-150620	151	31.1	42	adprhl2_NM_001016184_+_scaffold_194:141645-156442@INTRON_3,
scaffold_321:910628-940104	scaffold_321:917778-917878	101	48.4	43	txndc9_NM_001079070_+_scaffold_321:909787-940279@INTRON_1,
scaffold_498:655640-662655	scaffold_498:657090-657290	201	36.6	43	dmbt1_NM_001142217_+_scaffold_498:627850-712316@INTRON_4,
scaffold_386:645305-1101085	scaffold_386:1037905-1038105	201	36.4	43	ifit5_NM_001142188_-_scaffold_386:175917-1101219@INTRON_6,
scaffold_2:1774377-1792737	scaffold_2:1784027-1784127	101	33.4	43	pms1_NM_001142901_-_scaffold_2:1724336-1805884@INTRON_9,
scaffold_212:886618-932123	scaffold_212:901718-901818	101	31.2	43	crtac1_NM_001078905_-_scaffold_212:871594-1193156@INTRON_7,
scaffold_185:1090116-1093316	scaffold_185:1092016-1092166	151	30.6	43	ak7_NM_001011352_-_scaffold_185:1079612-1106097@INTRON_5,
scaffold_868:267219-279696	scaffold_868:272169-272319	151	38.5	44	ddx10_NM_001102681_-_scaffold_868:265736-327322@INTRON_1,
scaffold_498:655638-662662	scaffold_498:657088-657288	201	36.4	44	dmbt1_NM_001142217_+_scaffold_498:627814-662860@INTRON_5,
scaffold_35:880734-885378	scaffold_35:882034-882184	151	44	45	cask_NM_001016204_+_scaffold_35:738621-911918@INTRON_20,
scaffold_498:655632-662656	scaffold_498:657082-657282	201	35.6	45	dmbt1_NM_001142217_+_scaffold_498:627796-662860@INTRON_5,
scaffold_536:202072-249508	scaffold_536:234372-234472	101	33.1	45	vopp1_NM_001078958_+_scaffold_536:201682-267313@INTRON_1,
scaffold_106:2016533-2455418	scaffold_106:2027883-2027983	101	31.2	45	slc39a3_NM_001102697_-_scaffold_106:83848-2455684@INTRON_11,
scaffold_187:83009-181801	scaffold_187:101509-101609	101	30.2	46	st6galnac5_NM_001172277_-_scaffold_187:70083-182834@INTRON_3,
scaffold_106:2023436-2032115	scaffold_106:2027886-2027986	101	31.1	47	gpatch3_NM_001126999_-_scaffold_106:2022823-2037216@INTRON_2,
scaffold_41:148571-157587	scaffold_41:150721-150821	101	43	49	tulp1_NM_001016482_-_scaffold_41:125078-229182@INTRON_8,
scaffold_166:1685858-1692527	scaffold_166:1691008-1691108	101	37.4	49	tmem229b_NM_001078851_-_scaffold_166:1676257-1696933@INTRON_3,
scaffold_29:2248772-2260692	scaffold_29:2254122-2254222	101	31.4	49	elac2_NM_001045621_+_scaffold_29:2225891-2268827@INTRON_8,
scaffold_25:3685563-3754441	scaffold_25:3706913-3707063	151	22.8	49	eml4_NM_001006916_-_scaffold_25:3640010-3754496@INTRON_21,
scaffold_554:4160-21822	scaffold_554:9810-9910	101	43.8	50	pcsk5_NM_001079038_-_scaffold_554:4070-92883@INTRON_1,
scaffold_380:242102-252618	scaffold_380:249802-249952	151	35	50	ptprr_NM_001103009_+_scaffold_380:169719-253233@INTRON_13,
scaffold_745:307168-440183	scaffold_745:357318-357418	101	31.3	50	slc47a2_NM_001102970_-_scaffold_745:306883-440449@INTRON_1,
scaffold_106:84779-503722	scaffold_106:149679-149779	101	30.3	50	slc39a3_NM_001102697_-_scaffold_106:83848-2455684@INTRON_4,
scaffold_35:845261-864998	scaffold_35:853911-854061	151	44	51	cask_NM_001016204_+_scaffold_35:738621-911918@INTRON_11,
scaffold_152:1104097-1111514	scaffold_152:1110947-1111097	151	39.8	51	sirt4_NM_001045628_+_scaffold_152:1103851-1507544@INTRON_3,
scaffold_434:244533-323809	scaffold_434:303683-303833	151	23.8	51	nhsl1_NM_001142125_-_scaffold_434:147209-324347@INTRON_6,
scaffold_729:57478-368440	scaffold_729:80828-80928	101	32.2	52	rab11fip4_NM_001102700_+_scaffold_729:15260-369371@INTRON_3,
scaffold_220:659-11128	scaffold_220:2259-2409	151	24.8	52	h6pd_NM_001113034_+_scaffold_220:538-15066@INTRON_1,
scaffold_2:718336-738075	scaffold_2:721086-721236	151	24	52	calcrl_NM_001016893_-_scaffold_2:661304-786245@INTRON_11,
scaffold_5:4489661-4654623	scaffold_5:4586361-4586511	151	23.4	52	ifit5_NM_001142188_-_scaffold_5:4404167-4654764@INTRON_3,
scaffold_429:76091-111947	scaffold_429:95791-95941	151	23.3	52	sox13_NM_001017004_-_scaffold_429:14899-129409@INTRON_13,
scaffold_247:1633157-1639535	scaffold_247:1638607-1638757	151	39.3	53	nid2_NM_001097263_+_scaffold_247:1597501-1643229@INTRON_17,
scaffold_466:85289-98927	scaffold_466:93789-93889	101	35.5	53	itfg3_NM_001128045_+_scaffold_466:62845-111736@INTRON_5,
scaffold_402:485648-504585	scaffold_402:488298-488448	151	35.2	53	wrb_NM_001006891_+_scaffold_402:460474-506212@INTRON_3,
scaffold_448:561248-908490	scaffold_448:800748-800848	101	36.5	54	cdkn2d_NM_001079371_+_scaffold_448:537564-908837@INTRON_7,
scaffold_493:584132-864048	scaffold_493:785432-785532	101	35	54	LOC100037835_NM_001114850_-_scaffold_493:557105-866867@INTRON_2,
scaffold_73:3169429-3172764	scaffold_73:3169879-3169979	101	34.5	54	arhgef16_NM_001016860_-_scaffold_73:3155519-3172856@INTRON_11,
scaffold_212:886618-932123	scaffold_212:924668-924768	101	30.8	54	crtac1_NM_001078905_-_scaffold_212:871594-1193156@INTRON_7,
scaffold_380:657363-678018	scaffold_380:659863-659963	101	33.1	55	frs2_NM_001134809_-_scaffold_380:645579-678062@INTRON_6,
scaffold_331:175308-493206	scaffold_331:465558-465658	101	30.1	55	opcml_NM_001079019_-_scaffold_331:51689-493354@INTRON_2,
scaffold_387:527088-553737	scaffold_387:532988-533088	101	30.1	55	ifngr1_NM_001079346_+_scaffold_387:526819-603105@INTRON_1,
scaffold_291:447209-465196	scaffold_291:453809-453909	101	43.9	56	dnajb11_NM_203849_-_scaffold_291:409790-496794@INTRON_5,
scaffold_106:1587520-1602002	scaffold_106:1588070-1588170	101	30.5	56	ccdc21_NM_001126536_+_scaffold_106:1570291-1602473@INTRON_8,
scaffold_466:62931-73675	scaffold_466:68781-68881	101	39.3	57	itfg3_NM_001128045_+_scaffold_466:62845-111736@INTRON_1,
scaffold_219:546590-572084	scaffold_219:569040-569140	101	35.2	57	prss23_NM_001113120_+_scaffold_219:546432-573623@INTRON_1,
scaffold_443:134292-157190	scaffold_443:151092-151192	101	34.8	58	ttc39b_NM_001016802_-_scaffold_443:115739-170626@INTRON_17,
scaffold_262:141139-149161	scaffold_262:143039-143139	101	35.5	59	eif2a_NM_001127089_-_scaffold_262:135631-167889@INTRON_3,
scaffold_716:451835-488014	scaffold_716:478735-478835	101	33.4	60	chmp5_NM_001015720_-_scaffold_716:423203-501699@INTRON_3,
scaffold_716:451835-488014	scaffold_716:478735-478835	101	33.4	60	chmp5_NM_001016748_-_scaffold_716:423199-501699@INTRON_3,
scaffold_508:633164-639630	scaffold_508:635764-635914	151	33.3	60	adam19_NM_001040016_-_scaffold_508:608207-643432@INTRON_19,
scaffold_212:886618-932123	scaffold_212:921818-921918	101	33.2	61	crtac1_NM_001078905_-_scaffold_212:871594-1193156@INTRON_7,
scaffold_152:1104097-1111514	scaffold_152:1109297-1109447	151	32.5	61	sirt4_NM_001045628_+_scaffold_152:1103851-1507544@INTRON_3,
scaffold_40:152248-167005	scaffold_40:165148-165248	101	46.1	63	map2k5_NM_001016288_+_scaffold_40:134662-203854@INTRON_8,
scaffold_20:2523211-2649807	scaffold_20:2607811-2607961	151	25.6	63	LOC100124962_NM_001102899_-_scaffold_20:2391477-2650233@INTRON_3,
scaffold_5:5759398-6142373	scaffold_5:6038598-6038748	151	25.1	63	dis3l2_NM_001079336_+_scaffold_5:5759292-6164148@INTRON_2,
scaffold_9:2310906-3030103	scaffold_9:2601706-2601806	101	35.3	65	cadm2_NM_001005713_+_scaffold_9:2310496-3241766@INTRON_1,
scaffold_704:484350-487694	scaffold_704:486650-486750	101	38.1	68	adad1_NM_001123473_-_scaffold_704:475233-495148@INTRON_5,
scaffold_119:2541965-2551566	scaffold_119:2550415-2550515	101	35.2	69	ddx10_NM_001102681_+_scaffold_119:2541739-2595489@INTRON_1,
scaffold_66:255317-283223	scaffold_66:278717-278817	101	31	74	slc47a2_NM_001102970_+_scaffold_66:249696-283544@INTRON_2,
scaffold_106:919420-1309606	scaffold_106:1096420-1096570	151	24.7	74	slc39a3_NM_001102697_-_scaffold_106:83848-2455684@INTRON_7,
scaffold_118:804765-933145	scaffold_118:817565-817665	101	39.7	76	fam189a1_NM_001078904_+_scaffold_118:804096-1122860@INTRON_1,
scaffold_90:93446-289130	scaffold_90:96896-96996	101	39.7	77	syt4_NM_001171514_-_scaffold_90:93400-289196@INTRON_1,
scaffold_13:3160394-3254301	scaffold_13:3232344-3232444	101	39.5	77	dach1_NM_001078708_+_scaffold_13:3159588-3365066@INTRON_1,
scaffold_106:84779-503722	scaffold_106:218979-219079	101	39.5	77	slc39a3_NM_001102697_-_scaffold_106:83848-2455684@INTRON_4,
scaffold_113:347783-383094	scaffold_113:382683-382783	101	39.5	77	LOC733866_NM_001045606_+_scaffold_113:346199-387206@INTRON_2,
scaffold_194:148970-151844	scaffold_194:150220-150320	101	39.8	78	adprhl2_NM_001016184_+_scaffold_194:141645-156442@INTRON_3,
scaffold_612:326623-340674	scaffold_612:335073-335173	101	36.3	78	fam118b_NM_001005046_-_scaffold_612:325999-373583@INTRON_1,
scaffold_15:1300601-1340044	scaffold_15:1304701-1304801	101	32.7	83	ramp1_NM_001079345_-_scaffold_15:1290767-1340139@INTRON_2,
scaffold_69:1972748-2785795	scaffold_69:2285498-2285598	101	31.5	83	sh2b3_NM_001100247_+_scaffold_69:1972551-2786447@INTRON_1,
scaffold_41:59181-96024	scaffold_41:65881-65981	101	35.1	85	smpd2_NM_001126737_-_scaffold_41:15656-96096@INTRON_10,
scaffold_106:2173948-2175005	scaffold_106:2174398-2174498	101	30.8	86	sytl1_NM_001006772_-_scaffold_106:2161280-2187639@INTRON_10,
scaffold_27:2399913-2881939	scaffold_27:2684563-2684663	101	32.6	90	gdpd5_NM_001127121_+_scaffold_27:1776726-3883646@INTRON_7,
scaffold_573:291154-577850	scaffold_573:438904-439004	101	32.5	90	myo15a_NM_001100245_-_scaffold_573:284514-577897@INTRON_3,
scaffold_143:1142813-1679949	scaffold_143:1486963-1487063	101	30.1	91	myo15a_NM_001100245_-_scaffold_143:88388-1680404@INTRON_8,
scaffold_642:363293-403476	scaffold_642:392193-392293	101	34.2	92	gc_NM_001017165_-_scaffold_642:355296-403558@INTRON_6,
scaffold_642:363293-403476	scaffold_642:392193-392293	101	34.2	92	gc_NM_001015745_-_scaffold_642:331999-403555@INTRON_12,
scaffold_466:462919-517455	scaffold_466:487769-487869	101	32.6	93	tmem11_NM_001016689_-_scaffold_466:462102-517505@INTRON_1,
scaffold_79:2621157-2633042	scaffold_79:2631657-2631757	101	39.9	95	b4galt1.1_NM_001126960_-_scaffold_79:2604932-2659367@INTRON_4,
scaffold_797:237280-353058	scaffold_797:272330-272430	101	32.5	95	odz4_NM_001102688_-_scaffold_797:49353-361907@INTRON_27,
scaffold_127:561688-738543	scaffold_127:702438-702538	101	36.8	99	celf4_NM_001078910_-_scaffold_127:7653-738884@INTRON_12,
scaffold_5:4198259-4243079	scaffold_5:4212459-4212559	101	32.1	99	c9orf30_NM_001016739_+_scaffold_5:4170366-4254549@INTRON_2,
scaffold_79:812233-1375476	scaffold_79:1306233-1306333	101	36.8	100	slc39a3_NM_001102697_+_scaffold_79:680766-2284175@INTRON_2,
scaffold_29:2248772-2260692	scaffold_29:2253622-2253722	101	36.5	101	elac2_NM_001045621_+_scaffold_29:2225891-2268827@INTRON_8,
scaffold_5:2713065-2733757	scaffold_5:2723665-2723765	101	32.9	102	tmtc2_NM_001102686_+_scaffold_5:2577670-2738408@INTRON_11,
scaffold_190:1658215-1943970	scaffold_190:1794815-1794915	101	31.9	104	c3p1_NR_033392_-_scaffold_190:1643590-1945983@INTRON_5,
scaffold_34:3556578-3918839	scaffold_34:3835728-3835828	101	31.7	105	sirt4_NM_001045628_-_scaffold_34:2890969-3918895@INTRON_6,
scaffold_491:286098-330911	scaffold_491:296398-296498	101	41.9	110	kcnh5_NM_001127437_+_scaffold_491:213159-358278@INTRON_7,
scaffold_291:1247072-1287077	scaffold_291:1278222-1278322	101	33.8	111	tmeff2_NM_001097223_+_scaffold_291:1081209-1292027@INTRON_8,
scaffold_357:1126165-1148074	scaffold_357:1131015-1131115	101	31.8	112	nprl3_NM_001102803_+_scaffold_357:1121548-1183964@INTRON_2,
scaffold_26:2471076-3027687	scaffold_26:2811926-2812026	101	31	112	c1qtnf4_NM_001011345_-_scaffold_26:2470905-3738113@INTRON_1,
scaffold_41:201101-229123	scaffold_41:201501-201601	101	30.1	112	tulp1_NM_001016482_-_scaffold_41:125078-229182@INTRON_12,
scaffold_9:2310906-3030103	scaffold_9:2935606-2935706	101	32.9	113	cadm2_NM_001005713_+_scaffold_9:2310496-3241766@INTRON_1,
scaffold_744:92799-95859	scaffold_744:94349-94449	101	32.9	113	ppt2_NM_001100218_-_scaffold_744:84436-103576@INTRON_4,
scaffold_113:347783-383094	scaffold_113:374383-374483	101	32.1	115	LOC733866_NM_001045606_+_scaffold_113:346199-387206@INTRON_2,
scaffold_742:364243-371186	scaffold_742:366643-366743	101	33.5	116	tmbim4_NM_001004879_+_scaffold_742:364111-375553@INTRON_1,
scaffold_8:3677203-3711393	scaffold_8:3682503-3682603	101	33.1	116	pcsk2_NM_001097191_+_scaffold_8:3676804-3764327@INTRON_1,
scaffold_157:113428-130422	scaffold_157:121028-121128	101	33.5	117	rnasen_NM_001113680_+_scaffold_157:14737-169466@INTRON_20,
scaffold_85:1375936-1386330	scaffold_85:1379286-1379386	101	33.4	117	nos1ap_NM_001079247_+_scaffold_85:1375752-1422224@INTRON_1,
scaffold_152:817256-823437	scaffold_152:819856-819956	101	33.4	118	slc25a46_NM_001016130_-_scaffold_152:813546-833472@INTRON_2,
scaffold_79:2633278-2658690	scaffold_79:2634278-2634378	101	33.3	118	b4galt1.1_NM_001126960_-_scaffold_79:2604932-2659367@INTRON_5,
scaffold_826:250790-255268	scaffold_826:253590-253690	101	33.3	118	g3bp1_NM_001017046_+_scaffold_826:250718-265136@INTRON_1,
scaffold_113:347783-383094	scaffold_113:376383-376483	101	32.1	118	LOC733866_NM_001045606_+_scaffold_113:346199-387206@INTRON_2,
scaffold_1393:70911-76360	scaffold_1393:75911-76011	101	36.6	119	uxs1_NM_001006848_-_scaffold_1393:56287-76718@INTRON_10,
scaffold_56:3492389-3497078	scaffold_56:3494639-3494739	101	30.8	121	fam126a_NM_001079289_+_scaffold_56:3474990-3525553@INTRON_2,
scaffold_6:3500866-3876859	scaffold_6:3633816-3633916	101	30.5	123	slc39a3_NM_001102697_-_scaffold_6:2781856-5867994@INTRON_7,
scaffold_34:2891058-3302201	scaffold_34:2998358-2998458	101	31.7	124	sirt4_NM_001045628_-_scaffold_34:2890969-3918895@INTRON_1,
scaffold_492:148405-153066	scaffold_492:151505-151605	101	31.4	126	yrdc_NM_001015837_-_scaffold_492:146654-155990@INTRON_3,
scaffold_310:953740-1084948	scaffold_310:972640-972740	101	33	127	shisa9_NM_001112925_+_scaffold_310:905309-1094386@INTRON_2,
scaffold_37:1268082-1273443	scaffold_37:1271332-1271432	101	31.6	127	scfd1_NM_001142036_-_scaffold_37:1263357-1313072@INTRON_5,
scaffold_421:722262-724349	scaffold_421:723012-723162	151	34.1	128	ttc35_NM_001011398_+_scaffold_421:699230-736516@INTRON_9,
scaffold_452:524046-526484	scaffold_452:525596-525696	101	32	128	wwp1_NM_001097375_-_scaffold_452:523583-583097@INTRON_1,
scaffold_466:471448-491205	scaffold_466:487748-487848	101	31.3	128	c17orf103_NM_001008089_-_scaffold_466:469816-517507@INTRON_1,
scaffold_106:84779-503722	scaffold_106:218079-218179	101	31	128	slc39a3_NM_001102697_-_scaffold_106:83848-2455684@INTRON_4,
scaffold_34:920777-927629	scaffold_34:922177-922277	101	33.1	129	epb49_NM_001015862_+_scaffold_34:913149-931499@INTRON_8,
scaffold_321:512108-535782	scaffold_321:526108-526208	101	33.1	129	lonrf2_NM_001045693_+_scaffold_321:511091-553162@INTRON_1,
scaffold_841:23272-82437	scaffold_841:69322-69422	101	33.1	129	ralyl_NM_001078745_+_scaffold_841:23180-232688@INTRON_1,
scaffold_213:1664246-1708295	scaffold_213:1689946-1690046	101	32.4	129	pard6g_NM_001017338_+_scaffold_213:1643597-1711180@INTRON_2,
scaffold_244:1044616-1059142	scaffold_244:1055366-1055466	101	32.4	129	LOC100170569_NM_001130346_+_scaffold_244:1044538-1338765@INTRON_1,
scaffold_96:43575-56810	scaffold_96:54725-54825	101	36.4	130	stk3_NM_001097196_-_scaffold_96:13523-135736@INTRON_2,
scaffold_741:236807-277304	scaffold_741:254707-254807	101	32	131	galr1_NM_001113883_-_scaffold_741:207376-278089@INTRON_2,
scaffold_301:503487-517203	scaffold_301:510337-510437	101	31.4	131	ptprs_NM_001141992_+_scaffold_301:463997-609567@INTRON_3,
scaffold_79:2621157-2633042	scaffold_79:2625607-2625757	151	35.1	132	b4galt1.1_NM_001126960_-_scaffold_79:2604932-2659367@INTRON_4,
scaffold_18:4315754-4323712	scaffold_18:4317554-4317654	101	32.3	133	arc3_NM_001127127_-_scaffold_18:4256340-4323798@INTRON_14,
scaffold_434:681384-724135	scaffold_434:715484-715584	101	31.2	133	reps1_NM_001045730_-_scaffold_434:505856-760350@INTRON_13,
scaffold_139:667166-681034	scaffold_139:670016-670166	151	34.3	134	arhgap26_NM_001126773_+_scaffold_139:533849-810043@INTRON_14,
scaffold_67:105591-108554	scaffold_67:106291-106391	101	31.8	134	dctn2_NM_001015706_-_scaffold_67:89753-108778@INTRON_13,
scaffold_228:189010-226125	scaffold_228:205810-205910	101	32.5	135	nedd4l_NM_001006726_+_scaffold_228:87196-270238@INTRON_5,
scaffold_511:81391-105420	scaffold_511:97741-97891	151	33.7	137	homer2_NM_001016054_+_scaffold_511:50185-138050@INTRON_2,
scaffold_744:92799-95859	scaffold_744:94549-94699	151	29.4	137	ppt2_NM_001100218_-_scaffold_744:84436-103576@INTRON_4,
scaffold_44:592095-596410	scaffold_44:593795-593895	101	35.2	138	LOC100170549_NM_001130326_+_scaffold_44:544088-608353@INTRON_25,
scaffold_57:2773426-2837423	scaffold_57:2788976-2789076	101	35.2	138	grb10_NM_001127409_-_scaffold_57:2718766-2849227@INTRON_15,
scaffold_446:730870-943514	scaffold_446:744170-744270	101	35.2	138	bin1_NM_203900_-_scaffold_446:399955-972588@INTRON_2,
scaffold_122:828601-844241	scaffold_122:837501-837601	101	34.8	138	ntrk2_NM_001079185_+_scaffold_122:812504-926411@INTRON_6,
scaffold_6:5923174-5934115	scaffold_6:5931274-5931424	151	32	139	itfg1_NM_001017040_+_scaffold_6:5894391-5934238@INTRON_8,
scaffold_79:812233-1375476	scaffold_79:1056133-1056283	151	31.9	139	slc39a3_NM_001102697_+_scaffold_79:680766-2284175@INTRON_2,
scaffold_17:5006005-5010785	scaffold_17:5009955-5010105	151	29.9	139	pxn_NM_001142032_-_scaffold_17:4986579-5025954@INTRON_9,
scaffold_190:1658215-1943970	scaffold_190:1665165-1665265	101	30.7	141	c3p1_NR_033392_-_scaffold_190:1643590-1945983@INTRON_5,
scaffold_31:3163864-3255325	scaffold_31:3224764-3224864	101	35.6	144	c1qtnf4_NM_001011345_-_scaffold_31:2677041-3702719@INTRON_6,
scaffold_805:331206-405572	scaffold_805:344206-344306	101	35.2	144	LOC100158595_NM_001128022_+_scaffold_805:330978-407750@INTRON_1,
scaffold_687:338420-341111	scaffold_687:339820-339920	101	34.6	150	agbl5_NM_001126731_-_scaffold_687:315439-352602@INTRON_11,
scaffold_71:349251-743059	scaffold_71:653401-653501	101	31.6	153	LOC779492_NM_001134807_-_scaffold_71:349196-795262@INTRON_1,
scaffold_29:2528002-2531940	scaffold_29:2528702-2528802	101	33.9	160	aarsd1_NM_001142040_-_scaffold_29:2503680-2531994@INTRON_9,
scaffold_95:2184035-2245205	scaffold_95:2213235-2213335	101	30.4	160	gmds_NM_001037253_+_scaffold_95:2116652-2469750@INTRON_5,
scaffold_578:571597-667011	scaffold_578:605147-605247	101	36.5	162	LOC733855_NM_001045601_+_scaffold_578:490506-667922@INTRON_4,
scaffold_856:119826-124849	scaffold_856:121676-121776	101	32.6	162	arl10b_NM_001016111_-_scaffold_856:109977-131350@INTRON_4,
scaffold_19:2806310-2855805	scaffold_19:2831610-2831710	101	30.7	162	sirt4_NM_001045628_-_scaffold_19:2806221-3055736@INTRON_1,
scaffold_17:1116040-1137058	scaffold_17:1118390-1118490	101	34.2	165	sgsm1_NM_001112951_+_scaffold_17:1115830-1186970@INTRON_2,
scaffold_693:396017-414306	scaffold_693:409967-410067	101	33.6	187	ptpn3_NM_001079462_+_scaffold_693:258466-490908@INTRON_9,
scaffold_160:2043270-2089040	scaffold_160:2060820-2060920	101	38.5	203	ubac2_NM_001172293_+_scaffold_160:2036782-2110980@INTRON_4,
scaffold_1116:85885-89002	scaffold_1116:86535-86635	101	31.3	204	dennd5a_NM_001127996_-_scaffold_1116:73507-94910@INTRON_16,
scaffold_729:57478-368440	scaffold_729:133828-133928	101	30.8	204	rab11fip4_NM_001102700_+_scaffold_729:15260-369371@INTRON_3,
scaffold_1024:93332-98546	scaffold_1024:95632-95732	101	30.8	206	uqcrc1_NM_001016710_+_scaffold_1024:91957-106518@INTRON_2,
scaffold_26:2471076-3027687	scaffold_26:2813526-2813626	101	37.3	207	c1qtnf4_NM_001011345_-_scaffold_26:2470905-3738113@INTRON_1,
scaffold_79:1631046-1680578	scaffold_79:1665796-1665896	101	31.8	207	slc39a3_NM_001102697_+_scaffold_79:680766-2284175@INTRON_8,
scaffold_1336:17975-30126	scaffold_1336:26225-26325	101	31.8	207	utp6_NM_001016855_+_scaffold_1336:6641-30692@INTRON_14,
scaffold_448:561248-908490	scaffold_448:877248-877348	101	31.4	208	cdkn2d_NM_001079371_+_scaffold_448:537564-908837@INTRON_7,
scaffold_380:242102-252618	scaffold_380:248502-248602	101	31.6	209	ptprr_NM_001103009_+_scaffold_380:169719-253233@INTRON_13,
scaffold_448:561248-908490	scaffold_448:874998-875098	101	31.6	209	cdkn2d_NM_001079371_+_scaffold_448:537564-908837@INTRON_7,
scaffold_42:102332-108364	scaffold_42:105182-105282	101	31.4	209	cul4a_NM_001015893_-_scaffold_42:88808-121952@INTRON_10,
scaffold_244:1108985-1336918	scaffold_244:1166885-1166985	101	33.9	213	LOC100170569_NM_001130346_+_scaffold_244:1044538-1338765@INTRON_3,
scaffold_146:2012097-2124496	scaffold_146:2058147-2058247	101	33.5	213	fto_NM_001017273_+_scaffold_146:1931427-2124756@INTRON_8,
scaffold_331:175308-493206	scaffold_331:231858-231958	101	33.5	213	opcml_NM_001079019_-_scaffold_331:51689-493354@INTRON_2,
scaffold_86:905441-1079654	scaffold_86:1036341-1036441	101	32.6	214	ptprd_NM_001126889_+_scaffold_86:472567-1283803@INTRON_7,
scaffold_105:2616215-2619010	scaffold_105:2617565-2617665	101	32.6	214	mettl5_NM_001030492_+_scaffold_105:2615859-2624024@INTRON_2,
scaffold_578:571597-667011	scaffold_578:605397-605497	101	32.6	214	LOC733855_NM_001045601_+_scaffold_578:490506-667922@INTRON_4,
scaffold_1393:70911-76360	scaffold_1393:75661-75761	101	32.6	214	uxs1_NM_001006848_-_scaffold_1393:56287-76718@INTRON_10,
scaffold_269:910482-958036	scaffold_269:948132-948232	101	32.2	214	pdss2_NM_001008169_-_scaffold_269:849289-959185@INTRON_7,
scaffold_123:2243904-2519751	scaffold_123:2294804-2294904	101	38.3	215	gatad1_NM_001170506_+_scaffold_123:2243843-2573111@INTRON_1,
scaffold_194:1249573-1254270	scaffold_194:1253173-1253273	101	34.7	215	LOC779492_NM_001134807_+_scaffold_194:1249536-1323556@INTRON_1,
scaffold_319:622432-651839	scaffold_319:632432-632532	101	38.3	217	dlg1_NM_001045651_-_scaffold_319:569766-679639@INTRON_20,
scaffold_331:175308-493206	scaffold_331:232608-232708	101	30.1	220	opcml_NM_001079019_-_scaffold_331:51689-493354@INTRON_2,
scaffold_161:1081652-1213089	scaffold_161:1184102-1184202	101	35.5	225	pde1b_NM_001097267_-_scaffold_161:1040549-1225323@INTRON_14,
scaffold_130:1214865-1217348	scaffold_130:1216965-1217065	101	37.2	230	ccnt1_NM_001129933_-_scaffold_130:1210237-1226483@INTRON_1,
scaffold_86:620240-757373	scaffold_86:633740-633840	101	37	231	ptprd_NM_001126889_+_scaffold_86:472567-1283803@INTRON_3,
scaffold_841:23272-82437	scaffold_841:69572-69672	101	36.5	257	ralyl_NM_001078745_+_scaffold_841:23180-232688@INTRON_1,
scaffold_269:910482-958036	scaffold_269:947882-947982	101	36.4	259	pdss2_NM_001008169_-_scaffold_269:849289-959185@INTRON_7,
scaffold_86:1625606-1637888	scaffold_86:1628606-1628706	101	30.2	266	kdm4c_NM_001112998_-_scaffold_86:1605645-1715329@INTRON_7,
scaffold_14:1978799-1982106	scaffold_14:1980749-1980849	101	31.2	269	baiap2l1_NM_001100227_+_scaffold_14:1942450-1989744@INTRON_8,
scaffold_18:4987141-4993284	scaffold_18:4989241-4989341	101	31.2	269	ppp1r12b_NM_001079292_+_scaffold_18:4973917-5010486@INTRON_2,
scaffold_93:2785927-2815344	scaffold_93:2792727-2792827	101	30.9	269	pdlim4_NM_203920_-_scaffold_93:2759335-2849571@INTRON_5,
scaffold_402:485648-504585	scaffold_402:487648-487748	101	30.8	269	wrb_NM_001006891_+_scaffold_402:460474-506212@INTRON_3,
scaffold_220:1670964-1686938	scaffold_220:1683464-1683564	101	30.1	269	prkcz_NM_001100265_-_scaffold_220:1599873-1708643@INTRON_15,
scaffold_146:1966549-1974026	scaffold_146:1972599-1972699	101	30	269	fto_NM_001017273_+_scaffold_146:1931427-2124756@INTRON_4,
scaffold_466:62931-73675	scaffold_466:65981-66081	101	36.8	272	itfg3_NM_001128045_+_scaffold_466:62845-111736@INTRON_1,
scaffold_186:885898-1268142	scaffold_186:1158998-1159098	101	36.5	272	LOC549932_NM_001017178_-_scaffold_186:804103-1268179@INTRON_3,
scaffold_86:1625606-1637888	scaffold_86:1629056-1629156	101	36.4	272	kdm4c_NM_001112998_-_scaffold_86:1605645-1715329@INTRON_7,
scaffold_34:4086852-4132362	scaffold_34:4123552-4123652	101	35.7	274	rftn1_NM_001113084_-_scaffold_34:3959959-4153862@INTRON_7,
scaffold_343:158368-181270	scaffold_343:165268-165368	101	36.6	275	fzr1_NM_001126529_-_scaffold_343:89124-181396@INTRON_11,
scaffold_3:4262755-4267822	scaffold_3:4266105-4266205	101	36.8	276	prkci_NM_001012689_+_scaffold_3:4237318-4277970@INTRON_10,
scaffold_244:1108985-1336918	scaffold_244:1239235-1239335	101	36.8	276	LOC100170569_NM_001130346_+_scaffold_244:1044538-1338765@INTRON_3,
scaffold_16:1958218-2300589	scaffold_16:2226868-2226968	101	36.3	276	ypel2_NM_001102689_+_scaffold_16:1547739-2300995@INTRON_4,
scaffold_599:138827-145278	scaffold_599:143827-143927	101	36.3	276	ube2j1_NM_001011167_-_scaffold_599:126311-145317@INTRON_7,
scaffold_1021:30384-45028	scaffold_1021:38134-38234	101	33.1	276	erlin1_NM_001016892_-_scaffold_1021:28721-125814@INTRON_2,
scaffold_127:561688-738543	scaffold_127:703288-703388	101	37.1	345	celf4_NM_001078910_-_scaffold_127:7653-738884@INTRON_12,
scaffold_27:1828251-2067648	scaffold_27:1872101-1872201	101	30.5	350	gdpd5_NM_001127121_+_scaffold_27:1776726-3883646@INTRON_5,
scaffold_52:3314439-3374294	scaffold_52:3325739-3325839	101	30.5	350	dgkb_NM_001102744_+_scaffold_52:3184081-3450535@INTRON_19,
scaffold_20:2523211-2649807	scaffold_20:2608111-2608211	101	32.1	354	LOC100124962_NM_001102899_-_scaffold_20:2391477-2650233@INTRON_3,
scaffold_34:2891058-3302201	scaffold_34:3267408-3267508	101	34.6	356	sirt4_NM_001045628_-_scaffold_34:2890969-3918895@INTRON_1,
scaffold_79:1663657-1670677	scaffold_79:1665757-1665857	101	34.3	356	antxr2_NM_001127988_+_scaffold_79:1640370-1744604@INTRON_7,
scaffold_243:1265979-1268196	scaffold_243:1266729-1266829	101	33.1	356	cdc25c_NM_001114496_+_scaffold_243:1253986-1275553@INTRON_11,
scaffold_298:388448-390691	scaffold_298:388798-388898	101	33.2	358	plod1_NM_001078872_+_scaffold_298:374076-421911@INTRON_9,
scaffold_149:1179243-1189850	scaffold_149:1187643-1187743	101	35.8	364	evi5l_NM_001127128_+_scaffold_149:1167608-1198118@INTRON_11,
scaffold_26:3167773-3737968	scaffold_26:3539023-3539123	101	37.2	392	c1qtnf4_NM_001011345_-_scaffold_26:2470905-3738113@INTRON_3,
scaffold_429:295949-325649	scaffold_429:317249-317349	101	33.4	408	taf11_NM_001127413_+_scaffold_429:295852-390708@INTRON_1,
scaffold_1336:17975-30126	scaffold_1336:23025-23125	101	32.1	419	utp6_NM_001016855_+_scaffold_1336:6641-30692@INTRON_14,
scaffold_448:561248-908490	scaffold_448:880748-880848	101	33.5	431	cdkn2d_NM_001079371_+_scaffold_448:537564-908837@INTRON_7,
scaffold_534:585847-591518	scaffold_534:587047-587147	101	33.7	434	slc7a6_NM_001017197_-_scaffold_534:552467-595455@INTRON_9,
scaffold_414:508659-517219	scaffold_414:512859-512959	101	33.6	434	mib2_NM_001123444_+_scaffold_414:454095-523005@INTRON_13,
scaffold_424:593059-645299	scaffold_424:606159-606259	101	33.6	434	slc10a7_NM_001004977_+_scaffold_424:559161-675367@INTRON_4,
scaffold_579:263368-274056	scaffold_579:267568-267668	101	33.6	434	homer1_NM_001113132_+_scaffold_579:235660-277965@INTRON_5,
scaffold_213:1482043-1489167	scaffold_213:1482593-1482693	101	33.8	435	lrrc16a_NM_001127140_+_scaffold_213:1393364-1497627@INTRON_16,
scaffold_95:2187255-2290652	scaffold_95:2213255-2213355	101	33.8	436	tmem132d_NM_001113104_+_scaffold_95:2100100-2543069@INTRON_3,
scaffold_120:1104884-1224640	scaffold_120:1123534-1123634	101	33.8	436	cdh13_NM_001103078_+_scaffold_120:1104798-1600265@INTRON_1,
scaffold_74:2728215-2738331	scaffold_74:2734315-2734415	101	33.8	439	hnrpll_NM_001127432_+_scaffold_74:2728043-2765631@INTRON_1,
scaffold_186:885898-1268142	scaffold_186:1159448-1159548	101	33.4	439	LOC549932_NM_001017178_-_scaffold_186:804103-1268179@INTRON_3,
scaffold_409:311446-320153	scaffold_409:319046-319146	101	33.3	439	pld3_NM_001011023_-_scaffold_409:307611-326345@INTRON_6,
scaffold_34:3556578-3918839	scaffold_34:3673378-3673478	101	33.2	470	sirt4_NM_001045628_-_scaffold_34:2890969-3918895@INTRON_6,
scaffold_106:1309953-1679816	scaffold_106:1599453-1599553	101	31	474	slc39a3_NM_001102697_-_scaffold_106:83848-2455684@INTRON_9,
scaffold_729:57478-368440	scaffold_729:135778-135878	101	30.3	478	rab11fip4_NM_001102700_+_scaffold_729:15260-369371@INTRON_3,
scaffold_962:150847-172957	scaffold_962:161947-162047	101	32.6	482	slc26a9_NM_001102740_+_scaffold_962:150749-206133@INTRON_1,
scaffold_19:2806310-2855805	scaffold_19:2832360-2832460	101	32.7	483	sirt4_NM_001045628_-_scaffold_19:2806221-3055736@INTRON_1,
scaffold_244:1018688-1086439	scaffold_244:1055388-1055488	101	32.7	483	ccar1_NM_001142204_+_scaffold_244:1002975-1098742@INTRON_11,
scaffold_502:681043-709567	scaffold_502:691243-691343	101	32.7	483	rassf4_NM_001100272_-_scaffold_502:657142-749539@INTRON_8,
scaffold_343:158368-181270	scaffold_343:165718-165818	101	32.4	483	fzr1_NM_001126529_-_scaffold_343:89124-181396@INTRON_11,
scaffold_34:4086852-4132362	scaffold_34:4124002-4124102	101	30.5	483	rftn1_NM_001113084_-_scaffold_34:3959959-4153862@INTRON_7,
scaffold_18:4050443-4064148	scaffold_18:4063093-4063193	101	32.3	484	phtf1_NM_001123489_-_scaffold_18:4025544-4070588@INTRON_13,
scaffold_16:1958218-2300589	scaffold_16:2227318-2227418	101	31.6	484	ypel2_NM_001102689_+_scaffold_16:1547739-2300995@INTRON_4,

## Sheet: Stage 8 Upstream
Upstream Region	Cluster Region	Cluster Length (nt)	Mean Cluster Density	Number of clusters in genome	Gene Annotation (RefSeq)
scaffold_1831:27342-32342	scaffold_1831:28992-29142	151	38.1	0	dmbt1_NM_001142217_-_scaffold_1831:22450-27342@UPSTREAM,
scaffold_2:6369036-6374036	scaffold_2:6370286-6370436	151	33.4	0	phf10_NM_001030472_-_scaffold_2:6342312-6369036@UPSTREAM,
scaffold_49:2246050-2251050	scaffold_49:2249400-2249550	151	70.9	1	psmc1_NM_001045689_+_scaffold_49:2251050-2260216@UPSTREAM,
scaffold_107:91430-96430	scaffold_107:93880-94030	151	63.8	1	sgcb_NM_001142012_-_scaffold_107:68305-91430@UPSTREAM,
scaffold_950:181510-186510	scaffold_950:185310-186260	951	63.6	1	ctr9_NM_001005076_-_scaffold_950:165206-181510@UPSTREAM,
scaffold_328:300999-305999	scaffold_328:302799-302949	151	63.3	1	mep1a_NM_001015767_-_scaffold_328:279657-300999@UPSTREAM,
scaffold_55:209250-214250	scaffold_55:210150-210300	151	60.1	1	rnf7_NM_001114261_-_scaffold_55:205134-209250@UPSTREAM,
scaffold_10:3569605-3574605	scaffold_10:3573405-3573555	151	57.6	1	rlim_NM_001016091_+_scaffold_10:3574605-3586219@UPSTREAM,
scaffold_546:622185-627185	scaffold_546:622935-623185	251	57.1	1	hdac3_NM_001016883_-_scaffold_546:604752-622185@UPSTREAM,
scaffold_49:2248884-2253884	scaffold_49:2249384-2249584	201	56.9	1	mrps10_NM_001016991_-_scaffold_49:2242003-2248884@UPSTREAM,
scaffold_290:1199290-1204290	scaffold_290:1201490-1201740	251	52.5	1	t2r9_NM_001172001_-_scaffold_290:1198390-1199290@UPSTREAM,
scaffold_550:481977-486977	scaffold_550:486377-486527	151	51.8	1	rpp30_NM_001016584_-_scaffold_550:457229-481977@UPSTREAM,
scaffold_536:148054-153054	scaffold_536:150904-151054	151	51.1	1	blvra_NM_001006895_+_scaffold_536:153054-160867@UPSTREAM,
scaffold_274:1191503-1196503	scaffold_274:1193803-1194053	251	51	1	serinc1_NM_001011399_-_scaffold_274:1180633-1191503@UPSTREAM,
scaffold_154:1490811-1495811	scaffold_154:1491261-1491461	201	50	1	hsd17b10_NM_001016511_-_scaffold_154:1487319-1490811@UPSTREAM,
scaffold_123:682036-687036	scaffold_123:682786-682886	101	49.5	1	grwd1_NM_203937_-_scaffold_123:676441-682036@UPSTREAM,
scaffold_2:1388272-1393272	scaffold_2:1388822-1388922	101	49.2	1	rnf216_NM_001016834_-_scaffold_2:1275208-1388272@UPSTREAM,
scaffold_950:179408-184408	scaffold_950:180058-180508	451	49.1	1	ctr9_NM_001005076_-_scaffold_950:179271-179408@UPSTREAM,
scaffold_76:2210151-2215151	scaffold_76:2214101-2214201	101	48.8	1	LOC100135092_NM_001113831_+_scaffold_76:2215151-2259554@UPSTREAM,
scaffold_415:867856-872856	scaffold_415:871506-871756	251	48.8	1	syt4_NM_001171514_-_scaffold_415:512204-867856@UPSTREAM,
scaffold_4346:2984-7984	scaffold_4346:6734-6934	201	46.5	1	LOC100145508_NM_001126952_+_scaffold_4346:7984-8765@UPSTREAM,
scaffold_31:1314581-1319581	scaffold_31:1315931-1316081	151	45.1	1	mospd1_NM_001015761_-_scaffold_31:1291301-1314581@UPSTREAM,
scaffold_190:1103642-1108642	scaffold_190:1103992-1104242	251	45	1	LOC550107_NM_001017353_-_scaffold_190:1097528-1103642@UPSTREAM,
scaffold_598:136837-141837	scaffold_598:139987-140137	151	44.7	1	tmx2_NM_001005010_-_scaffold_598:89833-136837@UPSTREAM,
scaffold_4346:2984-7984	scaffold_4346:6634-6734	101	44.3	1	LOC100145508_NM_001126952_+_scaffold_4346:7984-8765@UPSTREAM,
scaffold_75:1249420-1254420	scaffold_75:1251920-1252120	201	43.7	1	tspan14_NM_001007870_-_scaffold_75:1224623-1249420@UPSTREAM,
scaffold_267:1322191-1327191	scaffold_267:1324391-1324541	151	43.2	1	slc13a2_NM_001008097_+_scaffold_267:1327191-1351788@UPSTREAM,
scaffold_90:2039152-2044152	scaffold_90:2041702-2041902	201	42.9	1	ing2_NM_001017044_+_scaffold_90:2044152-2046784@UPSTREAM,
scaffold_229:110683-115683	scaffold_229:114733-114933	201	42.9	1	adh6_NM_001011423_+_scaffold_229:115683-136134@UPSTREAM,
scaffold_1015:101623-106623	scaffold_1015:104623-104773	151	42.3	1	limd1_NM_001016606_-_scaffold_1015:85750-101623@UPSTREAM,
scaffold_429:835807-840807	scaffold_429:837207-837457	251	41.7	1	LOC100037835_NM_001114850_-_scaffold_429:832402-835807@UPSTREAM,
scaffold_106:2010336-2015336	scaffold_106:2011236-2011386	151	41.6	1	gpn2_NM_001030474_-_scaffold_106:2007598-2010336@UPSTREAM,
scaffold_923:243710-248710	scaffold_923:245810-245910	101	41.6	1	crk_NM_001006107_-_scaffold_923:230370-243710@UPSTREAM,
scaffold_742:116279-121279	scaffold_742:118729-118929	201	41.5	1	tmem5_NM_001126976_+_scaffold_742:121279-128566@UPSTREAM,
scaffold_332:677626-682626	scaffold_332:681376-681526	151	41.3	1	ankrd9_NM_001102746_-_scaffold_332:673828-677626@UPSTREAM,
scaffold_264:719483-724483	scaffold_264:722783-722933	151	40.4	1	LOC100124851_NM_001102813_+_scaffold_264:724483-731938@UPSTREAM,
scaffold_414:739003-744003	scaffold_414:743553-743753	201	40.3	1	nadk.1_NM_001004896_-_scaffold_414:698065-739003@UPSTREAM,
scaffold_591:482482-487482	scaffold_591:486682-486882	201	40.2	1	aip_NM_001102749_-_scaffold_591:412964-482482@UPSTREAM,
scaffold_37:507387-512387	scaffold_37:508087-508187	101	40	1	egln3_NM_001127012_+_scaffold_37:512387-519055@UPSTREAM,
scaffold_392:94274-99274	scaffold_392:96024-96274	251	39.7	1	enam_NM_001145743_+_scaffold_392:99274-115320@UPSTREAM,
scaffold_811:295784-300784	scaffold_811:299534-299684	151	39.7	1	LOC100379536_NM_001173439_+_scaffold_811:300784-306760@UPSTREAM,
scaffold_75:1249420-1254420	scaffold_75:1252220-1252370	151	39.5	1	tspan14_NM_001007870_-_scaffold_75:1224623-1249420@UPSTREAM,
scaffold_693:253466-258466	scaffold_693:254016-254166	151	39.1	1	ptpn3_NM_001079462_+_scaffold_693:258466-490908@UPSTREAM,
scaffold_39:1399473-1404473	scaffold_39:1401873-1402023	151	38.9	1	apoa4_NM_001008098_+_scaffold_39:1404473-1407228@UPSTREAM,
scaffold_33:2334431-2339431	scaffold_33:2337381-2337581	201	38.7	1	rbm22_NM_203777_+_scaffold_33:2339431-2351156@UPSTREAM,
scaffold_769:83286-88286	scaffold_769:86586-86786	201	38.7	1	wdr67_NM_001005061_+_scaffold_769:88286-108513@UPSTREAM,
scaffold_229:110683-115683	scaffold_229:113833-113933	101	38.5	1	adh6_NM_001011423_+_scaffold_229:115683-136134@UPSTREAM,
scaffold_164:844421-849421	scaffold_164:845421-845621	201	38.4	1	atp5j_NM_001017042_-_scaffold_164:838752-844421@UPSTREAM,
scaffold_409:349267-354267	scaffold_409:353267-353417	151	37.9	1	c19orf47_NM_001005016_+_scaffold_409:354267-363935@UPSTREAM,
scaffold_170:1963806-1968806	scaffold_170:1965606-1965706	101	37.7	1	c19orf40_NM_001016122_-_scaffold_170:1960110-1963806@UPSTREAM,
scaffold_396:246937-251937	scaffold_396:246937-247037	101	37.7	1	hla-drb1_NM_001045794_+_scaffold_396:251937-305972@UPSTREAM,
scaffold_396:246936-251936	scaffold_396:246936-247036	101	37.7	1	LOC100145090_NM_001126609_+_scaffold_396:251936-305975@UPSTREAM,
scaffold_201:419758-424758	scaffold_201:422508-422658	151	37.5	1	ptp4a1_NM_001008022_+_scaffold_201:424758-430299@UPSTREAM,
scaffold_23:3503979-3508979	scaffold_23:3506179-3506279	101	37.4	1	ube2g1_NM_203720_-_scaffold_23:3472492-3503979@UPSTREAM,
scaffold_332:677626-682626	scaffold_332:681126-681226	101	37.3	1	ankrd9_NM_001102746_-_scaffold_332:673828-677626@UPSTREAM,
scaffold_429:835807-840807	scaffold_429:838007-838207	201	37.2	1	LOC100037835_NM_001114850_-_scaffold_429:832402-835807@UPSTREAM,
scaffold_218:1310991-1315991	scaffold_218:1312141-1312241	101	36.5	1	sumo3_NM_001004853_+_scaffold_218:1315991-1323056@UPSTREAM,
scaffold_414:739003-744003	scaffold_414:743303-743503	201	36.3	1	nadk.1_NM_001004896_-_scaffold_414:698065-739003@UPSTREAM,
scaffold_25:1969342-1974342	scaffold_25:1971992-1972092	101	36.1	1	ppm1b_NM_001008029_-_scaffold_25:1947196-1969342@UPSTREAM,
scaffold_396:246924-251924	scaffold_396:246924-247024	101	36	1	LOC100145508_NM_001126952_+_scaffold_396:251924-306229@UPSTREAM,
scaffold_889:98111-103111	scaffold_889:102211-102311	101	35.7	1	ftsj3_NM_001078960_+_scaffold_889:103111-125828@UPSTREAM,
scaffold_470:132490-137490	scaffold_470:134840-135090	251	35.3	1	fzd3_NM_001129910_-_scaffold_470:85326-132490@UPSTREAM,
scaffold_177:1841747-1846747	scaffold_177:1843797-1843897	101	34.9	1	zmat2_NM_001005119_+_scaffold_177:1846747-1862469@UPSTREAM,
scaffold_274:1191503-1196503	scaffold_274:1192903-1193003	101	34.7	1	serinc1_NM_001011399_-_scaffold_274:1180633-1191503@UPSTREAM,
scaffold_154:1490811-1495811	scaffold_154:1491061-1491211	151	34.6	1	hsd17b10_NM_001016511_-_scaffold_154:1487319-1490811@UPSTREAM,
scaffold_33:4089194-4094194	scaffold_33:4090694-4090844	151	34.3	1	rnf144b_NM_001113670_+_scaffold_33:4094194-4131895@UPSTREAM,
scaffold_74:206355-211355	scaffold_74:210555-210705	151	34.3	1	acat2_NM_203634_+_scaffold_74:211355-225018@UPSTREAM,
scaffold_253:1164278-1169278	scaffold_253:1164928-1165128	201	34.3	1	nipa2_NM_001011172_-_scaffold_253:1152903-1164278@UPSTREAM,
scaffold_310:258530-263530	scaffold_310:261280-261380	101	34.3	1	ntan1_NM_001126824_-_scaffold_310:246372-258530@UPSTREAM,
scaffold_699:142819-147819	scaffold_699:145769-145919	151	34.3	1	lgi2_NM_001102924_+_scaffold_699:147819-169791@UPSTREAM,
scaffold_434:760350-765350	scaffold_434:763100-763200	101	34.1	1	reps1_NM_001045730_-_scaffold_434:505856-760350@UPSTREAM,
scaffold_481:538873-543873	scaffold_481:541623-541773	151	33.9	1	ccdc97_NM_001016433_+_scaffold_481:543873-547664@UPSTREAM,
scaffold_380:951140-956140	scaffold_380:953440-953590	151	33.8	1	rap1b_NM_001008194_-_scaffold_380:917465-951140@UPSTREAM,
scaffold_91:2473108-2478108	scaffold_91:2476208-2476308	101	33.7	1	t2r44_NM_001172028_-_scaffold_91:2472154-2473108@UPSTREAM,
scaffold_739:68062-73062	scaffold_739:68162-68262	101	33.4	1	ptk2b_NM_001011049_+_scaffold_739:73062-142016@UPSTREAM,
scaffold_419:1011750-1016750	scaffold_419:1013250-1013350	101	33.3	1	MGC147133_NM_001079159_+_scaffold_419:1016750-1021318@UPSTREAM,
scaffold_80:1996100-2001100	scaffold_80:1998150-1998300	151	33.2	1	hmgb1_NM_203895_+_scaffold_80:2001100-2009791@UPSTREAM,
scaffold_1136:113940-118940	scaffold_1136:116790-116940	151	33.2	1	rbpms_NM_001171852_+_scaffold_1136:118940-119296@UPSTREAM,
scaffold_218:1576757-1581757	scaffold_218:1578207-1578307	101	32.9	1	adarb1_NM_001102720_+_scaffold_218:1581757-1630491@UPSTREAM,
scaffold_278:684752-689752	scaffold_278:685802-685952	151	32.9	1	tnip1_NM_001079235_-_scaffold_278:634613-684752@UPSTREAM,
scaffold_143:1494412-1499412	scaffold_143:1497262-1497362	101	32.4	1	pcna_NM_001007920_+_scaffold_143:1499412-1503554@UPSTREAM,
scaffold_179:117583-122583	scaffold_179:121083-121233	151	32.4	1	ppa2_NM_001011461_+_scaffold_179:122583-165813@UPSTREAM,
scaffold_356:1025813-1030813	scaffold_356:1028613-1028763	151	32.4	1	u2af2_NM_001001217_-_scaffold_356:1015122-1025813@UPSTREAM,
scaffold_2:1388272-1393272	scaffold_2:1389822-1389972	151	32.1	1	rnf216_NM_001016834_-_scaffold_2:1275208-1388272@UPSTREAM,
scaffold_56:2660670-2665670	scaffold_56:2663320-2663470	151	32.1	1	mpp6_NM_001017060_-_scaffold_56:2629560-2660670@UPSTREAM,
scaffold_356:1025768-1030768	scaffold_356:1028618-1028768	151	31.9	1	u2af2_NM_001016998_-_scaffold_356:1015366-1025768@UPSTREAM,
scaffold_647:315141-320141	scaffold_647:319141-319241	101	31.8	1	tdgf1_NM_001085360_-_scaffold_647:302129-315141@UPSTREAM,
scaffold_66:2195956-2200956	scaffold_66:2198456-2198556	101	31.5	1	pabpn1l_NM_001016352_-_scaffold_66:2189363-2195956@UPSTREAM,
scaffold_91:2473108-2478108	scaffold_91:2475508-2475608	101	31.5	1	t2r44_NM_001172028_-_scaffold_91:2472154-2473108@UPSTREAM,
scaffold_89:789721-794721	scaffold_89:792821-792971	151	31.2	1	casp6_NM_001011068_+_scaffold_89:794721-808416@UPSTREAM,
scaffold_106:2037216-2042216	scaffold_106:2037916-2038016	101	31.1	1	gpatch3_NM_001126999_-_scaffold_106:2022823-2037216@UPSTREAM,
scaffold_1379:15708-20708	scaffold_1379:19308-19408	101	31	1	heca_NM_001097357_-_scaffold_1379:15280-15708@UPSTREAM,
scaffold_295:1322767-1327767	scaffold_295:1324317-1324417	101	30.9	1	csk_NM_001142143_-_scaffold_295:1278965-1322767@UPSTREAM,
scaffold_1299:44783-49783	scaffold_1299:46483-46583	101	30.9	1	nup43_NM_001016144_+_scaffold_1299:49783-78350@UPSTREAM,
scaffold_5:5754292-5759292	scaffold_5:5756942-5757042	101	30.8	1	dis3l2_NM_001079336_+_scaffold_5:5759292-6164148@UPSTREAM,
scaffold_115:10852-15852	scaffold_115:14902-15002	101	30.8	1	sfrs18_NM_001083345_+_scaffold_115:15852-30586@UPSTREAM,
scaffold_733:217199-222199	scaffold_733:219849-219949	101	30.6	1	hbg2_NM_001004899_+_scaffold_733:222199-223401@UPSTREAM,
scaffold_481:538873-543873	scaffold_481:541523-541623	101	30.5	1	ccdc97_NM_001016433_+_scaffold_481:543873-547664@UPSTREAM,
scaffold_332:677626-682626	scaffold_332:681226-681326	101	30.3	1	ankrd9_NM_001102746_-_scaffold_332:673828-677626@UPSTREAM,
scaffold_357:1005993-1010993	scaffold_357:1007193-1007293	101	30.2	1	hba-l5_NM_001016009_-_scaffold_357:1003795-1005993@UPSTREAM,
scaffold_543:729648-734648	scaffold_543:733298-733398	101	30.2	1	gsg1l_NM_001102982_+_scaffold_543:734648-742445@UPSTREAM,
scaffold_491:22692-27692	scaffold_491:24642-24792	151	29.7	1	ppp2r5e_NM_203922_+_scaffold_491:27692-75543@UPSTREAM,
scaffold_70:153494-158494	scaffold_70:156644-156794	151	29.1	1	rwdd3_NM_001017275_+_scaffold_70:158494-168490@UPSTREAM,
scaffold_47:1587338-1592338	scaffold_47:1591138-1591288	151	26.9	1	prtfdc1_NM_001102892_+_scaffold_47:1592338-1612561@UPSTREAM,
scaffold_58:816306-821306	scaffold_58:817156-817306	151	26.7	1	fam172a_NM_001004971_-_scaffold_58:563728-816306@UPSTREAM,
scaffold_586:613544-618544	scaffold_586:615694-615844	151	25.6	1	wdr24_NM_001142066_-_scaffold_586:594516-613544@UPSTREAM,
scaffold_742:308447-313447	scaffold_742:313197-313347	151	25.5	1	rpl18a_NM_001016690_-_scaffold_742:301684-308447@UPSTREAM,
scaffold_742:310446-315446	scaffold_742:313196-313346	151	25.4	1	nxt2_NM_001126661_+_scaffold_742:315446-319562@UPSTREAM,
scaffold_389:54591-59591	scaffold_389:56441-56591	151	25.1	1	paf1_NM_204017_-_scaffold_389:42168-54591@UPSTREAM,
scaffold_389:55241-60241	scaffold_389:56441-56591	151	25.1	1	med29_NM_001079404_+_scaffold_389:60241-63424@UPSTREAM,
scaffold_396:246924-251924	scaffold_396:247924-248074	151	24.9	1	LOC100145508_NM_001126952_+_scaffold_396:251924-306229@UPSTREAM,
scaffold_1136:113940-118940	scaffold_1136:117190-117340	151	24.7	1	rbpms_NM_001171852_+_scaffold_1136:118940-119296@UPSTREAM,
scaffold_106:2010336-2015336	scaffold_106:2011486-2011636	151	23.5	1	gpn2_NM_001030474_-_scaffold_106:2007598-2010336@UPSTREAM,
scaffold_417:663389-668389	scaffold_417:668089-668239	151	21.7	1	scamp4_NM_001079024_-_scaffold_417:655334-663389@UPSTREAM,
scaffold_923:207957-212957	scaffold_923:209957-210107	151	21.6	1	ywhae_NM_001008155_-_scaffold_923:185716-207957@UPSTREAM,
scaffold_74:206355-211355	scaffold_74:210355-210505	151	56	2	acat2_NM_203634_+_scaffold_74:211355-225018@UPSTREAM,
scaffold_243:1371156-1376156	scaffold_243:1375156-1375306	151	42.2	2	cdc23_NM_001016759_+_scaffold_243:1376156-1386510@UPSTREAM,
scaffold_396:246937-251937	scaffold_396:247937-248037	101	36.7	2	hla-drb1_NM_001045794_+_scaffold_396:251937-305972@UPSTREAM,
scaffold_396:246936-251936	scaffold_396:247936-248036	101	36.6	2	LOC100145090_NM_001126609_+_scaffold_396:251936-305975@UPSTREAM,
scaffold_70:3225764-3230764	scaffold_70:3230014-3230114	101	31.2	2	ciapin1_NM_001016593_-_scaffold_70:3222997-3225764@UPSTREAM,
scaffold_1:495412-500412	scaffold_1:499112-499262	151	28.4	2	dmap1_NM_001005440_-_scaffold_1:463007-495412@UPSTREAM,
scaffold_244:997975-1002975	scaffold_244:998425-998575	151	28	2	ccar1_NM_001142204_+_scaffold_244:1002975-1098742@UPSTREAM,
scaffold_950:179408-184408	scaffold_950:180558-180658	101	46.1	3	ctr9_NM_001005076_-_scaffold_950:179271-179408@UPSTREAM,
scaffold_1219:12015-17015	scaffold_1219:16065-16215	151	37.7	3	rnf168_NM_001126497_+_scaffold_1219:17015-26994@UPSTREAM,
scaffold_938:239579-244579	scaffold_938:244229-244329	101	33.8	3	socs6_NM_001102770_-_scaffold_938:227138-239579@UPSTREAM,
scaffold_1379:58198-63198	scaffold_1379:61148-61248	101	33.1	3	c6orf115_NM_001171618_-_scaffold_1379:31425-58198@UPSTREAM,
scaffold_37:507387-512387	scaffold_37:509637-509737	101	31.4	3	egln3_NM_001127012_+_scaffold_37:512387-519055@UPSTREAM,
scaffold_512:683773-688773	scaffold_512:687423-687523	101	30.7	3	tmem167b_NM_001016348_+_scaffold_512:688773-697204@UPSTREAM,
scaffold_223:669593-674593	scaffold_223:673693-673843	151	29.5	3	c1orf212_NM_001016019_+_scaffold_223:674593-678708@UPSTREAM,
scaffold_283:1461845-1466845	scaffold_283:1465345-1465445	101	62.2	4	tox3_NM_001128012_+_scaffold_283:1466845-1467150@UPSTREAM,
scaffold_117:854724-859724	scaffold_117:856274-856374	101	48.7	4	nono_NM_205829_+_scaffold_117:859724-869366@UPSTREAM,
scaffold_15:4222779-4227779	scaffold_15:4226079-4226229	151	41.9	4	pde1a_NM_001102974_+_scaffold_15:4227779-4386231@UPSTREAM,
scaffold_18:2595542-2600542	scaffold_18:2599842-2599942	101	31.4	4	ppm1j_NM_001005797_-_scaffold_18:2567912-2595542@UPSTREAM,
scaffold_1203:45265-50265	scaffold_1203:47165-47265	101	31.4	4	LOC100144983_NM_001126549_-_scaffold_1203:45031-45265@UPSTREAM,
scaffold_33:2334431-2339431	scaffold_33:2336681-2336831	151	26	5	rbm22_NM_203777_+_scaffold_33:2339431-2351156@UPSTREAM,
scaffold_1219:12015-17015	scaffold_1219:15865-16065	201	33.6	6	rnf168_NM_001126497_+_scaffold_1219:17015-26994@UPSTREAM,
scaffold_274:1191503-1196503	scaffold_274:1193453-1193603	151	26.5	6	serinc1_NM_001011399_-_scaffold_274:1180633-1191503@UPSTREAM,
scaffold_89:1047783-1052783	scaffold_89:1052133-1052233	101	40.2	7	larp7_NM_001045703_+_scaffold_89:1052783-1076917@UPSTREAM,
scaffold_379:465655-470655	scaffold_379:469355-469505	151	31.4	7	foxh1_NM_001017084_+_scaffold_379:470655-482950@UPSTREAM,
scaffold_1203:45265-50265	scaffold_1203:46115-46215	101	30.4	7	LOC100144983_NM_001126549_-_scaffold_1203:45031-45265@UPSTREAM,
scaffold_222:984761-989761	scaffold_222:984861-985011	151	33.2	8	slc25a29_NM_001102721_+_scaffold_222:989761-1007781@UPSTREAM,
scaffold_1379:58198-63198	scaffold_1379:60048-60148	101	32.5	8	c6orf115_NM_001171618_-_scaffold_1379:31425-58198@UPSTREAM,
scaffold_21:2828739-2833739	scaffold_21:2831439-2831539	101	32.2	8	eif3b_NM_001016724_-_scaffold_21:2813838-2828739@UPSTREAM,
scaffold_538:260893-265893	scaffold_538:264143-264243	101	30.9	8	gnl2_NM_001001243_+_scaffold_538:265893-302396@UPSTREAM,
scaffold_1299:44783-49783	scaffold_1299:45533-45683	151	26.7	8	nup43_NM_001016144_+_scaffold_1299:49783-78350@UPSTREAM,
scaffold_463:792094-797094	scaffold_463:792244-792444	201	31.5	10	mef2a_NM_001142033_-_scaffold_463:771110-792094@UPSTREAM,
scaffold_24:4368816-4373816	scaffold_24:4370916-4371016	101	30.1	10	hspa9_NM_001001229_+_scaffold_24:4373816-4414020@UPSTREAM,
scaffold_512:683773-688773	scaffold_512:686673-686823	151	33.3	11	tmem167b_NM_001016348_+_scaffold_512:688773-697204@UPSTREAM,
scaffold_742:116279-121279	scaffold_742:119229-119329	101	36.1	12	tmem5_NM_001126976_+_scaffold_742:121279-128566@UPSTREAM,
scaffold_305:884643-889643	scaffold_305:887543-887693	151	29.3	12	chmp2a_NM_001005008_-_scaffold_305:879550-884643@UPSTREAM,
scaffold_938:239579-244579	scaffold_938:243229-243379	151	36.5	13	socs6_NM_001102770_-_scaffold_938:227138-239579@UPSTREAM,
scaffold_21:2828739-2833739	scaffold_21:2831939-2832089	151	29.7	13	eif3b_NM_001016724_-_scaffold_21:2813838-2828739@UPSTREAM,
scaffold_15:4222779-4227779	scaffold_15:4226229-4226429	201	39.6	14	pde1a_NM_001102974_+_scaffold_15:4227779-4386231@UPSTREAM,
scaffold_49:3247920-3252920	scaffold_49:3252370-3252470	101	37.1	17	LOC100037835_NM_001114850_-_scaffold_49:3245757-3247920@UPSTREAM,
scaffold_512:683773-688773	scaffold_512:686923-687023	101	35.4	18	tmem167b_NM_001016348_+_scaffold_512:688773-697204@UPSTREAM,
scaffold_742:363467-368467	scaffold_742:366067-366167	101	38.4	19	xpot_NM_001142243_-_scaffold_742:336366-363467@UPSTREAM,
scaffold_1601:20700-25700	scaffold_1601:24150-24300	151	36.2	19	c1orf89_NM_001016685_-_scaffold_1601:17715-20700@UPSTREAM,
scaffold_136:932604-937604	scaffold_136:936154-936254	101	35.7	19	LOC100124941_NM_001102881_-_scaffold_136:922627-932604@UPSTREAM,
scaffold_733:303258-308258	scaffold_733:306508-306658	151	49.6	21	hbe1_NM_001016495_+_scaffold_733:308258-323428@UPSTREAM,
scaffold_466:62098-67098	scaffold_466:65998-66098	101	35.9	21	luc7l_NM_001005458_-_scaffold_466:19145-62098@UPSTREAM,
scaffold_71:585626-590626	scaffold_71:586776-586976	201	37.3	22	rab9a_NM_001079169_-_scaffold_71:573962-585626@UPSTREAM,
scaffold_372:143049-148049	scaffold_372:146199-146299	101	36.7	22	chpf2_NM_001142158_+_scaffold_372:148049-148134@UPSTREAM,
scaffold_280:945613-950613	scaffold_280:947413-947513	101	30.3	22	fgfrl1_NM_001011189_+_scaffold_280:950613-1067293@UPSTREAM,
scaffold_21:2828739-2833739	scaffold_21:2833439-2833539	101	34.5	23	eif3b_NM_001016724_-_scaffold_21:2813838-2828739@UPSTREAM,
scaffold_392:94274-99274	scaffold_392:95824-95924	101	35.6	24	enam_NM_001145743_+_scaffold_392:99274-115320@UPSTREAM,
scaffold_346:672580-677580	scaffold_346:677430-677580	151	29.2	27	dynlrb2_NM_001016395_-_scaffold_346:669019-672580@UPSTREAM,
scaffold_113:286876-291876	scaffold_113:290626-290776	151	26.1	27	gtf2h2_NM_001011081_+_scaffold_113:291876-304649@UPSTREAM,
scaffold_936:64493-69493	scaffold_936:66193-66293	101	31.1	31	dpp9_NM_001122790_+_scaffold_936:69493-89956@UPSTREAM,
scaffold_48:636849-641849	scaffold_48:640899-640999	101	33.7	37	pard6b_NM_001128639_-_scaffold_48:612998-636849@UPSTREAM,
scaffold_305:884643-889643	scaffold_305:887293-887443	151	34.2	38	chmp2a_NM_001005008_-_scaffold_305:879550-884643@UPSTREAM,
scaffold_410:311840-316840	scaffold_410:315390-315540	151	32	38	mex3d_NM_001123472_-_scaffold_410:309520-311840@UPSTREAM,
scaffold_941:211916-216916	scaffold_941:213016-213116	101	38.7	39	LOC733521_NM_001044447_-_scaffold_941:207016-211916@UPSTREAM,
scaffold_419:1011750-1016750	scaffold_419:1013500-1013650	151	33	39	MGC147133_NM_001079159_+_scaffold_419:1016750-1021318@UPSTREAM,
scaffold_142:887535-892535	scaffold_142:891635-891735	101	30.4	41	prkrip1_NM_001017225_-_scaffold_142:878818-887535@UPSTREAM,
scaffold_18:2546027-2551027	scaffold_18:2550827-2550927	101	33.5	46	rhoc_NM_001016569_-_scaffold_18:2512029-2546027@UPSTREAM,
scaffold_179:695987-700987	scaffold_179:700837-700987	151	23.1	52	dnajb12_NM_001015991_-_scaffold_179:671977-695987@UPSTREAM,
scaffold_18523:2171-7171	scaffold_18523:2671-2821	151	43.7	53	cfh_NM_203887_-_scaffold_18523:1102-2171@UPSTREAM,
scaffold_267:714974-719974	scaffold_267:716224-716324	101	35.2	53	dph1_NM_001142155_+_scaffold_267:719974-847113@UPSTREAM,
scaffold_248:1478263-1483263	scaffold_248:1480563-1480663	101	37.3	55	chac2_NM_001017137_-_scaffold_248:1468658-1478263@UPSTREAM,
scaffold_24:4368816-4373816	scaffold_24:4371166-4371266	101	37.9	65	hspa9_NM_001001229_+_scaffold_24:4373816-4414020@UPSTREAM,
scaffold_849:314211-319211	scaffold_849:317361-317461	101	39.7	76	znf326_NM_001016086_-_scaffold_849:298360-314211@UPSTREAM,
scaffold_742:363467-368467	scaffold_742:365867-365967	101	36.3	76	xpot_NM_001142243_-_scaffold_742:336366-363467@UPSTREAM,
scaffold_143:1485441-1490441	scaffold_143:1486941-1487041	101	34.3	84	cds2_NM_001126503_-_scaffold_143:1465357-1485441@UPSTREAM,
scaffold_425:878701-883701	scaffold_425:882301-882401	101	35.7	90	ccdc127_NM_001016568_+_scaffold_425:883701-891078@UPSTREAM,
scaffold_35:1181645-1186645	scaffold_35:1182545-1182645	101	31.6	99	cxorf38_NM_001127142_+_scaffold_35:1186645-1193458@UPSTREAM,
scaffold_103:2781602-2786602	scaffold_103:2785852-2785952	101	36.6	101	chkb_NM_001126676_-_scaffold_103:2769288-2781602@UPSTREAM,
scaffold_1393:76718-81718	scaffold_1393:77568-77668	101	36.6	115	uxs1_NM_001006848_-_scaffold_1393:56287-76718@UPSTREAM,
scaffold_410:311840-316840	scaffold_410:315840-315940	101	33.5	116	mex3d_NM_001123472_-_scaffold_410:309520-311840@UPSTREAM,
scaffold_539:727459-732459	scaffold_539:728609-728709	101	33.1	116	dad1_NM_001016940_-_scaffold_539:723052-727459@UPSTREAM,
scaffold_24:4368816-4373816	scaffold_24:4372066-4372166	101	33.4	117	hspa9_NM_001001229_+_scaffold_24:4373816-4414020@UPSTREAM,
scaffold_69:1320345-1325345	scaffold_69:1324045-1324145	101	36.7	119	wbp2nl_NM_001113925_+_scaffold_69:1325345-1334233@UPSTREAM,
scaffold_35:1181645-1186645	scaffold_35:1182345-1182445	101	36.1	124	cxorf38_NM_001127142_+_scaffold_35:1186645-1193458@UPSTREAM,
scaffold_411:775644-780644	scaffold_411:779844-779944	101	31.6	124	zmym4_NM_001129925_-_scaffold_411:716067-775644@UPSTREAM,
scaffold_252:980969-985969	scaffold_252:981569-981669	101	31.6	126	heca_NM_001097357_+_scaffold_252:985969-1005041@UPSTREAM,
scaffold_103:2448895-2453895	scaffold_103:2450995-2451095	101	32.7	128	fbxo22_NM_001079429_-_scaffold_103:2434099-2448895@UPSTREAM,
scaffold_283:379570-384570	scaffold_283:383170-383270	101	31.7	128	cfdp1_NM_001017329_-_scaffold_283:333750-379570@UPSTREAM,
scaffold_31:1076471-1081471	scaffold_31:1078221-1078321	101	32.3	129	LOC100127779_NM_001113099_+_scaffold_31:1081471-1092049@UPSTREAM,
scaffold_2589:1-3814	scaffold_2589:101-201	101	32.3	129	kif4a_NM_001006740_+_scaffold_2589:3814-16363@UPSTREAM,
scaffold_512:746818-751818	scaffold_512:751568-751668	101	30.3	129	apobec2_NM_001006721_-_scaffold_512:732978-746818@UPSTREAM,
scaffold_1021:125814-130814	scaffold_1021:127114-127214	101	30.8	131	erlin1_NM_001016892_-_scaffold_1021:28721-125814@UPSTREAM,
scaffold_466:396827-401827	scaffold_466:398327-398477	151	33.3	138	dhrs7b_NM_001078778_+_scaffold_466:401827-424456@UPSTREAM,
scaffold_473:231856-236856	scaffold_473:234406-234506	101	32.9	138	hspc159_NM_001001900_-_scaffold_473:210490-231856@UPSTREAM,
scaffold_669:125315-130315	scaffold_669:128165-128315	151	29.9	138	znf674_NM_001045611_-_scaffold_669:122672-125315@UPSTREAM,
scaffold_274:203573-208573	scaffold_274:206073-206173	101	35.6	143	rsph3_NM_213698_-_scaffold_274:179252-203573@UPSTREAM,
scaffold_742:363467-368467	scaffold_742:366667-366767	101	30.8	143	xpot_NM_001142243_-_scaffold_742:336366-363467@UPSTREAM,
scaffold_1010:193869-198869	scaffold_1010:194619-194719	101	31.9	154	crat.1_NM_001032318_-_scaffold_1010:180304-193869@UPSTREAM,
scaffold_357:975625-980625	scaffold_357:979825-979925	101	30.7	168	LOC100216102_NM_001142084_-_scaffold_357:973764-975625@UPSTREAM,
scaffold_320:287409-292409	scaffold_320:290159-290259	101	33.6	187	c3orf23_NM_001016864_-_scaffold_320:274515-287409@UPSTREAM,
scaffold_228:1676571-1681571	scaffold_228:1677421-1677521	101	31.2	206	zfr_NM_001011177_+_scaffold_228:1681571-1712011@UPSTREAM,
scaffold_699:142819-147819	scaffold_699:145569-145669	101	36.7	257	lgi2_NM_001102924_+_scaffold_699:147819-169791@UPSTREAM,
scaffold_320:287409-292409	scaffold_320:290409-290509	101	36.4	259	c3orf23_NM_001016864_-_scaffold_320:274515-287409@UPSTREAM,
scaffold_31:1076471-1081471	scaffold_31:1078471-1078571	101	36.8	274	LOC100127779_NM_001113099_+_scaffold_31:1081471-1092049@UPSTREAM,
scaffold_586:613544-618544	scaffold_586:615994-616094	101	37.2	345	wdr24_NM_001142066_-_scaffold_586:594516-613544@UPSTREAM,
scaffold_115:10852-15852	scaffold_115:15202-15302	101	31	350	sfrs18_NM_001083345_+_scaffold_115:15852-30586@UPSTREAM,
scaffold_67:1504-6504	scaffold_67:2504-2604	101	33.7	356	mars_NM_001017000_+_scaffold_67:6504-23512@UPSTREAM,
scaffold_1336:32631-37631	scaffold_1336:33831-33931	101	33.2	358	suz12_NM_001078824_+_scaffold_1336:37631-57617@UPSTREAM,
scaffold_664:483152-488152	scaffold_664:486102-486202	101	33.4	434	dpepe_NM_001016448_-_scaffold_664:473957-483152@UPSTREAM,
scaffold_105:51508-56508	scaffold_105:54308-54408	101	33.2	470	agps_NM_001126829_+_scaffold_105:56508-180470@UPSTREAM,
scaffold_1336:32631-37631	scaffold_1336:33081-33181	101	33	478	suz12_NM_001078824_+_scaffold_1336:37631-57617@UPSTREAM,
scaffold_596:236370-241370	scaffold_596:236420-236520	101	32.6	482	e2f3_NM_001011109_+_scaffold_596:241370-251788@UPSTREAM,

## Sheet: Stage 10 Intron
Intron Region	Cluster Region	Cluster Length (nt)	Mean Cluster Density	Number of clusters in genome	Gene Annotation (RefSeq)
scaffold_1142:24572-34885	scaffold_1142:32522-33472	951	52.6	0	cables2_NM_001114489_-_scaffold_1142:24444-40556@INTRON_1,
scaffold_135:1214666-1417655	scaffold_135:1299516-1299616	101	33.9	0	chd9_NM_001045586_+_scaffold_135:1214575-1809035@INTRON_1,
scaffold_152:1345331-1349677	scaffold_152:1348781-1348881	101	31.8	0	fer_NM_001016902_-_scaffold_152:1330044-1377914@INTRON_5,
scaffold_152:1104097-1111514	scaffold_152:1110747-1110897	151	30.2	0	sirt4_NM_001045628_+_scaffold_152:1103851-1507544@INTRON_3,
scaffold_917:210144-225902	scaffold_917:219044-219444	401	72.3	1	arhgef10l_NM_001127901_-_scaffold_917:156027-248367@INTRON_19,
scaffold_535:60205-324154	scaffold_535:179405-179755	351	68.1	1	zadh2_NM_001011370_+_scaffold_535:60153-605646@INTRON_1,
scaffold_535:60205-324154	scaffold_535:179755-179955	201	61.6	1	zadh2_NM_001011370_+_scaffold_535:60153-605646@INTRON_1,
scaffold_495:651347-662635	scaffold_495:654097-654247	151	57.6	1	commd1_NM_001122721_+_scaffold_495:651153-697466@INTRON_1,
scaffold_417:559637-569966	scaffold_417:561837-561987	151	55.6	1	oaz2_NM_001113112_-_scaffold_417:550035-570180@INTRON_4,
scaffold_1142:3277-41075	scaffold_1142:32527-33427	901	55.1	1	LOC100145503_NM_001126947_+_scaffold_1142:3190-43499@INTRON_1,
scaffold_329:1010717-1025595	scaffold_329:1016617-1016767	151	54.6	1	cryl1_NM_001127026_-_scaffold_329:992921-1039446@INTRON_5,
scaffold_243:237952-243728	scaffold_243:240152-240252	101	53.9	1	gnptab_NM_001097235_+_scaffold_243:225759-269611@INTRON_5,
scaffold_529:837368-841752	scaffold_529:840268-840418	151	53.1	1	rnf126_NM_001006734_-_scaffold_529:820829-841946@INTRON_6,
scaffold_69:935963-938500	scaffold_69:936413-936563	151	52.4	1	cbx6_NM_001016617_+_scaffold_69:924572-939571@INTRON_4,
scaffold_598:137267-145003	scaffold_598:140017-140117	101	52.4	1	med19_NM_001101806_+_scaffold_598:137077-169874@INTRON_1,
scaffold_6:4127277-4149603	scaffold_6:4144877-4145027	151	52.2	1	vac14_NM_001142192_+_scaffold_6:4109725-4192899@INTRON_9,
scaffold_6:3927129-4384212	scaffold_6:4144879-4145029	151	52.2	1	slc39a3_NM_001102697_-_scaffold_6:2781856-5867994@INTRON_9,
scaffold_310:851353-860061	scaffold_310:858753-858853	101	51.8	1	cpped1_NM_001016142_-_scaffold_310:821842-860195@INTRON_3,
scaffold_32:3795084-3835438	scaffold_32:3820984-3821134	151	50.6	1	adam12_NM_001040014_+_scaffold_32:3589463-3881697@INTRON_11,
scaffold_99:1446550-1503872	scaffold_99:1487800-1487900	101	49.6	1	tsnare1_NM_001112923_+_scaffold_99:1366510-1504214@INTRON_9,
scaffold_34:2891058-3302201	scaffold_34:3068858-3068958	101	49	1	sirt4_NM_001045628_-_scaffold_34:2890969-3918895@INTRON_1,
scaffold_196:290332-394732	scaffold_196:387032-387182	151	48.8	1	grm7_NM_001113008_+_scaffold_196:289716-556761@INTRON_1,
scaffold_4:759869-777718	scaffold_4:771019-771119	101	48.3	1	st3gal3_NM_204095_-_scaffold_4:749128-873359@INTRON_3,
scaffold_2:1340889-1356905	scaffold_2:1348239-1348339	101	46.8	1	rnf216_NM_001016834_-_scaffold_2:1275208-1388272@INTRON_14,
scaffold_29:2060859-2204052	scaffold_29:2108959-2109059	101	46	1	becn1_NM_001033940_-_scaffold_29:2034824-2208501@INTRON_10,
scaffold_917:210144-225902	scaffold_917:218844-219044	201	45.1	1	arhgef10l_NM_001127901_-_scaffold_917:156027-248367@INTRON_19,
scaffold_84:1535072-1618832	scaffold_84:1596522-1596672	151	44.2	1	cdh2_NM_001127418_+_scaffold_84:1522000-1652506@INTRON_2,
scaffold_2:3744415-3754881	scaffold_2:3751115-3751215	101	43.5	1	agpat4_NM_001011265_+_scaffold_2:3718035-3759067@INTRON_5,
scaffold_246:1635683-1639029	scaffold_246:1638683-1638833	151	43.1	1	rab15_NM_001016372_+_scaffold_246:1614447-1641068@INTRON_6,
scaffold_232:1467733-1504098	scaffold_232:1496933-1497083	151	43	1	gtdc1_NM_001007983_+_scaffold_232:1425988-1565344@INTRON_4,
scaffold_248:190002-192407	scaffold_248:190852-191002	151	42.7	1	gpcpd1_NM_001142145_+_scaffold_248:162175-200072@INTRON_17,
scaffold_501:803938-816898	scaffold_501:810788-810938	151	42.3	1	mta1_NM_001011163_-_scaffold_501:781308-828748@INTRON_15,
scaffold_220:1703402-1708283	scaffold_220:1706452-1706602	151	41.8	1	prkcz_NM_001100265_-_scaffold_220:1599873-1708643@INTRON_17,
scaffold_159:1528117-1557741	scaffold_159:1536767-1536917	151	41.6	1	gnai2_NM_203919_-_scaffold_159:1512727-1558060@INTRON_7,
scaffold_750:229825-248223	scaffold_750:235825-235925	101	41.5	1	cul3_NM_001015975_-_scaffold_750:211514-248473@INTRON_15,
scaffold_483:474593-811871	scaffold_483:682993-683143	151	41.2	1	c16orf57_NM_001127143_+_scaffold_483:474387-811964@INTRON_1,
scaffold_79:1772801-2156564	scaffold_79:1953651-1953751	101	40.6	1	slc39a3_NM_001102697_+_scaffold_79:680766-2284175@INTRON_13,
scaffold_850:298675-314846	scaffold_850:301475-301625	151	40.3	1	prkar1b_NM_001079454_+_scaffold_850:294848-318660@INTRON_2,
scaffold_256:1526020-1529810	scaffold_256:1528470-1528620	151	39.3	1	sptlc1_NM_001079574_-_scaffold_256:1493908-1529878@INTRON_14,
scaffold_135:129934-137489	scaffold_135:132834-132934	101	39	1	map7d2_NM_001079229_+_scaffold_135:96695-161300@INTRON_3,
scaffold_161:1414303-1416490	scaffold_161:1416053-1416153	101	38.7	1	LOC100145274_NM_001126753_+_scaffold_161:1413911-1429014@INTRON_2,
scaffold_466:462919-517455	scaffold_466:481169-481269	101	38.6	1	tmem11_NM_001016689_-_scaffold_466:462102-517505@INTRON_1,
scaffold_383:526880-654370	scaffold_383:575080-575230	151	38.5	1	kiaa0895_NM_001114073_-_scaffold_383:120263-654575@INTRON_5,
scaffold_497:257122-308813	scaffold_497:271572-271722	151	38.5	1	c10orf54_NM_001011488_+_scaffold_497:256954-317894@INTRON_1,
scaffold_44:3276171-3380580	scaffold_44:3316821-3316921	101	37.4	1	tpra1_NM_001130334_+_scaffold_44:3253659-3384012@INTRON_11,
scaffold_1142:3277-41075	scaffold_1142:37927-38127	201	37.3	1	LOC100145503_NM_001126947_+_scaffold_1142:3190-43499@INTRON_1,
scaffold_729:57478-368440	scaffold_729:295778-295878	101	37.2	1	rab11fip4_NM_001102700_+_scaffold_729:15260-369371@INTRON_3,
scaffold_106:84779-503722	scaffold_106:138779-138879	101	37.1	1	slc39a3_NM_001102697_-_scaffold_106:83848-2455684@INTRON_4,
scaffold_1142:35178-40244	scaffold_1142:37928-38128	201	37	1	cables2_NM_001114489_-_scaffold_1142:24444-40556@INTRON_2,
scaffold_457:119502-129633	scaffold_457:122502-122602	101	36.9	1	LOC100145536_NM_001126973_+_scaffold_457:112188-134185@INTRON_3,
scaffold_714:145969-168358	scaffold_714:157219-157319	101	36.9	1	vcl_NM_001097253_-_scaffold_714:77526-187403@INTRON_19,
scaffold_37:2917615-2921758	scaffold_37:2918915-2919065	151	36.7	1	c15orf41_NM_001016489_+_scaffold_37:2851946-2999220@INTRON_8,
scaffold_86:2135901-2138466	scaffold_86:2137351-2137501	151	36.7	1	jak2_NM_001097165_-_scaffold_86:2104825-2188600@INTRON_18,
scaffold_486:672807-701335	scaffold_486:688357-688457	101	36.7	1	ralgapa2_NM_001126826_+_scaffold_486:672405-846155@INTRON_1,
scaffold_161:717069-727734	scaffold_161:722619-722719	101	36.5	1	slc48a1_NM_001015946_+_scaffold_161:716812-730688@INTRON_1,
scaffold_26:2331699-2339154	scaffold_26:2335899-2335999	101	36.3	1	ube2e2_NM_001126511_-_scaffold_26:2327849-2444852@INTRON_2,
scaffold_777:125171-136599	scaffold_777:127121-127271	151	36.2	1	kiaa1797_NM_001016255_-_scaffold_777:116299-137132@INTRON_4,
scaffold_507:246775-247788	scaffold_507:247575-247675	101	35.8	1	fam102a_NM_001097168_-_scaffold_507:238163-268567@INTRON_6,
scaffold_950:174249-181062	scaffold_950:180099-180399	301	35.8	1	ctr9_NM_001005076_-_scaffold_950:165206-181510@INTRON_19,
scaffold_496:743434-746435	scaffold_496:745734-745884	151	35.7	1	ndrg1_NM_001008145_-_scaffold_496:742610-773801@INTRON_1,
scaffold_346:445974-451450	scaffold_346:446774-446924	151	35.6	1	cenpn_NM_001011097_-_scaffold_346:443163-458035@INTRON_3,
scaffold_788:37498-55015	scaffold_788:53098-53248	151	35.6	1	hsd17b13_NM_001011240_+_scaffold_788:37261-65063@INTRON_1,
scaffold_30:4108110-4125308	scaffold_30:4115210-4115360	151	35.5	1	imp3_NM_001004848_+_scaffold_30:4088087-4126240@INTRON_3,
scaffold_143:724197-1045561	scaffold_143:874747-874847	101	35.5	1	myo15a_NM_001100245_-_scaffold_143:88388-1680404@INTRON_5,
scaffold_769:84173-87234	scaffold_769:86623-86773	151	35.4	1	derl1_NM_001016723_-_scaffold_769:76078-87449@INTRON_7,
scaffold_883:148317-238526	scaffold_883:226317-226467	151	35.4	1	MGC69309_NM_001004837_-_scaffold_883:1552-247279@INTRON_3,
scaffold_291:436482-444932	scaffold_291:442332-442482	151	35.3	1	dnajb11_NM_203849_-_scaffold_291:409790-496794@INTRON_3,
scaffold_69:1972748-2785795	scaffold_69:2687598-2687698	101	35.1	1	sh2b3_NM_001100247_+_scaffold_69:1972551-2786447@INTRON_1,
scaffold_67:580546-588871	scaffold_67:585046-585196	151	34.5	1	b4galnt1_NM_001126696_-_scaffold_67:561404-643222@INTRON_11,
scaffold_480:58084-72342	scaffold_480:59084-59184	101	34.4	1	snd1_NM_203852_-_scaffold_480:49665-420331@INTRON_4,
scaffold_65:1831410-1935213	scaffold_65:1922760-1922910	151	33.9	1	c16orf45_NM_001142078_-_scaffold_65:1491901-1935285@INTRON_4,
scaffold_41:3269845-3283209	scaffold_41:3280645-3280795	151	33.4	1	dcaf6_NM_001079565_-_scaffold_41:3229866-3313374@INTRON_11,
scaffold_188:895032-900475	scaffold_188:899532-899632	101	33.2	1	banp_NM_203864_-_scaffold_188:703445-903409@INTRON_10,
scaffold_429:76091-111947	scaffold_429:79391-79541	151	33.2	1	sox13_NM_001017004_-_scaffold_429:14899-129409@INTRON_13,
scaffold_163:1548645-2043961	scaffold_163:2018995-2019095	101	33.1	1	spon2_NM_001079092_-_scaffold_163:1547842-2044068@INTRON_1,
scaffold_228:517760-524087	scaffold_228:522710-522860	151	32.9	1	sec11c_NM_001005129_+_scaffold_228:498518-526156@INTRON_4,
scaffold_19:1020285-1023129	scaffold_19:1022035-1022135	101	32.8	1	ccnc_NM_203826_+_scaffold_19:1010068-1024786@INTRON_10,
scaffold_45:2147648-2160134	scaffold_45:2150748-2150848	101	32.8	1	reln_NM_001137612_-_scaffold_45:2010419-2256264@INTRON_59,
scaffold_383:155023-383367	scaffold_383:306023-306173	151	32.6	1	kiaa0895_NM_001114073_-_scaffold_383:120263-654575@INTRON_2,
scaffold_387:563893-588147	scaffold_387:577093-577193	101	32.6	1	ifngr1_NM_001079346_+_scaffold_387:526819-603105@INTRON_3,
scaffold_15:975979-995664	scaffold_15:990629-990779	151	32.5	1	ypel2_NM_001102689_+_scaffold_15:538211-995952@INTRON_8,
scaffold_36:307489-311465	scaffold_36:308239-308389	151	32.5	1	LOC100145209_NM_001126697_+_scaffold_36:295717-331699@INTRON_9,
scaffold_43:2732754-3005984	scaffold_43:2922804-2922904	101	32.4	1	mitf_NM_001100277_-_scaffold_43:2684980-3006141@INTRON_3,
scaffold_45:2544039-2599922	scaffold_45:2579289-2579389	101	32.4	1	srpk3_NM_001102962_-_scaffold_45:2491207-2600208@INTRON_13,
scaffold_383:526880-654370	scaffold_383:574330-574430	101	32.4	1	kiaa0895_NM_001114073_-_scaffold_383:120263-654575@INTRON_5,
scaffold_103:88126-90199	scaffold_103:88376-88476	101	32.3	1	ccdc33_NM_001126682_+_scaffold_103:72847-100276@INTRON_5,
scaffold_106:1858895-1892268	scaffold_106:1887945-1888095	151	32.3	1	rps6ka1_NM_001123459_+_scaffold_106:1858848-1919668@INTRON_1,
scaffold_115:763332-764598	scaffold_115:763882-763982	101	32.2	1	c6orf167_NM_001128044_+_scaffold_115:728644-770275@INTRON_16,
scaffold_140:1174760-1196345	scaffold_140:1177210-1177310	101	32.2	1	tmeff1_NM_001100268_+_scaffold_140:1093531-1225056@INTRON_5,
scaffold_429:693151-732102	scaffold_429:705151-705251	101	32.1	1	c6orf106_NM_001126074_+_scaffold_429:692611-745917@INTRON_1,
scaffold_274:747565-788753	scaffold_274:763615-763715	101	32	1	myo15a_NM_001100245_-_scaffold_274:633077-789049@INTRON_5,
scaffold_55:106195-116822	scaffold_55:108545-108645	101	31.9	1	atp1b3_NM_203756_-_scaffold_55:99022-117024@INTRON_6,
scaffold_1:5149843-5157433	scaffold_1:5154143-5154243	101	31.8	1	eps15_NM_001126628_-_scaffold_1:5133025-5179773@INTRON_13,
scaffold_7:709771-933535	scaffold_7:910571-910721	151	31.8	1	myo15a_NM_001100245_+_scaffold_7:41322-933681@INTRON_2,
scaffold_7:4365979-4415251	scaffold_7:4397829-4397929	101	31.8	1	tnfaip8_NM_001017184_-_scaffold_7:4364575-4415406@INTRON_1,
scaffold_106:1680115-2016415	scaffold_106:1887965-1888115	151	31.7	1	slc39a3_NM_001102697_-_scaffold_106:83848-2455684@INTRON_10,
scaffold_106:1680115-2016415	scaffold_106:2011215-2011365	151	31.7	1	slc39a3_NM_001102697_-_scaffold_106:83848-2455684@INTRON_10,
scaffold_343:448518-496568	scaffold_343:490318-490418	101	31.7	1	ccni_NM_001005690_+_scaffold_343:432412-503101@INTRON_2,
scaffold_298:165134-168579	scaffold_298:165284-165384	101	31.5	1	mthfr_NM_001102994_-_scaffold_298:158016-187627@INTRON_6,
scaffold_138:278149-285557	scaffold_138:283449-283549	101	31.4	1	ccdc3_NM_001017103_-_scaffold_138:260189-286170@INTRON_2,
scaffold_140:327864-363501	scaffold_140:328864-328964	101	31.4	1	gabbr2_NM_001016007_+_scaffold_140:100515-451999@INTRON_8,
scaffold_576:91153-94345	scaffold_576:92003-92153	151	31.4	1	polr3b_NM_001128049_-_scaffold_576:36983-104720@INTRON_22,
scaffold_501:803938-816898	scaffold_501:811088-811188	101	31.2	1	mta1_NM_001011163_-_scaffold_501:781308-828748@INTRON_15,
scaffold_535:269178-769927	scaffold_535:705878-705978	101	31.2	1	hist2h2ab_NM_001030325_-_scaffold_535:268679-770176@INTRON_1,
scaffold_49:2111848-2125819	scaffold_49:2121998-2122098	101	31.1	1	tdp1_NM_001045777_+_scaffold_49:2080504-2136466@INTRON_14,
scaffold_208:1543803-1553385	scaffold_208:1546053-1546153	101	30.8	1	cdk15_NM_001079451_+_scaffold_208:1543775-1640899@INTRON_1,
scaffold_45:2544039-2599922	scaffold_45:2580339-2580439	101	30.7	1	srpk3_NM_001102962_-_scaffold_45:2491207-2600208@INTRON_13,
scaffold_291:1081453-1101974	scaffold_291:1097703-1097853	151	30.7	1	tmeff2_NM_001097223_+_scaffold_291:1081209-1292027@INTRON_1,
scaffold_379:282195-327838	scaffold_379:314945-315045	101	30.7	1	unc93b1_NM_001100253_-_scaffold_379:255521-338606@INTRON_10,
scaffold_49:2111848-2125819	scaffold_49:2122198-2122298	101	30.6	1	tdp1_NM_001045777_+_scaffold_49:2080504-2136466@INTRON_14,
scaffold_83:77103-171208	scaffold_83:104953-105053	101	30.6	1	kiaa0146_NM_001142908_+_scaffold_83:27190-202187@INTRON_8,
scaffold_46:2907904-3168175	scaffold_46:2939304-2939454	151	30.4	1	arsd_NM_001015952_+_scaffold_46:2907883-3233990@INTRON_1,
scaffold_106:84779-503722	scaffold_106:358779-358879	101	30.4	1	slc39a3_NM_001102697_-_scaffold_106:83848-2455684@INTRON_4,
scaffold_106:1292561-1303894	scaffold_106:1301161-1301311	151	30.4	1	gbp2_NM_001078799_-_scaffold_106:1290822-1305864@INTRON_2,
scaffold_189:1189021-1195351	scaffold_189:1189771-1189921	151	30.4	1	clvs1_NM_001097346_+_scaffold_189:1171996-1208931@INTRON_3,
scaffold_51:1345990-1489429	scaffold_51:1376340-1376490	151	30.3	1	rbms1_NM_001097163_+_scaffold_51:1345884-1559954@INTRON_1,
scaffold_95:1171653-1176780	scaffold_95:1175103-1175253	151	30.3	1	kiaa1468_NM_001127054_+_scaffold_95:1150323-1232953@INTRON_3,
scaffold_409:599075-842329	scaffold_409:611325-611425	101	30.2	1	LOC100492947_NM_001195230_+_scaffold_409:598989-842684@INTRON_2,
scaffold_16:1547869-1803167	scaffold_16:1578969-1579069	101	30	1	ypel2_NM_001102689_+_scaffold_16:1547739-2300995@INTRON_1,
scaffold_106:919420-1309606	scaffold_106:1301170-1301320	151	29.9	1	slc39a3_NM_001102697_-_scaffold_106:83848-2455684@INTRON_7,
scaffold_23:2872158-2874466	scaffold_23:2873808-2873958	151	29.6	1	derl2_NM_001016097_-_scaffold_23:2871714-2880732@INTRON_1,
scaffold_34:2508570-2509686	scaffold_34:2508870-2509020	151	29.4	1	ppapdc1b_NM_001128006_+_scaffold_34:2503227-2512205@INTRON_7,
scaffold_278:912053-922109	scaffold_278:921303-921453	151	29.1	1	rnf130_NM_001114240_-_scaffold_278:878287-988809@INTRON_6,
scaffold_120:1540113-1567789	scaffold_120:1542913-1543063	151	28.8	1	cdh13_NM_001103078_+_scaffold_120:1104798-1600265@INTRON_10,
scaffold_88:1001893-1009057	scaffold_88:1006543-1006693	151	28.2	1	LOC100170434_NM_001130208_-_scaffold_88:994366-1009087@INTRON_3,
scaffold_280:20743-22103	scaffold_280:21293-21443	151	26.9	1	ptcd3_NM_001078697_+_scaffold_280:20116-34652@INTRON_2,
scaffold_425:790058-795606	scaffold_425:793758-793908	151	26.2	1	tgfbr1_NM_001015961_+_scaffold_425:754250-806388@INTRON_5,
scaffold_328:128130-146937	scaffold_328:142630-142780	151	26	1	gpr116_NM_001113826_+_scaffold_328:121970-168787@INTRON_2,
scaffold_466:471448-491205	scaffold_466:481148-481298	151	25.8	1	c17orf103_NM_001008089_-_scaffold_466:469816-517507@INTRON_1,
scaffold_201:416935-424457	scaffold_201:422535-422685	151	25.6	1	ribc2_NM_001127422_-_scaffold_201:416788-429390@INTRON_1,
scaffold_2:496380-509798	scaffold_2:498930-499080	151	25.3	1	itgav_NM_001123449_+_scaffold_2:457190-644980@INTRON_4,
scaffold_140:201972-248916	scaffold_140:241822-241972	151	23.7	1	gabbr2_NM_001016007_+_scaffold_140:100515-451999@INTRON_2,
scaffold_576:598979-647892	scaffold_576:633129-633279	151	23.4	1	uhrf1bp1l_NM_001130247_-_scaffold_576:598486-704443@INTRON_1,
scaffold_841:23272-82437	scaffold_841:82022-82172	151	23.3	1	ralyl_NM_001078745_+_scaffold_841:23180-232688@INTRON_1,
scaffold_254:841149-845931	scaffold_254:841899-842049	151	22.4	1	bmper_NM_001044402_+_scaffold_254:771795-887260@INTRON_10,
scaffold_11:4994674-5097744	scaffold_11:5088974-5089124	151	21.6	1	celf2_NM_001102947_+_scaffold_11:4994435-5231750@INTRON_1,
scaffold_744:422261-423910	scaffold_744:422561-422661	101	63.7	2	rnf5_NM_001017071_+_scaffold_744:417144-428379@INTRON_4,
scaffold_71:743158-795200	scaffold_71:785908-786058	151	53.9	2	LOC779492_NM_001134807_-_scaffold_71:349196-795262@INTRON_2,
scaffold_71:743158-795200	scaffold_71:794808-794958	151	53.9	2	LOC779492_NM_001134807_-_scaffold_71:349196-795262@INTRON_2,
scaffold_7:40671-49875	scaffold_7:44321-44421	101	52.5	2	kremen1_NM_001123455_+_scaffold_7:23411-80141@INTRON_2,
scaffold_362:146071-412734	scaffold_362:289571-289721	151	47.9	2	btn2a1_NM_001130216_+_scaffold_362:142052-412801@INTRON_4,
scaffold_744:418893-421504	scaffold_744:419593-419743	151	43.5	2	rnf5_NM_001017071_+_scaffold_744:417144-428379@INTRON_2,
scaffold_493:584132-864048	scaffold_493:599532-599732	201	43.2	2	LOC100037835_NM_001114850_-_scaffold_493:557105-866867@INTRON_2,
scaffold_1142:35178-40244	scaffold_1142:38178-38328	151	40.4	2	cables2_NM_001114489_-_scaffold_1142:24444-40556@INTRON_2,
scaffold_1142:3277-41075	scaffold_1142:38177-38327	151	40.3	2	LOC100145503_NM_001126947_+_scaffold_1142:3190-43499@INTRON_1,
scaffold_7:41779-709718	scaffold_7:44279-44429	151	36	2	myo15a_NM_001100245_+_scaffold_7:41322-933681@INTRON_1,
scaffold_950:174249-181062	scaffold_950:180399-180499	101	33.9	2	ctr9_NM_001005076_-_scaffold_950:165206-181510@INTRON_19,
scaffold_95:2184035-2245205	scaffold_95:2232885-2232985	101	33.3	2	gmds_NM_001037253_+_scaffold_95:2116652-2469750@INTRON_5,
scaffold_41:148571-157587	scaffold_41:149821-149921	101	33.1	2	tulp1_NM_001016482_-_scaffold_41:125078-229182@INTRON_8,
scaffold_7:709771-933535	scaffold_7:910321-910421	101	33	2	myo15a_NM_001100245_+_scaffold_7:41322-933681@INTRON_2,
scaffold_259:1412962-1422945	scaffold_259:1421212-1421312	101	33	2	epyc_NM_001005627_-_scaffold_259:1398996-1443140@INTRON_4,
scaffold_173:774140-775852	scaffold_173:774790-774890	101	30.3	2	fgfr1op_NM_001016758_+_scaffold_173:742109-778097@INTRON_13,
scaffold_16:1547869-1803167	scaffold_16:1785269-1785419	151	25.4	2	ypel2_NM_001102689_+_scaffold_16:1547739-2300995@INTRON_1,
scaffold_16:1958218-2300589	scaffold_16:2092718-2092868	151	25.1	2	ypel2_NM_001102689_+_scaffold_16:1547739-2300995@INTRON_4,
scaffold_474:371345-601733	scaffold_474:551445-551545	101	59.7	3	commd2_NM_001113076_-_scaffold_474:188066-601774@INTRON_3,
scaffold_238:1069922-1118626	scaffold_238:1104472-1104622	151	56.4	3	btrc_NM_001016386_-_scaffold_238:1014158-1121027@INTRON_12,
scaffold_238:1069922-1118626	scaffold_238:1098022-1098222	201	51.6	3	btrc_NM_001016386_-_scaffold_238:1014158-1121027@INTRON_12,
scaffold_386:645305-1101085	scaffold_386:1038155-1038305	151	33.8	3	ifit5_NM_001142188_-_scaffold_386:175917-1101219@INTRON_6,
scaffold_16:1547869-1803167	scaffold_16:1784719-1784819	101	33.2	3	ypel2_NM_001102689_+_scaffold_16:1547739-2300995@INTRON_1,
scaffold_79:1772801-2156564	scaffold_79:1836651-1836751	101	31.6	3	slc39a3_NM_001102697_+_scaffold_79:680766-2284175@INTRON_13,
scaffold_115:763332-764598	scaffold_115:764182-764282	101	30	3	c6orf167_NM_001128044_+_scaffold_115:728644-770275@INTRON_16,
scaffold_578:491739-563864	scaffold_578:525039-525139	101	33.6	4	LOC733855_NM_001045601_+_scaffold_578:490506-667922@INTRON_2,
scaffold_41:3269845-3283209	scaffold_41:3280345-3280495	151	24.6	4	dcaf6_NM_001079565_-_scaffold_41:3229866-3313374@INTRON_11,
scaffold_422:108546-193707	scaffold_422:154996-155146	151	34.1	5	poll_NM_001100246_+_scaffold_422:108459-193789@INTRON_1,
scaffold_196:290332-394732	scaffold_196:330882-330982	101	32.3	5	grm7_NM_001113008_+_scaffold_196:289716-556761@INTRON_1,
scaffold_69:1972748-2785795	scaffold_69:2327148-2327248	101	31.7	5	sh2b3_NM_001100247_+_scaffold_69:1972551-2786447@INTRON_1,
scaffold_6:3927129-4384212	scaffold_6:4145179-4145329	151	27.1	5	slc39a3_NM_001102697_-_scaffold_6:2781856-5867994@INTRON_9,
scaffold_6:4127277-4149603	scaffold_6:4145177-4145327	151	26.7	5	vac14_NM_001142192_+_scaffold_6:4109725-4192899@INTRON_9,
scaffold_115:857131-874804	scaffold_115:869631-869731	101	36.4	6	klhl32_NM_001016857_-_scaffold_115:771294-916007@INTRON_8,
scaffold_550:460681-462876	scaffold_550:462131-462231	101	33.6	6	rpp30_NM_001016584_-_scaffold_550:457229-481977@INTRON_5,
scaffold_343:448518-496568	scaffold_343:490018-490118	101	32.8	6	ccni_NM_001005690_+_scaffold_343:432412-503101@INTRON_2,
scaffold_152:1104097-1111514	scaffold_152:1109047-1109197	151	29.9	6	sirt4_NM_001045628_+_scaffold_152:1103851-1507544@INTRON_3,
scaffold_140:201972-248916	scaffold_140:242122-242222	101	51.9	7	gabbr2_NM_001016007_+_scaffold_140:100515-451999@INTRON_2,
scaffold_343:448518-496568	scaffold_343:490168-490268	101	36.5	7	ccni_NM_001005690_+_scaffold_343:432412-503101@INTRON_2,
scaffold_69:2325082-2329374	scaffold_69:2327132-2327232	101	31.9	7	aldh9a1_NM_001006904_+_scaffold_69:2323488-2342041@INTRON_2,
scaffold_416:139116-152788	scaffold_416:151466-151566	101	41.8	8	tmem63c_NM_001097199_+_scaffold_416:139054-189200@INTRON_1,
scaffold_45:2544039-2599922	scaffold_45:2580039-2580139	101	31	8	srpk3_NM_001102962_-_scaffold_45:2491207-2600208@INTRON_13,
scaffold_917:210144-225902	scaffold_917:217544-217694	151	31	8	arhgef10l_NM_001127901_-_scaffold_917:156027-248367@INTRON_19,
scaffold_17:1137134-1163956	scaffold_17:1146884-1146984	101	32.2	9	sgsm1_NM_001112951_+_scaffold_17:1115830-1186970@INTRON_3,
scaffold_115:857131-874804	scaffold_115:869781-869881	101	39.6	10	klhl32_NM_001016857_-_scaffold_115:771294-916007@INTRON_8,
scaffold_288:1134882-1167955	scaffold_288:1162532-1162632	101	35.7	10	LOC100145527_NM_001126967_-_scaffold_288:1112342-1189439@INTRON_7,
scaffold_966:72041-107857	scaffold_966:74391-74491	101	36.7	11	fastkd3_NM_001142147_+_scaffold_966:71912-241109@INTRON_1,
scaffold_291:447209-465196	scaffold_291:453959-454059	101	34.8	11	dnajb11_NM_203849_-_scaffold_291:409790-496794@INTRON_5,
scaffold_498:655640-662655	scaffold_498:657340-657490	151	34.1	11	dmbt1_NM_001142217_+_scaffold_498:627850-712316@INTRON_4,
scaffold_498:655638-662662	scaffold_498:657338-657488	151	34	11	dmbt1_NM_001142217_+_scaffold_498:627814-662860@INTRON_5,
scaffold_498:655632-662656	scaffold_498:657332-657482	151	33.6	11	dmbt1_NM_001142217_+_scaffold_498:627796-662860@INTRON_5,
scaffold_113:862408-870407	scaffold_113:867958-868058	101	46.2	12	fcho2_NM_001142071_+_scaffold_113:832210-902166@INTRON_5,
scaffold_386:645305-1101085	scaffold_386:1038755-1038905	151	39.4	13	ifit5_NM_001142188_-_scaffold_386:175917-1101219@INTRON_6,
scaffold_17:1137134-1163956	scaffold_17:1144134-1144284	151	39.2	14	sgsm1_NM_001112951_+_scaffold_17:1115830-1186970@INTRON_3,
scaffold_124:206654-210569	scaffold_124:207454-207554	101	33.2	14	LOC100170615_NM_001130378_+_scaffold_124:200571-220805@INTRON_3,
scaffold_115:857131-874804	scaffold_115:869931-870031	101	36.6	15	klhl32_NM_001016857_-_scaffold_115:771294-916007@INTRON_8,
scaffold_154:958812-972051	scaffold_154:964762-964862	101	33.8	16	atp2b3_NM_001131043_+_scaffold_154:878268-1011465@INTRON_6,
scaffold_140:1174760-1196345	scaffold_140:1180460-1180560	101	32.1	16	tmeff1_NM_001100268_+_scaffold_140:1093531-1225056@INTRON_5,
scaffold_95:360285-364815	scaffold_95:360985-361135	151	35.7	17	LOC100145511_NM_001126954_+_scaffold_95:350378-368730@INTRON_12,
scaffold_68:2684851-2714697	scaffold_68:2699551-2699701	151	28.6	17	rtn1_NM_001085350_-_scaffold_68:2677137-2762253@INTRON_6,
scaffold_344:725160-732774	scaffold_344:726360-726510	151	36.7	18	LOC100158523_NM_001127960_+_scaffold_344:663538-753973@INTRON_11,
scaffold_16:1547869-1803167	scaffold_16:1785069-1785169	101	33.9	18	ypel2_NM_001102689_+_scaffold_16:1547739-2300995@INTRON_1,
scaffold_135:1214666-1417655	scaffold_135:1237016-1237116	101	42.3	19	chd9_NM_001045586_+_scaffold_135:1214575-1809035@INTRON_1,
scaffold_95:360285-364815	scaffold_95:362185-362285	101	40.6	20	LOC100145511_NM_001126954_+_scaffold_95:350378-368730@INTRON_12,
scaffold_386:645305-1101085	scaffold_386:1050005-1050105	101	47.4	21	ifit5_NM_001142188_-_scaffold_386:175917-1101219@INTRON_6,
scaffold_344:725160-732774	scaffold_344:728510-728660	151	36.5	21	LOC100158523_NM_001127960_+_scaffold_344:663538-753973@INTRON_11,
scaffold_124:485235-505423	scaffold_124:496735-496835	101	36.1	27	cbl_NM_001128638_+_scaffold_124:472751-524664@INTRON_2,
scaffold_142:1422926-1439121	scaffold_142:1428226-1428326	101	32	28	mett10d_NM_001130217_-_scaffold_142:1401348-1440550@INTRON_7,
scaffold_213:1400827-1453928	scaffold_213:1415227-1415327	101	32.6	29	lrrc16a_NM_001127140_+_scaffold_213:1393364-1497627@INTRON_2,
scaffold_45:2160205-2196600	scaffold_45:2191205-2191305	101	31.6	29	reln_NM_001137612_-_scaffold_45:2010419-2256264@INTRON_60,
scaffold_17:1137134-1163956	scaffold_17:1143534-1143634	101	32.7	31	sgsm1_NM_001112951_+_scaffold_17:1115830-1186970@INTRON_3,
scaffold_608:415468-440397	scaffold_608:429668-429768	101	32.1	33	plekha6_NM_001097246_+_scaffold_608:401920-654488@INTRON_3,
scaffold_508:678396-681622	scaffold_508:679696-679796	101	31.5	33	cyfip2_NM_001110053_-_scaffold_508:672185-726188@INTRON_7,
scaffold_92:201746-319680	scaffold_92:281896-281996	101	35	34	cdkn2d_NM_001079371_-_scaffold_92:201270-320889@INTRON_3,
scaffold_41:190029-200298	scaffold_41:193179-193279	101	33.1	42	tulp1_NM_001016482_-_scaffold_41:125078-229182@INTRON_10,
scaffold_321:910628-940104	scaffold_321:917778-917878	101	37.4	43	txndc9_NM_001079070_+_scaffold_321:909787-940279@INTRON_1,
scaffold_554:4160-21822	scaffold_554:9810-9910	101	34.8	50	pcsk5_NM_001079038_-_scaffold_554:4070-92883@INTRON_1,
scaffold_274:522226-541252	scaffold_274:534226-534326	101	32.6	53	fuca2_NM_001011291_+_scaffold_274:521936-557942@INTRON_1,
scaffold_415:745067-864516	scaffold_415:825367-825467	101	32.8	54	syt4_NM_001171514_-_scaffold_415:512204-867856@INTRON_2,
scaffold_331:175308-493206	scaffold_331:385358-385458	101	32.2	54	opcml_NM_001079019_-_scaffold_331:51689-493354@INTRON_2,
scaffold_386:645305-1101085	scaffold_386:1037905-1038055	151	27.5	55	ifit5_NM_001142188_-_scaffold_386:175917-1101219@INTRON_6,
scaffold_498:655640-662655	scaffold_498:657090-657240	151	27.6	56	dmbt1_NM_001142217_+_scaffold_498:627850-712316@INTRON_4,
scaffold_498:655638-662662	scaffold_498:657088-657238	151	27.5	56	dmbt1_NM_001142217_+_scaffold_498:627814-662860@INTRON_5,
scaffold_498:655632-662656	scaffold_498:657082-657232	151	27.1	56	dmbt1_NM_001142217_+_scaffold_498:627796-662860@INTRON_5,
scaffold_152:1104097-1111514	scaffold_152:1109297-1109397	101	37.7	65	sirt4_NM_001045628_+_scaffold_152:1103851-1507544@INTRON_3,
scaffold_152:1104097-1111514	scaffold_152:1110997-1111097	101	37.2	72	sirt4_NM_001045628_+_scaffold_152:1103851-1507544@INTRON_3,
scaffold_386:645305-1101085	scaffold_386:1049755-1049855	101	37.2	72	ifit5_NM_001142188_-_scaffold_386:175917-1101219@INTRON_6,
scaffold_13:3160394-3254301	scaffold_13:3232344-3232444	101	30.1	77	dach1_NM_001078708_+_scaffold_13:3159588-3365066@INTRON_1,
scaffold_90:93446-289130	scaffold_90:96896-96996	101	30.1	77	syt4_NM_001171514_-_scaffold_90:93400-289196@INTRON_1,
scaffold_113:347783-383094	scaffold_113:382683-382783	101	30.1	77	LOC733866_NM_001045606_+_scaffold_113:346199-387206@INTRON_2,
scaffold_194:148970-151844	scaffold_194:150220-150320	101	30.2	78	adprhl2_NM_001016184_+_scaffold_194:141645-156442@INTRON_3,
scaffold_162:264279-266803	scaffold_162:266629-266729	101	30.2	83	rps6_NM_203821_+_scaffold_162:260990-268062@INTRON_3,
scaffold_5:4489661-4654623	scaffold_5:4519061-4519161	101	30.1	85	ifit5_NM_001142188_-_scaffold_5:4404167-4654764@INTRON_3,
scaffold_79:1772801-2156564	scaffold_79:1837501-1837601	101	32.4	89	slc39a3_NM_001102697_+_scaffold_79:680766-2284175@INTRON_13,
scaffold_868:267219-279696	scaffold_868:272169-272269	101	31.7	90	ddx10_NM_001102681_-_scaffold_868:265736-327322@INTRON_1,
scaffold_247:1633157-1639535	scaffold_247:1638657-1638757	101	31.4	90	nid2_NM_001097263_+_scaffold_247:1597501-1643229@INTRON_17,
scaffold_283:645958-649427	scaffold_283:648708-648808	101	33.4	91	atp6v0d1_NM_001017310_-_scaffold_283:638059-708809@INTRON_3,
scaffold_651:851-29915	scaffold_651:11501-11601	101	33.3	92	dync1i1_NM_001112911_-_scaffold_651:708-155818@INTRON_1,
scaffold_79:2621157-2633042	scaffold_79:2631657-2631757	101	30.2	95	b4galt1.1_NM_001126960_-_scaffold_79:2604932-2659367@INTRON_4,

## Sheet: Stage 10 Upstream
Upstream Region	Cluster Region	Cluster Length (nt)	Mean Cluster Density	Number of clusters in genome	Gene Annotation (RefSeq)
scaffold_1831:27342-32342	scaffold_1831:28992-29142	151	30.1	0	dmbt1_NM_001142217_-_scaffold_1831:22450-27342@UPSTREAM,
scaffold_49:2246050-2251050	scaffold_49:2249400-2249550	151	52.5	1	psmc1_NM_001045689_+_scaffold_49:2251050-2260216@UPSTREAM,
scaffold_49:2248884-2253884	scaffold_49:2249384-2249534	151	52.2	1	mrps10_NM_001016991_-_scaffold_49:2242003-2248884@UPSTREAM,
scaffold_107:91430-96430	scaffold_107:93880-94030	151	48.5	1	sgcb_NM_001142012_-_scaffold_107:68305-91430@UPSTREAM,
scaffold_950:181510-186510	scaffold_950:185310-186260	951	47.9	1	ctr9_NM_001005076_-_scaffold_950:165206-181510@UPSTREAM,
scaffold_328:300999-305999	scaffold_328:302799-302949	151	47	1	mep1a_NM_001015767_-_scaffold_328:279657-300999@UPSTREAM,
scaffold_274:1191503-1196503	scaffold_274:1193903-1194053	151	46.5	1	serinc1_NM_001011399_-_scaffold_274:1180633-1191503@UPSTREAM,
scaffold_55:209250-214250	scaffold_55:210150-210300	151	45.9	1	rnf7_NM_001114261_-_scaffold_55:205134-209250@UPSTREAM,
scaffold_546:622185-627185	scaffold_546:622985-623185	201	45.2	1	hdac3_NM_001016883_-_scaffold_546:604752-622185@UPSTREAM,
scaffold_811:295784-300784	scaffold_811:299584-299684	101	45	1	LOC100379536_NM_001173439_+_scaffold_811:300784-306760@UPSTREAM,
scaffold_10:3569605-3574605	scaffold_10:3573405-3573555	151	44.1	1	rlim_NM_001016091_+_scaffold_10:3574605-3586219@UPSTREAM,
scaffold_4346:2984-7984	scaffold_4346:6734-6884	151	44	1	LOC100145508_NM_001126952_+_scaffold_4346:7984-8765@UPSTREAM,
scaffold_415:867856-872856	scaffold_415:871506-871656	151	40.3	1	syt4_NM_001171514_-_scaffold_415:512204-867856@UPSTREAM,
scaffold_164:844421-849421	scaffold_164:845471-845621	151	40.2	1	atp5j_NM_001017042_-_scaffold_164:838752-844421@UPSTREAM,
scaffold_550:481977-486977	scaffold_550:486377-486527	151	40.1	1	rpp30_NM_001016584_-_scaffold_550:457229-481977@UPSTREAM,
scaffold_536:148054-153054	scaffold_536:150904-151054	151	40	1	blvra_NM_001006895_+_scaffold_536:153054-160867@UPSTREAM,
scaffold_90:2039152-2044152	scaffold_90:2041752-2041902	151	39.3	1	ing2_NM_001017044_+_scaffold_90:2044152-2046784@UPSTREAM,
scaffold_75:1249420-1254420	scaffold_75:1251970-1252120	151	38.9	1	tspan14_NM_001007870_-_scaffold_75:1224623-1249420@UPSTREAM,
scaffold_290:1199290-1204290	scaffold_290:1201540-1201740	201	38.9	1	t2r9_NM_001172001_-_scaffold_290:1198390-1199290@UPSTREAM,
scaffold_409:349267-354267	scaffold_409:353317-353417	101	38.4	1	c19orf47_NM_001005016_+_scaffold_409:354267-363935@UPSTREAM,
scaffold_278:684752-689752	scaffold_278:685802-685902	101	37.8	1	tnip1_NM_001079235_-_scaffold_278:634613-684752@UPSTREAM,
scaffold_201:419758-424758	scaffold_201:422558-422658	101	37.4	1	ptp4a1_NM_001008022_+_scaffold_201:424758-430299@UPSTREAM,
scaffold_591:482482-487482	scaffold_591:486682-486832	151	37.3	1	aip_NM_001102749_-_scaffold_591:412964-482482@UPSTREAM,
scaffold_481:538873-543873	scaffold_481:541623-541723	101	36.6	1	ccdc97_NM_001016433_+_scaffold_481:543873-547664@UPSTREAM,
scaffold_76:2210151-2215151	scaffold_76:2214101-2214201	101	36.5	1	LOC100135092_NM_001113831_+_scaffold_76:2215151-2259554@UPSTREAM,
scaffold_154:1490811-1495811	scaffold_154:1491311-1491461	151	36.5	1	hsd17b10_NM_001016511_-_scaffold_154:1487319-1490811@UPSTREAM,
scaffold_123:682036-687036	scaffold_123:682786-682886	101	36	1	grwd1_NM_203937_-_scaffold_123:676441-682036@UPSTREAM,
scaffold_950:179408-184408	scaffold_950:180058-180358	301	35.8	1	ctr9_NM_001005076_-_scaffold_950:179271-179408@UPSTREAM,
scaffold_31:1314581-1319581	scaffold_31:1315931-1316081	151	35.7	1	mospd1_NM_001015761_-_scaffold_31:1291301-1314581@UPSTREAM,
scaffold_598:136837-141837	scaffold_598:139987-140137	151	35.3	1	tmx2_NM_001005010_-_scaffold_598:89833-136837@UPSTREAM,
scaffold_1015:101623-106623	scaffold_1015:104623-104773	151	34.8	1	limd1_NM_001016606_-_scaffold_1015:85750-101623@UPSTREAM,
scaffold_190:1103642-1108642	scaffold_190:1103992-1104142	151	34.6	1	LOC550107_NM_001017353_-_scaffold_190:1097528-1103642@UPSTREAM,
scaffold_332:677626-682626	scaffold_332:681376-681526	151	33.7	1	ankrd9_NM_001102746_-_scaffold_332:673828-677626@UPSTREAM,
scaffold_429:835807-840807	scaffold_429:837257-837457	201	33.7	1	LOC100037835_NM_001114850_-_scaffold_429:832402-835807@UPSTREAM,
scaffold_106:2010336-2015336	scaffold_106:2011236-2011386	151	33.5	1	gpn2_NM_001030474_-_scaffold_106:2007598-2010336@UPSTREAM,
scaffold_392:94274-99274	scaffold_392:96074-96274	201	33.5	1	enam_NM_001145743_+_scaffold_392:99274-115320@UPSTREAM,
scaffold_414:739003-744003	scaffold_414:743553-743703	151	33.2	1	nadk.1_NM_001004896_-_scaffold_414:698065-739003@UPSTREAM,
scaffold_742:116279-121279	scaffold_742:118729-118929	201	33	1	tmem5_NM_001126976_+_scaffold_742:121279-128566@UPSTREAM,
scaffold_229:110683-115683	scaffold_229:113833-113933	101	32.5	1	adh6_NM_001011423_+_scaffold_229:115683-136134@UPSTREAM,
scaffold_229:110683-115683	scaffold_229:114783-114933	151	32.4	1	adh6_NM_001011423_+_scaffold_229:115683-136134@UPSTREAM,
scaffold_80:1996100-2001100	scaffold_80:1998150-1998250	101	31.3	1	hmgb1_NM_203895_+_scaffold_80:2001100-2009791@UPSTREAM,
scaffold_74:206355-211355	scaffold_74:210605-210705	101	30.9	1	acat2_NM_203634_+_scaffold_74:211355-225018@UPSTREAM,
scaffold_267:1322191-1327191	scaffold_267:1324391-1324541	151	30.6	1	slc13a2_NM_001008097_+_scaffold_267:1327191-1351788@UPSTREAM,
scaffold_2:1388272-1393272	scaffold_2:1388822-1388922	101	30.3	1	rnf216_NM_001016834_-_scaffold_2:1275208-1388272@UPSTREAM,
scaffold_693:253466-258466	scaffold_693:254016-254166	151	29.3	1	ptpn3_NM_001079462_+_scaffold_693:258466-490908@UPSTREAM,
scaffold_264:719483-724483	scaffold_264:722783-722933	151	27.3	1	LOC100124851_NM_001102813_+_scaffold_264:724483-731938@UPSTREAM,
scaffold_2:1388272-1393272	scaffold_2:1389822-1389972	151	24.3	1	rnf216_NM_001016834_-_scaffold_2:1275208-1388272@UPSTREAM,
scaffold_74:206355-211355	scaffold_74:210355-210505	151	43.2	2	acat2_NM_203634_+_scaffold_74:211355-225018@UPSTREAM,
scaffold_950:179408-184408	scaffold_950:180408-180508	101	36.6	2	ctr9_NM_001005076_-_scaffold_950:179271-179408@UPSTREAM,
scaffold_769:83286-88286	scaffold_769:86636-86736	101	51.7	3	wdr67_NM_001005061_+_scaffold_769:88286-108513@UPSTREAM,
scaffold_283:1461845-1466845	scaffold_283:1465345-1465445	101	48.8	4	tox3_NM_001128012_+_scaffold_283:1466845-1467150@UPSTREAM,
scaffold_15:4222779-4227779	scaffold_15:4226079-4226179	101	43.6	4	pde1a_NM_001102974_+_scaffold_15:4227779-4386231@UPSTREAM,
scaffold_117:854724-859724	scaffold_117:856274-856374	101	32.9	4	nono_NM_205829_+_scaffold_117:859724-869366@UPSTREAM,
scaffold_1219:12015-17015	scaffold_1219:16115-16215	101	32.4	4	rnf168_NM_001126497_+_scaffold_1219:17015-26994@UPSTREAM,
scaffold_33:4089194-4094194	scaffold_33:4090744-4090844	101	33.8	10	rnf144b_NM_001113670_+_scaffold_33:4094194-4131895@UPSTREAM,
scaffold_1219:12015-17015	scaffold_1219:15865-15965	101	30.8	16	rnf168_NM_001126497_+_scaffold_1219:17015-26994@UPSTREAM,
scaffold_253:1164278-1169278	scaffold_253:1164978-1165078	101	31.5	17	nipa2_NM_001011172_-_scaffold_253:1152903-1164278@UPSTREAM,
scaffold_75:1249420-1254420	scaffold_75:1252270-1252370	101	33.2	18	tspan14_NM_001007870_-_scaffold_75:1224623-1249420@UPSTREAM,
scaffold_33:2334431-2339431	scaffold_33:2337431-2337581	151	36.7	20	rbm22_NM_203777_+_scaffold_33:2339431-2351156@UPSTREAM,
scaffold_733:303258-308258	scaffold_733:306508-306658	151	36.5	21	hbe1_NM_001016495_+_scaffold_733:308258-323428@UPSTREAM,
scaffold_938:239579-244579	scaffold_938:243279-243379	101	39.7	23	socs6_NM_001102770_-_scaffold_938:227138-239579@UPSTREAM,
scaffold_346:672580-677580	scaffold_346:677430-677530	101	31.9	54	dynlrb2_NM_001016395_-_scaffold_346:669019-672580@UPSTREAM,
scaffold_15:4222779-4227779	scaffold_15:4226329-4226429	101	36.8	72	pde1a_NM_001102974_+_scaffold_15:4227779-4386231@UPSTREAM,
scaffold_18523:2171-7171	scaffold_18523:2671-2771	101	32.5	94	cfh_NM_203887_-_scaffold_18523:1102-2171@UPSTREAM,

## Sheet: Stage 18 Intron
Intron Region	Cluster Region	Cluster Length (nt)	Mean Cluster Density	Number of clusters in genome	Gene Annotation (RefSeq)
scaffold_1142:3277-41075	scaffold_1142:32477-33427	951	65.1	0	LOC100145503_NM_001126947_+_scaffold_1142:3190-43499@INTRON_1,
scaffold_1142:24572-34885	scaffold_1142:32522-33472	951	64.9	0	cables2_NM_001114489_-_scaffold_1142:24444-40556@INTRON_1,
scaffold_238:1069922-1118626	scaffold_238:1104422-1104722	301	46.5	0	btrc_NM_001016386_-_scaffold_238:1014158-1121027@INTRON_12,
scaffold_152:1345331-1349677	scaffold_152:1348781-1348881	101	42.2	0	fer_NM_001016902_-_scaffold_152:1330044-1377914@INTRON_5,
scaffold_135:1214666-1417655	scaffold_135:1299516-1299616	101	39.1	0	chd9_NM_001045586_+_scaffold_135:1214575-1809035@INTRON_1,
scaffold_821:204483-242773	scaffold_821:240233-240433	201	35.8	0	igsf21_NM_001078772_+_scaffold_821:153666-249814@INTRON_3,
scaffold_531:59534-465760	scaffold_531:143084-143184	101	35.7	0	cables2_NM_001114489_-_scaffold_531:58890-703245@INTRON_1,
scaffold_982:57963-69727	scaffold_982:65763-65963	201	35.4	0	znf300_NM_001016118_+_scaffold_982:52021-73563@INTRON_6,
scaffold_79:1772801-2156564	scaffold_79:1837451-1837601	151	34.4	0	slc39a3_NM_001102697_+_scaffold_79:680766-2284175@INTRON_13,
scaffold_152:1104097-1111514	scaffold_152:1110747-1110897	151	33.6	0	sirt4_NM_001045628_+_scaffold_152:1103851-1507544@INTRON_3,
scaffold_1180:55105-67788	scaffold_1180:59105-59205	101	33.6	0	kcnt2_NM_001170513_+_scaffold_1180:54922-118790@INTRON_1,
scaffold_56:3492389-3497078	scaffold_56:3495139-3495239	101	33.3	0	fam126a_NM_001079289_+_scaffold_56:3474990-3525553@INTRON_2,
scaffold_470:616167-659878	scaffold_470:643517-643617	101	32.9	0	ncoa1_NM_001112912_+_scaffold_470:615956-838333@INTRON_1,
scaffold_982:53654-56689	scaffold_982:55554-55654	101	32.9	0	znf300_NM_001016118_+_scaffold_982:52021-73563@INTRON_2,
scaffold_99:1446550-1503872	scaffold_99:1478050-1478200	151	32.3	0	tsnare1_NM_001112923_+_scaffold_99:1366510-1504214@INTRON_9,
scaffold_556:584721-671903	scaffold_556:661871-661971	101	30.9	0	LOC100135382_NM_001114048_-_scaffold_556:572093-672150@INTRON_4,
scaffold_45:160995-177579	scaffold_45:162745-162845	101	30.7	0	cacna2d1_NM_001097269_+_scaffold_45:19090-313938@INTRON_5,
scaffold_27:3492022-3594384	scaffold_27:3552922-3553022	101	30.2	0	gdpd5_NM_001127121_+_scaffold_27:1776726-3883646@INTRON_10,
scaffold_989:79725-92152	scaffold_989:91875-91975	101	30.2	0	dnz1_NM_001016218_+_scaffold_989:79582-97263@INTRON_1,
scaffold_2:2973231-3083363	scaffold_2:3063731-3063881	151	29.6	0	LOC100127543_NM_001112922_-_scaffold_2:2854824-3162318@INTRON_3,
scaffold_152:1336643-1448161	scaffold_152:1348743-1348893	151	29.2	0	sirt4_NM_001045628_+_scaffold_152:1103851-1507544@INTRON_7,
scaffold_146:1348335-1356485	scaffold_146:1353185-1353335	151	27.4	0	vrk3_NM_001044457_+_scaffold_146:1334063-1378280@INTRON_4,
scaffold_917:96153-113230	scaffold_917:108403-108553	151	26.2	0	LOC100145466_NM_001126918_+_scaffold_917:91434-119111@INTRON_3,
scaffold_917:210144-225902	scaffold_917:219044-219444	401	86.7	1	arhgef10l_NM_001127901_-_scaffold_917:156027-248367@INTRON_19,
scaffold_535:60205-324154	scaffold_535:179355-180005	651	71	1	zadh2_NM_001011370_+_scaffold_535:60153-605646@INTRON_1,
scaffold_495:651347-662635	scaffold_495:654097-654247	151	69	1	commd1_NM_001122721_+_scaffold_495:651153-697466@INTRON_1,
scaffold_329:1010717-1025595	scaffold_329:1016617-1016767	151	66.1	1	cryl1_NM_001127026_-_scaffold_329:992921-1039446@INTRON_5,
scaffold_243:237952-243728	scaffold_243:240152-240252	101	61.8	1	gnptab_NM_001097235_+_scaffold_243:225759-269611@INTRON_5,
scaffold_6:4127277-4149603	scaffold_6:4144877-4145027	151	61.5	1	vac14_NM_001142192_+_scaffold_6:4109725-4192899@INTRON_9,
scaffold_6:3927129-4384212	scaffold_6:4144879-4145029	151	61.5	1	slc39a3_NM_001102697_-_scaffold_6:2781856-5867994@INTRON_9,
scaffold_32:3795084-3835438	scaffold_32:3820984-3821134	151	60.4	1	adam12_NM_001040014_+_scaffold_32:3589463-3881697@INTRON_11,
scaffold_598:137267-145003	scaffold_598:140017-140117	101	60.2	1	med19_NM_001101806_+_scaffold_598:137077-169874@INTRON_1,
scaffold_310:851353-860061	scaffold_310:858753-858853	101	58.5	1	cpped1_NM_001016142_-_scaffold_310:821842-860195@INTRON_3,
scaffold_196:290332-394732	scaffold_196:387032-387182	151	58.4	1	grm7_NM_001113008_+_scaffold_196:289716-556761@INTRON_1,
scaffold_2:1340889-1356905	scaffold_2:1348239-1348339	101	55.6	1	rnf216_NM_001016834_-_scaffold_2:1275208-1388272@INTRON_14,
scaffold_69:935963-938500	scaffold_69:936413-936663	251	53.7	1	cbx6_NM_001016617_+_scaffold_69:924572-939571@INTRON_4,
scaffold_29:2060859-2204052	scaffold_29:2108959-2109059	101	53.2	1	becn1_NM_001033940_-_scaffold_29:2034824-2208501@INTRON_10,
scaffold_417:559637-569966	scaffold_417:561787-561987	201	52.6	1	oaz2_NM_001113112_-_scaffold_417:550035-570180@INTRON_4,
scaffold_2:3744415-3754881	scaffold_2:3751115-3751215	101	52.4	1	agpat4_NM_001011265_+_scaffold_2:3718035-3759067@INTRON_5,
scaffold_232:1467733-1504098	scaffold_232:1496933-1497083	151	51.3	1	gtdc1_NM_001007983_+_scaffold_232:1425988-1565344@INTRON_4,
scaffold_99:1446550-1503872	scaffold_99:1487800-1487900	101	51	1	tsnare1_NM_001112923_+_scaffold_99:1366510-1504214@INTRON_9,
scaffold_483:474593-811871	scaffold_483:682993-683143	151	51	1	c16orf57_NM_001127143_+_scaffold_483:474387-811964@INTRON_1,
scaffold_529:837368-841752	scaffold_529:840268-840468	201	50.8	1	rnf126_NM_001006734_-_scaffold_529:820829-841946@INTRON_6,
scaffold_729:57478-368440	scaffold_729:295778-295878	101	50.5	1	rab11fip4_NM_001102700_+_scaffold_729:15260-369371@INTRON_3,
scaffold_248:190002-192407	scaffold_248:190852-191002	151	50.3	1	gpcpd1_NM_001142145_+_scaffold_248:162175-200072@INTRON_17,
scaffold_246:1635683-1639029	scaffold_246:1638683-1638833	151	50.1	1	rab15_NM_001016372_+_scaffold_246:1614447-1641068@INTRON_6,
scaffold_466:462919-517455	scaffold_466:481169-481269	101	50.1	1	tmem11_NM_001016689_-_scaffold_466:462102-517505@INTRON_1,
scaffold_84:1535072-1618832	scaffold_84:1596522-1596672	151	49.5	1	cdh2_NM_001127418_+_scaffold_84:1522000-1652506@INTRON_2,
scaffold_220:1703402-1708283	scaffold_220:1706452-1706602	151	49.3	1	prkcz_NM_001100265_-_scaffold_220:1599873-1708643@INTRON_17,
scaffold_917:210144-225902	scaffold_917:218794-219044	251	49.3	1	arhgef10l_NM_001127901_-_scaffold_917:156027-248367@INTRON_19,
scaffold_501:803938-816898	scaffold_501:810788-810938	151	49.1	1	mta1_NM_001011163_-_scaffold_501:781308-828748@INTRON_15,
scaffold_79:1772801-2156564	scaffold_79:1953651-1953751	101	48.7	1	slc39a3_NM_001102697_+_scaffold_79:680766-2284175@INTRON_13,
scaffold_106:84779-503722	scaffold_106:138779-138879	101	48	1	slc39a3_NM_001102697_-_scaffold_106:83848-2455684@INTRON_4,
scaffold_159:1528117-1557741	scaffold_159:1536767-1536967	201	47.6	1	gnai2_NM_203919_-_scaffold_159:1512727-1558060@INTRON_7,
scaffold_850:298675-314846	scaffold_850:301475-301625	151	47.3	1	prkar1b_NM_001079454_+_scaffold_850:294848-318660@INTRON_2,
scaffold_1142:3277-41075	scaffold_1142:37877-38127	251	47	1	LOC100145503_NM_001126947_+_scaffold_1142:3190-43499@INTRON_1,
scaffold_1142:35178-40244	scaffold_1142:37878-38128	251	47	1	cables2_NM_001114489_-_scaffold_1142:24444-40556@INTRON_2,
scaffold_750:229825-248223	scaffold_750:235825-235925	101	46.7	1	cul3_NM_001015975_-_scaffold_750:211514-248473@INTRON_15,
scaffold_474:371345-601733	scaffold_474:551395-551545	151	46.4	1	commd2_NM_001113076_-_scaffold_474:188066-601774@INTRON_3,
scaffold_497:257122-308813	scaffold_497:271572-271772	201	45.9	1	c10orf54_NM_001011488_+_scaffold_497:256954-317894@INTRON_1,
scaffold_135:129934-137489	scaffold_135:132834-132934	101	45.5	1	map7d2_NM_001079229_+_scaffold_135:96695-161300@INTRON_3,
scaffold_1142:3277-41075	scaffold_1142:38177-38377	201	45.3	1	LOC100145503_NM_001126947_+_scaffold_1142:3190-43499@INTRON_1,
scaffold_1142:35178-40244	scaffold_1142:38178-38378	201	45.3	1	cables2_NM_001114489_-_scaffold_1142:24444-40556@INTRON_2,
scaffold_26:2331699-2339154	scaffold_26:2335899-2335999	101	45.2	1	ube2e2_NM_001126511_-_scaffold_26:2327849-2444852@INTRON_2,
scaffold_37:2917615-2921758	scaffold_37:2918915-2919065	151	45.2	1	c15orf41_NM_001016489_+_scaffold_37:2851946-2999220@INTRON_8,
scaffold_383:526880-654370	scaffold_383:574330-574430	101	44.8	1	kiaa0895_NM_001114073_-_scaffold_383:120263-654575@INTRON_5,
scaffold_496:743434-746435	scaffold_496:745734-745884	151	44.8	1	ndrg1_NM_001008145_-_scaffold_496:742610-773801@INTRON_1,
scaffold_769:84173-87234	scaffold_769:86623-86773	151	44.7	1	derl1_NM_001016723_-_scaffold_769:76078-87449@INTRON_7,
scaffold_788:37498-55015	scaffold_788:53098-53248	151	44.3	1	hsd17b13_NM_001011240_+_scaffold_788:37261-65063@INTRON_1,
scaffold_86:2135901-2138466	scaffold_86:2137351-2137501	151	44.2	1	jak2_NM_001097165_-_scaffold_86:2104825-2188600@INTRON_18,
scaffold_883:148317-238526	scaffold_883:226317-226467	151	43.5	1	MGC69309_NM_001004837_-_scaffold_883:1552-247279@INTRON_3,
scaffold_486:672807-701335	scaffold_486:688357-688457	101	43.2	1	ralgapa2_NM_001126826_+_scaffold_486:672405-846155@INTRON_1,
scaffold_30:4108110-4125308	scaffold_30:4115210-4115360	151	42.9	1	imp3_NM_001004848_+_scaffold_30:4088087-4126240@INTRON_3,
scaffold_67:580546-588871	scaffold_67:585046-585196	151	42.8	1	b4galnt1_NM_001126696_-_scaffold_67:561404-643222@INTRON_11,
scaffold_383:526880-654370	scaffold_383:575080-575230	151	42.6	1	kiaa0895_NM_001114073_-_scaffold_383:120263-654575@INTRON_5,
scaffold_346:445974-451450	scaffold_346:446774-446924	151	42.4	1	cenpn_NM_001011097_-_scaffold_346:443163-458035@INTRON_3,
scaffold_470:869005-871480	scaffold_470:870155-870355	201	42.3	1	dnajc27_NM_001102684_-_scaffold_470:859879-916357@INTRON_13,
scaffold_429:76091-111947	scaffold_429:79391-79541	151	42.2	1	sox13_NM_001017004_-_scaffold_429:14899-129409@INTRON_13,
scaffold_291:436482-444932	scaffold_291:442232-442482	251	42.1	1	dnajb11_NM_203849_-_scaffold_291:409790-496794@INTRON_3,
scaffold_821:204483-242773	scaffold_821:225433-225633	201	41.8	1	igsf21_NM_001078772_+_scaffold_821:153666-249814@INTRON_3,
scaffold_705:68984-78518	scaffold_705:78034-78384	351	41.6	1	gfra1_NM_001103085_+_scaffold_705:24269-100900@INTRON_4,
scaffold_34:2891058-3302201	scaffold_34:3068808-3068958	151	41.5	1	sirt4_NM_001045628_-_scaffold_34:2890969-3918895@INTRON_1,
scaffold_531:292514-300658	scaffold_531:299914-300164	251	41.5	1	cdh4_NM_001123479_+_scaffold_531:254909-315461@INTRON_5,
scaffold_7:709771-933535	scaffold_7:910271-910421	151	41.3	1	myo15a_NM_001100245_+_scaffold_7:41322-933681@INTRON_2,
scaffold_950:174249-181062	scaffold_950:180049-180499	451	40.9	1	ctr9_NM_001005076_-_scaffold_950:165206-181510@INTRON_19,
scaffold_120:1540113-1567789	scaffold_120:1542913-1543113	201	40.8	1	cdh13_NM_001103078_+_scaffold_120:1104798-1600265@INTRON_10,
scaffold_544:658195-662538	scaffold_544:661595-661895	301	40.8	1	nav2_NM_001128641_-_scaffold_544:595428-773120@INTRON_28,
scaffold_714:145969-168358	scaffold_714:157219-157319	101	40.8	1	vcl_NM_001097253_-_scaffold_714:77526-187403@INTRON_19,
scaffold_222:670658-787944	scaffold_222:676908-677008	101	40.6	1	begain_NM_001113026_+_scaffold_222:585058-874492@INTRON_3,
scaffold_383:155023-383367	scaffold_383:306023-306173	151	40.5	1	kiaa0895_NM_001114073_-_scaffold_383:120263-654575@INTRON_2,
scaffold_494:45534-46404	scaffold_494:45734-45984	251	40.2	1	acsl5_NM_001011069_+_scaffold_494:27687-55015@INTRON_11,
scaffold_544:636556-674795	scaffold_544:661606-661906	301	40.2	1	nav2_NM_001128641_-_scaffold_544:636432-674911@INTRON_1,
scaffold_106:1680115-2016415	scaffold_106:1887965-1888115	151	40	1	slc39a3_NM_001102697_-_scaffold_106:83848-2455684@INTRON_10,
scaffold_228:517760-524087	scaffold_228:522710-522860	151	39.9	1	sec11c_NM_001005129_+_scaffold_228:498518-526156@INTRON_4,
scaffold_372:692163-715096	scaffold_372:706313-706613	301	39.8	1	bre_NM_001005716_-_scaffold_372:654071-768278@INTRON_4,
scaffold_51:1345990-1489429	scaffold_51:1376340-1376490	151	39.7	1	rbms1_NM_001097163_+_scaffold_51:1345884-1559954@INTRON_1,
scaffold_45:2544039-2599922	scaffold_45:2579289-2579389	101	39.5	1	srpk3_NM_001102962_-_scaffold_45:2491207-2600208@INTRON_13,
scaffold_281:579862-617015	scaffold_281:582262-582462	201	39.5	1	tspan18_NM_001100203_-_scaffold_281:576840-648915@INTRON_7,
scaffold_274:747565-788753	scaffold_274:763615-763715	101	39.4	1	myo15a_NM_001100245_-_scaffold_274:633077-789049@INTRON_5,
scaffold_161:717069-727734	scaffold_161:722619-722769	151	39.3	1	slc48a1_NM_001015946_+_scaffold_161:716812-730688@INTRON_1,
scaffold_531:465848-558172	scaffold_531:500098-500348	251	39.2	1	cables2_NM_001114489_-_scaffold_531:58890-703245@INTRON_2,
scaffold_674:141324-145775	scaffold_674:143674-143774	101	39.2	1	trip13_NM_203897_-_scaffold_674:133140-165885@INTRON_3,
scaffold_36:307489-311465	scaffold_36:308239-308389	151	39.1	1	LOC100145209_NM_001126697_+_scaffold_36:295717-331699@INTRON_9,
scaffold_531:59534-465760	scaffold_531:299934-300184	251	39	1	cables2_NM_001114489_-_scaffold_531:58890-703245@INTRON_1,
scaffold_726:318803-425692	scaffold_726:338903-339103	201	39	1	lsamp_NM_001102915_+_scaffold_726:95608-448976@INTRON_3,
scaffold_7:4365979-4415251	scaffold_7:4397829-4397929	101	38.9	1	tnfaip8_NM_001017184_-_scaffold_7:4364575-4415406@INTRON_1,
scaffold_413:652718-720114	scaffold_413:699668-699918	251	38.9	1	galnt14_NM_001078901_+_scaffold_413:536416-769069@INTRON_2,
scaffold_143:724197-1045561	scaffold_143:874747-874847	101	38.8	1	myo15a_NM_001100245_-_scaffold_143:88388-1680404@INTRON_5,
scaffold_189:1189021-1195351	scaffold_189:1189721-1189921	201	38.7	1	clvs1_NM_001097346_+_scaffold_189:1171996-1208931@INTRON_3,
scaffold_446:730870-943514	scaffold_446:878420-878570	151	38.6	1	bin1_NM_203900_-_scaffold_446:399955-972588@INTRON_2,
scaffold_531:499490-506101	scaffold_531:500090-500340	251	38.6	1	osbpl2_NM_205832_+_scaffold_531:499444-531362@INTRON_1,
scaffold_821:204483-242773	scaffold_821:225183-225383	201	38.6	1	igsf21_NM_001078772_+_scaffold_821:153666-249814@INTRON_3,
scaffold_65:1831410-1935213	scaffold_65:1922760-1922910	151	38.4	1	c16orf45_NM_001142078_-_scaffold_65:1491901-1935285@INTRON_4,
scaffold_99:2546112-2586847	scaffold_99:2583312-2583412	101	38.2	1	trappc9_NM_001142140_+_scaffold_99:2445087-2719495@INTRON_18,
scaffold_638:629487-640677	scaffold_638:638637-639037	401	38.2	1	il11ra_NM_001100282_+_scaffold_638:600838-649952@INTRON_6,
scaffold_41:3269845-3283209	scaffold_41:3280645-3280795	151	38.1	1	dcaf6_NM_001079565_-_scaffold_41:3229866-3313374@INTRON_11,
scaffold_45:2544039-2599922	scaffold_45:2580339-2580439	101	38.1	1	srpk3_NM_001102962_-_scaffold_45:2491207-2600208@INTRON_13,
scaffold_7:709771-933535	scaffold_7:910571-910721	151	38	1	myo15a_NM_001100245_+_scaffold_7:41322-933681@INTRON_2,
scaffold_255:1149404-1520158	scaffold_255:1230454-1230754	301	38	1	tbxas1_NM_001171526_-_scaffold_255:1149227-1520937@INTRON_1,
scaffold_298:165134-168579	scaffold_298:165284-165384	101	38	1	mthfr_NM_001102994_-_scaffold_298:158016-187627@INTRON_6,
scaffold_104:2318438-2441304	scaffold_104:2426588-2426688	101	37.7	1	gatad1_NM_001170506_+_scaffold_104:1889170-2441351@INTRON_12,
scaffold_127:104512-248490	scaffold_127:106662-106762	101	37.7	1	celf4_NM_001078910_-_scaffold_127:7653-738884@INTRON_10,
scaffold_1093:47798-64521	scaffold_1093:61598-61748	151	37.5	1	cdh26_NM_001030513_-_scaffold_1093:43215-64596@INTRON_7,
scaffold_15:975979-995664	scaffold_15:990629-990779	151	37.4	1	ypel2_NM_001102689_+_scaffold_15:538211-995952@INTRON_8,
scaffold_667:404698-571763	scaffold_667:405648-405848	201	37.4	1	bin1_NM_203900_+_scaffold_667:401087-571869@INTRON_1,
scaffold_716:276701-298877	scaffold_716:279351-279451	101	37.4	1	c9orf5_NM_001102907_-_scaffold_716:152737-299558@INTRON_9,
scaffold_191:398900-692537	scaffold_191:621900-622150	251	37.2	1	tulp3_NM_001123481_-_scaffold_191:255556-1465506@INTRON_2,
scaffold_413:741851-745692	scaffold_413:744001-744251	251	37.2	1	galnt14_NM_001078901_+_scaffold_413:536416-769069@INTRON_5,
scaffold_1284:57929-63302	scaffold_1284:58779-58979	201	37.2	1	col9a3_NM_001127025_-_scaffold_1284:46862-81604@INTRON_21,
scaffold_49:2111848-2125819	scaffold_49:2121998-2122098	101	37.1	1	tdp1_NM_001045777_+_scaffold_49:2080504-2136466@INTRON_14,
scaffold_103:88126-90199	scaffold_103:88376-88526	151	37.1	1	ccdc33_NM_001126682_+_scaffold_103:72847-100276@INTRON_5,
scaffold_106:1680115-2016415	scaffold_106:2011215-2011365	151	37.1	1	slc39a3_NM_001102697_-_scaffold_106:83848-2455684@INTRON_10,
scaffold_281:579862-617015	scaffold_281:612212-612362	151	37	1	tspan18_NM_001100203_-_scaffold_281:576840-648915@INTRON_7,
scaffold_576:91153-94345	scaffold_576:92003-92153	151	37	1	polr3b_NM_001128049_-_scaffold_576:36983-104720@INTRON_22,
scaffold_422:108546-193707	scaffold_422:154796-154896	101	36.9	1	poll_NM_001100246_+_scaffold_422:108459-193789@INTRON_1,
scaffold_1390:7597-44059	scaffold_1390:28347-28597	251	36.9	1	kiaa1045_NM_001079022_-_scaffold_1390:7193-44317@INTRON_1,
scaffold_753:21921-338290	scaffold_753:68521-68621	101	36.8	1	sult1c4_NM_001011489_+_scaffold_753:3319-338385@INTRON_10,
scaffold_966:72041-107857	scaffold_966:74391-74541	151	36.7	1	fastkd3_NM_001142147_+_scaffold_966:71912-241109@INTRON_1,
scaffold_49:2111848-2125819	scaffold_49:2122198-2122298	101	36.6	1	tdp1_NM_001045777_+_scaffold_49:2080504-2136466@INTRON_14,
scaffold_106:1292561-1303894	scaffold_106:1301161-1301311	151	36.6	1	gbp2_NM_001078799_-_scaffold_106:1290822-1305864@INTRON_2,
scaffold_34:2508570-2509686	scaffold_34:2508870-2509020	151	36.5	1	ppapdc1b_NM_001128006_+_scaffold_34:2503227-2512205@INTRON_7,
scaffold_278:912053-922109	scaffold_278:921303-921453	151	36.5	1	rnf130_NM_001114240_-_scaffold_278:878287-988809@INTRON_6,
scaffold_714:168429-186708	scaffold_714:184079-184179	101	36.5	1	vcl_NM_001097253_-_scaffold_714:77526-187403@INTRON_20,
scaffold_789:309157-332930	scaffold_789:316657-316957	301	36.5	1	zc3h3_NM_001044484_+_scaffold_789:305023-394708@INTRON_3,
scaffold_789:312256-393729	scaffold_789:316656-316956	301	36.5	1	zc3h3_NM_001044484_+_scaffold_789:312056-393959@INTRON_1,
scaffold_88:1001893-1009057	scaffold_88:1006543-1006693	151	36.4	1	LOC100170434_NM_001130208_-_scaffold_88:994366-1009087@INTRON_3,
scaffold_34:3556578-3918839	scaffold_34:3818228-3818328	101	36.2	1	sirt4_NM_001045628_-_scaffold_34:2890969-3918895@INTRON_6,
scaffold_930:212006-212584	scaffold_930:212106-212556	451	36.2	1	aldh4a1_NM_001102714_-_scaffold_930:205585-215646@INTRON_5,
scaffold_208:1543803-1553385	scaffold_208:1546053-1546153	101	36.1	1	cdk15_NM_001079451_+_scaffold_208:1543775-1640899@INTRON_1,
scaffold_425:790058-795606	scaffold_425:793808-793908	101	36.1	1	tgfbr1_NM_001015961_+_scaffold_425:754250-806388@INTRON_5,
scaffold_1126:198572-205548	scaffold_1126:204572-204722	151	36.1	1	sox5_NM_001128658_+_scaffold_1126:56803-218005@INTRON_4,
scaffold_52:3220538-3231146	scaffold_52:3226138-3226688	551	36	1	dgkb_NM_001102744_+_scaffold_52:3184081-3450535@INTRON_2,
scaffold_667:404662-468120	scaffold_667:405662-405862	201	36	1	bin1_NM_203900_+_scaffold_667:185672-468547@INTRON_3,
scaffold_106:919420-1309606	scaffold_106:1301170-1301320	151	35.9	1	slc39a3_NM_001102697_-_scaffold_106:83848-2455684@INTRON_7,
scaffold_45:2147648-2160134	scaffold_45:2150748-2150898	151	35.8	1	reln_NM_001137612_-_scaffold_45:2010419-2256264@INTRON_59,
scaffold_129:1091831-1149497	scaffold_129:1148931-1149031	101	35.8	1	LOC779492_NM_001134807_-_scaffold_129:1091726-1149729@INTRON_1,
scaffold_256:1526020-1529810	scaffold_256:1528470-1528670	201	35.8	1	sptlc1_NM_001079574_-_scaffold_256:1493908-1529878@INTRON_14,
scaffold_281:617063-648666	scaffold_281:635913-636013	101	35.8	1	tspan18_NM_001100203_-_scaffold_281:576840-648915@INTRON_8,
scaffold_409:599075-842329	scaffold_409:611325-611425	101	35.8	1	LOC100492947_NM_001195230_+_scaffold_409:598989-842684@INTRON_2,
scaffold_45:2544039-2599922	scaffold_45:2579989-2580139	151	35.7	1	srpk3_NM_001102962_-_scaffold_45:2491207-2600208@INTRON_13,
scaffold_178:1083569-1084964	scaffold_178:1084069-1084219	151	35.7	1	abcc3_NM_001113829_-_scaffold_178:1068155-1113350@INTRON_16,
scaffold_1266:62686-100512	scaffold_1266:68786-68936	151	35.7	1	lmna_NM_001045683_-_scaffold_1266:52176-100903@INTRON_11,
scaffold_1:5149843-5157433	scaffold_1:5154143-5154243	101	35.6	1	eps15_NM_001126628_-_scaffold_1:5133025-5179773@INTRON_13,
scaffold_531:59534-465760	scaffold_531:211434-211634	201	35.6	1	cables2_NM_001114489_-_scaffold_531:58890-703245@INTRON_1,
scaffold_387:563893-588147	scaffold_387:576993-577193	201	35.5	1	ifngr1_NM_001079346_+_scaffold_387:526819-603105@INTRON_3,
scaffold_255:1149404-1520158	scaffold_255:1227054-1227254	201	35.4	1	tbxas1_NM_001171526_-_scaffold_255:1149227-1520937@INTRON_1,
scaffold_531:59534-465760	scaffold_531:117934-118034	101	35.4	1	cables2_NM_001114489_-_scaffold_531:58890-703245@INTRON_1,
scaffold_413:652718-720114	scaffold_413:700968-701218	251	35.3	1	galnt14_NM_001078901_+_scaffold_413:536416-769069@INTRON_2,
scaffold_1585:16235-17009	scaffold_1585:16585-16935	351	35.3	1	sema4a_NM_001113839_+_scaffold_1585:12059-24227@INTRON_3,
scaffold_86:2135901-2138466	scaffold_86:2136751-2136851	101	35.2	1	jak2_NM_001097165_-_scaffold_86:2104825-2188600@INTRON_18,
scaffold_413:764598-767857	scaffold_413:767398-767648	251	35.2	1	galnt14_NM_001078901_+_scaffold_413:536416-769069@INTRON_13,
scaffold_137:1345546-1622175	scaffold_137:1491946-1492096	151	34.9	1	bin1_NM_203900_+_scaffold_137:795532-2340846@INTRON_2,
scaffold_343:448518-496568	scaffold_343:490318-490418	101	34.8	1	ccni_NM_001005690_+_scaffold_343:432412-503101@INTRON_2,
scaffold_651:851-29915	scaffold_651:11451-11601	151	34.8	1	dync1i1_NM_001112911_-_scaffold_651:708-155818@INTRON_1,
scaffold_35:880734-885378	scaffold_35:883284-883384	101	34.7	1	cask_NM_001016204_+_scaffold_35:738621-911918@INTRON_20,
scaffold_161:1414303-1416490	scaffold_161:1416053-1416203	151	34.7	1	LOC100145274_NM_001126753_+_scaffold_161:1413911-1429014@INTRON_2,
scaffold_667:404698-571763	scaffold_667:411198-411348	151	34.7	1	bin1_NM_203900_+_scaffold_667:401087-571869@INTRON_1,
scaffold_777:125171-136599	scaffold_777:127071-127271	201	34.7	1	kiaa1797_NM_001016255_-_scaffold_777:116299-137132@INTRON_4,
scaffold_836:205592-214725	scaffold_836:210842-211042	201	34.6	1	susd3_NM_001113892_-_scaffold_836:198033-215032@INTRON_4,
scaffold_221:1389617-1396906	scaffold_221:1395817-1395917	101	34.5	1	galk2_NM_001005803_+_scaffold_221:1330600-1406144@INTRON_8,
scaffold_291:1081453-1101974	scaffold_291:1097703-1097853	151	34.5	1	tmeff2_NM_001097223_+_scaffold_291:1081209-1292027@INTRON_1,
scaffold_310:84678-113013	scaffold_310:92228-92328	101	34.5	1	c16orf45_NM_001142078_-_scaffold_310:64664-177421@INTRON_5,
scaffold_140:1174760-1196345	scaffold_140:1177210-1177360	151	34.3	1	tmeff1_NM_001100268_+_scaffold_140:1093531-1225056@INTRON_5,
scaffold_366:1008751-1031220	scaffold_366:1009351-1009501	151	34.3	1	slc47a2_NM_001102970_+_scaffold_366:1008257-1039407@INTRON_1,
scaffold_821:194449-204011	scaffold_821:200199-200399	201	34.3	1	igsf21_NM_001078772_+_scaffold_821:153666-249814@INTRON_2,
scaffold_1143:53888-61980	scaffold_1143:57188-57388	201	34.3	1	ccdc147_NM_001126070_-_scaffold_1143:52556-94537@INTRON_3,
scaffold_55:106195-116822	scaffold_55:108545-108645	101	34.2	1	atp1b3_NM_203756_-_scaffold_55:99022-117024@INTRON_6,
scaffold_92:201746-319680	scaffold_92:281846-281996	151	34.2	1	cdkn2d_NM_001079371_-_scaffold_92:201270-320889@INTRON_3,
scaffold_140:327864-363501	scaffold_140:328864-328964	101	34.2	1	gabbr2_NM_001016007_+_scaffold_140:100515-451999@INTRON_8,
scaffold_379:282195-327838	scaffold_379:314945-315045	101	34.2	1	unc93b1_NM_001100253_-_scaffold_379:255521-338606@INTRON_10,
scaffold_470:660034-740367	scaffold_470:660234-660434	201	34.2	1	ncoa1_NM_001112912_+_scaffold_470:615956-838333@INTRON_2,
scaffold_77:2789293-2790085	scaffold_77:2789743-2789893	151	34.1	1	ptprn_NM_001127959_+_scaffold_77:2776726-2810404@INTRON_6,
scaffold_95:2187255-2290652	scaffold_95:2232855-2233005	151	34.1	1	tmem132d_NM_001113104_+_scaffold_95:2100100-2543069@INTRON_3,
scaffold_232:1467733-1504098	scaffold_232:1497083-1497183	101	34.1	1	gtdc1_NM_001007983_+_scaffold_232:1425988-1565344@INTRON_4,
scaffold_692:240198-451961	scaffold_692:406748-406998	251	34.1	1	pias3_NM_001123418_-_scaffold_692:230800-452421@INTRON_4,
scaffold_821:204483-242773	scaffold_821:217133-217383	251	34.1	1	igsf21_NM_001078772_+_scaffold_821:153666-249814@INTRON_3,
scaffold_163:1548645-2043961	scaffold_163:2018945-2019095	151	34	1	spon2_NM_001079092_-_scaffold_163:1547842-2044068@INTRON_1,
scaffold_255:1149404-1520158	scaffold_255:1202354-1202604	251	34	1	tbxas1_NM_001171526_-_scaffold_255:1149227-1520937@INTRON_1,
scaffold_650:243690-272419	scaffold_650:244840-244990	151	34	1	aplp1_NM_001127434_+_scaffold_650:243440-395456@INTRON_1,
scaffold_446:730870-943514	scaffold_446:821070-821270	201	33.9	1	bin1_NM_203900_-_scaffold_446:399955-972588@INTRON_2,
scaffold_16:1547869-1803167	scaffold_16:1578969-1579069	101	33.8	1	ypel2_NM_001102689_+_scaffold_16:1547739-2300995@INTRON_1,
scaffold_43:2732754-3005984	scaffold_43:3004654-3004754	101	33.8	1	mitf_NM_001100277_-_scaffold_43:2684980-3006141@INTRON_3,
scaffold_446:730870-943514	scaffold_446:878920-879070	151	33.8	1	bin1_NM_203900_-_scaffold_446:399955-972588@INTRON_2,
scaffold_531:59534-465760	scaffold_531:225534-225734	201	33.8	1	cables2_NM_001114489_-_scaffold_531:58890-703245@INTRON_1,
scaffold_79:812233-1375476	scaffold_79:1306033-1306133	101	33.7	1	slc39a3_NM_001102697_+_scaffold_79:680766-2284175@INTRON_2,
scaffold_106:1858895-1892268	scaffold_106:1887945-1888145	201	33.7	1	rps6ka1_NM_001123459_+_scaffold_106:1858848-1919668@INTRON_1,
scaffold_127:248539-561605	scaffold_127:384439-384539	101	33.7	1	celf4_NM_001078910_-_scaffold_127:7653-738884@INTRON_11,
scaffold_281:579862-617015	scaffold_281:582512-582662	151	33.7	1	tspan18_NM_001100203_-_scaffold_281:576840-648915@INTRON_7,
scaffold_650:282858-395124	scaffold_650:308208-308408	201	33.7	1	aplp1_NM_001127434_+_scaffold_650:243440-395456@INTRON_13,
scaffold_1480:3409-10502	scaffold_1480:10209-10359	151	33.7	1	pkp2_NM_001102842_+_scaffold_1480:3117-37243@INTRON_1,
scaffold_466:471448-491205	scaffold_466:481148-481298	151	33.6	1	c17orf103_NM_001008089_-_scaffold_466:469816-517507@INTRON_1,
scaffold_28:2616895-3006158	scaffold_28:2700045-2700195	151	33.5	1	dpp6_NM_001102992_+_scaffold_28:2616243-3245700@INTRON_1,
scaffold_99:2717733-2718407	scaffold_99:2717783-2717933	151	33.5	1	trappc9_NM_001142140_+_scaffold_99:2445087-2719495@INTRON_21,
scaffold_127:248539-561605	scaffold_127:274289-274389	101	33.4	1	celf4_NM_001078910_-_scaffold_127:7653-738884@INTRON_11,
scaffold_531:562827-563875	scaffold_531:563527-563627	101	33.4	1	lama5_NM_001127133_-_scaffold_531:561686-615992@INTRON_3,
scaffold_650:282858-395124	scaffold_650:369808-370008	201	33.4	1	aplp1_NM_001127434_+_scaffold_650:243440-395456@INTRON_13,
scaffold_9:2310906-3030103	scaffold_9:2989056-2989156	101	33.3	1	cadm2_NM_001005713_+_scaffold_9:2310496-3241766@INTRON_1,
scaffold_105:2616215-2619010	scaffold_105:2617315-2617415	101	33.3	1	mettl5_NM_001030492_+_scaffold_105:2615859-2624024@INTRON_2,
scaffold_68:2684851-2714697	scaffold_68:2700751-2700851	101	33.2	1	rtn1_NM_001085350_-_scaffold_68:2677137-2762253@INTRON_6,
scaffold_413:652718-720114	scaffold_413:717068-717218	151	33.2	1	galnt14_NM_001078901_+_scaffold_413:536416-769069@INTRON_2,
scaffold_893:53598-57198	scaffold_893:53948-54098	151	33.2	1	sox18_NM_001129937_-_scaffold_893:52481-57520@INTRON_1,
scaffold_23:1187538-1188795	scaffold_23:1188338-1188438	101	33.1	1	kiaa1524_NM_001142038_+_scaffold_23:1163024-1191457@INTRON_18,
scaffold_23:2872158-2874466	scaffold_23:2873808-2873958	151	33.1	1	derl2_NM_001016097_-_scaffold_23:2871714-2880732@INTRON_1,
scaffold_46:2907904-3168175	scaffold_46:2939304-2939454	151	33.1	1	arsd_NM_001015952_+_scaffold_46:2907883-3233990@INTRON_1,
scaffold_106:1309953-1679816	scaffold_106:1600203-1600303	101	33.1	1	slc39a3_NM_001102697_-_scaffold_106:83848-2455684@INTRON_9,
scaffold_255:499140-523315	scaffold_255:514040-514190	151	33.1	1	gas7_NM_001127048_+_scaffold_255:470544-531011@INTRON_3,
scaffold_531:591297-611711	scaffold_531:598147-598297	151	33.1	1	lama5_NM_001127133_-_scaffold_531:561686-615992@INTRON_54,
scaffold_67:580546-588871	scaffold_67:587596-587746	151	33	1	b4galnt1_NM_001126696_-_scaffold_67:561404-643222@INTRON_11,
scaffold_95:1171653-1176780	scaffold_95:1175103-1175253	151	33	1	kiaa1468_NM_001127054_+_scaffold_95:1150323-1232953@INTRON_3,
scaffold_127:104512-248490	scaffold_127:178412-178562	151	33	1	celf4_NM_001078910_-_scaffold_127:7653-738884@INTRON_10,
scaffold_127:104512-248490	scaffold_127:197362-197462	101	33	1	celf4_NM_001078910_-_scaffold_127:7653-738884@INTRON_10,
scaffold_156:1978012-1981170	scaffold_156:1979812-1979962	151	33	1	cwc15_NM_001078733_-_scaffold_156:1973584-1982300@INTRON_5,
scaffold_95:1171653-1176780	scaffold_95:1175453-1175553	101	32.9	1	kiaa1468_NM_001127054_+_scaffold_95:1150323-1232953@INTRON_3,
scaffold_137:2036508-2351066	scaffold_137:2119258-2119358	101	32.9	1	sox18_NM_001129937_+_scaffold_137:1651945-2351448@INTRON_3,
scaffold_529:837368-841752	scaffold_529:840018-840118	101	32.9	1	rnf126_NM_001006734_-_scaffold_529:820829-841946@INTRON_6,
scaffold_692:158426-159500	scaffold_692:158826-159126	301	32.9	1	fstl1_NM_001045756_+_scaffold_692:158105-170153@INTRON_2,
scaffold_5:3792938-3871523	scaffold_5:3833688-3833838	151	32.8	1	trio_NM_001129921_+_scaffold_5:3792720-4075738@INTRON_1,
scaffold_578:571597-667011	scaffold_578:642447-642547	101	32.8	1	LOC733855_NM_001045601_+_scaffold_578:490506-667922@INTRON_4,
scaffold_44:3276171-3380580	scaffold_44:3316771-3316921	151	32.7	1	tpra1_NM_001130334_+_scaffold_44:3253659-3384012@INTRON_11,
scaffold_115:763332-764598	scaffold_115:763882-764132	251	32.7	1	c6orf167_NM_001128044_+_scaffold_115:728644-770275@INTRON_16,
scaffold_127:74906-104432	scaffold_127:84906-85006	101	32.7	1	celf4_NM_001078910_-_scaffold_127:7653-738884@INTRON_9,
scaffold_191:692648-913984	scaffold_191:901248-901348	101	32.7	1	tulp3_NM_001123481_-_scaffold_191:255556-1465506@INTRON_3,
scaffold_218:202413-212521	scaffold_218:210213-210313	101	32.7	1	casp10_NM_001015715_-_scaffold_218:191804-225457@INTRON_7,
scaffold_808:38407-110132	scaffold_808:73757-73857	101	32.7	1	LOC100127658_NM_001113002_+_scaffold_808:36610-110268@INTRON_2,
scaffold_917:96153-113230	scaffold_917:99503-99853	351	32.7	1	LOC100145466_NM_001126918_+_scaffold_917:91434-119111@INTRON_3,
scaffold_97:506209-512721	scaffold_97:509009-509109	101	32.6	1	wdr7_NM_001097268_-_scaffold_97:326050-536829@INTRON_15,
scaffold_127:248539-561605	scaffold_127:273539-273689	151	32.6	1	celf4_NM_001078910_-_scaffold_127:7653-738884@INTRON_11,
scaffold_917:96153-113230	scaffold_917:108053-108153	101	32.6	1	LOC100145466_NM_001126918_+_scaffold_917:91434-119111@INTRON_3,
scaffold_446:400203-730662	scaffold_446:532803-532953	151	32.5	1	bin1_NM_203900_-_scaffold_446:399955-972588@INTRON_1,
scaffold_480:58084-72342	scaffold_480:59084-59234	151	32.5	1	snd1_NM_203852_-_scaffold_480:49665-420331@INTRON_4,
scaffold_529:837368-841752	scaffold_529:840168-840268	101	32.5	1	rnf126_NM_001006734_-_scaffold_529:820829-841946@INTRON_6,
scaffold_104:2318438-2441304	scaffold_104:2426338-2426438	101	32.4	1	gatad1_NM_001170506_+_scaffold_104:1889170-2441351@INTRON_12,
scaffold_137:1701617-2340456	scaffold_137:2119267-2119367	101	32.4	1	bin1_NM_203900_+_scaffold_137:795532-2340846@INTRON_5,
scaffold_143:724197-1045561	scaffold_143:883197-883297	101	32.4	1	myo15a_NM_001100245_-_scaffold_143:88388-1680404@INTRON_5,
scaffold_165:783882-836397	scaffold_165:828582-828782	201	32.4	1	ssbp2_NM_001142090_+_scaffold_165:777568-853910@INTRON_3,
scaffold_726:95689-262505	scaffold_726:141589-141739	151	32.4	1	lsamp_NM_001102915_+_scaffold_726:95608-448976@INTRON_1,
scaffold_982:53654-56689	scaffold_982:55904-56004	101	32.4	1	znf300_NM_001016118_+_scaffold_982:52021-73563@INTRON_2,
scaffold_1124:1837-13677	scaffold_1124:6837-6987	151	32.4	1	st5_NM_001142075_+_scaffold_1124:747-35127@INTRON_1,
scaffold_1327:49036-85298	scaffold_1327:54286-54436	151	32.4	1	cntfr_NM_001114251_+_scaffold_1327:33250-93039@INTRON_2,
scaffold_1390:7597-44059	scaffold_1390:17597-17747	151	32.4	1	kiaa1045_NM_001079022_-_scaffold_1390:7193-44317@INTRON_1,
scaffold_1759:6497-11412	scaffold_1759:10897-11047	151	32.4	1	celf3_NM_001016491_+_scaffold_1759:6012-45014@INTRON_1,
scaffold_178:1081549-1082649	scaffold_178:1081699-1081899	201	32.3	1	abcc3_NM_001113829_-_scaffold_178:1068155-1113350@INTRON_13,
scaffold_288:1134882-1167955	scaffold_288:1162482-1162632	151	32.3	1	LOC100145527_NM_001126967_-_scaffold_288:1112342-1189439@INTRON_7,
scaffold_313:164679-293220	scaffold_313:240279-240379	101	32.3	1	lcp2_NM_001128017_-_scaffold_313:164515-603941@INTRON_1,
scaffold_413:652718-720114	scaffold_413:701518-701668	151	32.3	1	galnt14_NM_001078901_+_scaffold_413:536416-769069@INTRON_2,
scaffold_531:59534-465760	scaffold_531:231834-231934	101	32.3	1	cables2_NM_001114489_-_scaffold_531:58890-703245@INTRON_1,
scaffold_531:577710-702863	scaffold_531:600310-600410	101	32.3	1	cables2_NM_001114489_-_scaffold_531:58890-703245@INTRON_4,
scaffold_2:496380-509798	scaffold_2:498930-499080	151	32.2	1	itgav_NM_001123449_+_scaffold_2:457190-644980@INTRON_4,
scaffold_4:759869-777718	scaffold_4:770969-771169	201	32.2	1	st3gal3_NM_204095_-_scaffold_4:749128-873359@INTRON_3,
scaffold_106:84779-503722	scaffold_106:358779-358879	101	32.2	1	slc39a3_NM_001102697_-_scaffold_106:83848-2455684@INTRON_4,
scaffold_188:712226-787198	scaffold_188:749076-749176	101	32.2	1	banp_NM_203864_-_scaffold_188:703445-903409@INTRON_2,
scaffold_281:617063-648666	scaffold_281:635813-635913	101	32.2	1	tspan18_NM_001100203_-_scaffold_281:576840-648915@INTRON_8,
scaffold_494:873269-878990	scaffold_494:873469-873619	151	32.2	1	pias3_NM_001123418_-_scaffold_494:861733-879149@INTRON_13,
scaffold_534:499613-537276	scaffold_534:512063-512163	101	32.2	1	slc7a6os_NM_001044467_+_scaffold_534:491559-537532@INTRON_4,
scaffold_13:3160394-3254301	scaffold_13:3231994-3232144	151	32.1	1	dach1_NM_001078708_+_scaffold_13:3159588-3365066@INTRON_1,
scaffold_77:2788143-2788971	scaffold_77:2788493-2788593	101	32.1	1	ptprn_NM_001127959_+_scaffold_77:2776726-2810404@INTRON_5,
scaffold_106:1587520-1602002	scaffold_106:1600220-1600320	101	32.1	1	ccdc21_NM_001126536_+_scaffold_106:1570291-1602473@INTRON_8,
scaffold_416:139116-152788	scaffold_416:151466-151616	151	32.1	1	tmem63c_NM_001097199_+_scaffold_416:139054-189200@INTRON_1,
scaffold_34:2891058-3302201	scaffold_34:3267108-3267208	101	32	1	sirt4_NM_001045628_-_scaffold_34:2890969-3918895@INTRON_1,
scaffold_43:2732754-3005984	scaffold_43:2922804-2922954	151	32	1	mitf_NM_001100277_-_scaffold_43:2684980-3006141@INTRON_3,
scaffold_127:248539-561605	scaffold_127:394889-395089	201	32	1	celf4_NM_001078910_-_scaffold_127:7653-738884@INTRON_11,
scaffold_179:484051-490474	scaffold_179:487201-487301	101	32	1	ascc1_NM_001102901_-_scaffold_179:426723-547510@INTRON_3,
scaffold_470:740467-753456	scaffold_470:752067-752167	101	32	1	ncoa1_NM_001112912_+_scaffold_470:615956-838333@INTRON_3,
scaffold_531:558198-577497	scaffold_531:563498-563598	101	32	1	cables2_NM_001114489_-_scaffold_531:58890-703245@INTRON_3,
scaffold_539:400714-696958	scaffold_539:483914-484014	101	32	1	trac_NM_001007866_+_scaffold_539:367901-704473@INTRON_4,
scaffold_1026:150039-190470	scaffold_1026:152089-152189	101	32	1	LOC100145501_NM_001126945_-_scaffold_1026:138540-191557@INTRON_10,
scaffold_301:598065-609380	scaffold_301:606215-606315	101	31.9	1	ptprs_NM_001141992_+_scaffold_301:463997-609567@INTRON_10,
scaffold_346:445974-451450	scaffold_346:449324-449424	101	31.9	1	cenpn_NM_001011097_-_scaffold_346:443163-458035@INTRON_3,
scaffold_54:2615370-2620971	scaffold_54:2618270-2618370	101	31.8	1	nek1_NM_001097211_+_scaffold_54:2604934-2662148@INTRON_8,
scaffold_86:905441-1079654	scaffold_86:1036091-1036191	101	31.8	1	ptprd_NM_001126889_+_scaffold_86:472567-1283803@INTRON_7,
scaffold_113:2086255-2114052	scaffold_113:2099055-2099155	101	31.8	1	polk_NM_001005705_+_scaffold_113:2086166-2138791@INTRON_1,
scaffold_280:20743-22103	scaffold_280:21293-21443	151	31.8	1	ptcd3_NM_001078697_+_scaffold_280:20116-34652@INTRON_2,
scaffold_667:404662-468120	scaffold_667:411212-411362	151	31.8	1	bin1_NM_203900_+_scaffold_667:185672-468547@INTRON_3,
scaffold_1093:140140-160950	scaffold_1093:146640-146890	251	31.8	1	phactr3_NM_001100199_-_scaffold_1093:132174-167320@INTRON_5,
scaffold_127:104512-248490	scaffold_127:178212-178312	101	31.7	1	celf4_NM_001078910_-_scaffold_127:7653-738884@INTRON_10,
scaffold_413:849267-850624	scaffold_413:849717-849867	151	31.7	1	capn13_NM_001008024_+_scaffold_413:823431-864323@INTRON_8,
scaffold_281:579862-617015	scaffold_281:582662-582812	151	31.6	1	tspan18_NM_001100203_-_scaffold_281:576840-648915@INTRON_7,
scaffold_470:753623-774405	scaffold_470:770873-770973	101	31.6	1	ncoa1_NM_001112912_+_scaffold_470:615956-838333@INTRON_4,
scaffold_28:2616895-3006158	scaffold_28:2700195-2700345	151	31.5	1	dpp6_NM_001102992_+_scaffold_28:2616243-3245700@INTRON_1,
scaffold_60:3432908-3437124	scaffold_60:3436708-3436808	101	31.5	1	prmt10_NM_001142186_+_scaffold_60:3415240-3437227@INTRON_5,
scaffold_531:59534-465760	scaffold_531:234134-234284	151	31.5	1	cables2_NM_001114489_-_scaffold_531:58890-703245@INTRON_1,
scaffold_893:42763-178652	scaffold_893:53963-54113	151	31.5	1	bin1_NM_203900_-_scaffold_893:42301-198755@INTRON_1,
scaffold_138:278149-285557	scaffold_138:283699-283849	151	31.4	1	ccdc3_NM_001017103_-_scaffold_138:260189-286170@INTRON_2,
scaffold_173:774140-775852	scaffold_173:774790-774940	151	31.4	1	fgfr1op_NM_001016758_+_scaffold_173:742109-778097@INTRON_13,
scaffold_238:1069922-1118626	scaffold_238:1098522-1098622	101	31.4	1	btrc_NM_001016386_-_scaffold_238:1014158-1121027@INTRON_12,
scaffold_507:246775-247788	scaffold_507:247525-247675	151	31.4	1	fam102a_NM_001097168_-_scaffold_507:238163-268567@INTRON_6,
scaffold_893:42763-178652	scaffold_893:55363-55463	101	31.4	1	bin1_NM_203900_-_scaffold_893:42301-198755@INTRON_1,
scaffold_49:3250903-3254965	scaffold_49:3252353-3252453	101	31.3	1	c14orf109_NM_001037266_+_scaffold_49:3250831-3256405@INTRON_1,
scaffold_531:59534-465760	scaffold_531:80134-80284	151	31.3	1	cables2_NM_001114489_-_scaffold_531:58890-703245@INTRON_1,
scaffold_531:59534-465760	scaffold_531:199434-199534	101	31.3	1	cables2_NM_001114489_-_scaffold_531:58890-703245@INTRON_1,
scaffold_531:59534-465760	scaffold_531:244184-244284	101	31.3	1	cables2_NM_001114489_-_scaffold_531:58890-703245@INTRON_1,
scaffold_824:150682-210155	scaffold_824:197282-197382	101	31.3	1	cables2_NM_001114489_-_scaffold_824:150160-210472@INTRON_1,
scaffold_9:2310906-3030103	scaffold_9:2989156-2989306	151	31.2	1	cadm2_NM_001005713_+_scaffold_9:2310496-3241766@INTRON_1,
scaffold_45:1141736-1166284	scaffold_45:1163736-1163836	101	31.2	1	magi2_NM_001100212_+_scaffold_45:995790-1180312@INTRON_2,
scaffold_60:3432908-3437124	scaffold_60:3436458-3436558	101	31.2	1	prmt10_NM_001142186_+_scaffold_60:3415240-3437227@INTRON_5,
scaffold_188:895032-900475	scaffold_188:899432-899682	251	31.2	1	banp_NM_203864_-_scaffold_188:703445-903409@INTRON_10,
scaffold_413:652718-720114	scaffold_413:699418-699518	101	31.2	1	galnt14_NM_001078901_+_scaffold_413:536416-769069@INTRON_2,
scaffold_446:730870-943514	scaffold_446:903070-903220	151	31.2	1	bin1_NM_203900_-_scaffold_446:399955-972588@INTRON_2,
scaffold_26:3167773-3737968	scaffold_26:3605573-3605673	101	31.1	1	c1qtnf4_NM_001011345_-_scaffold_26:2470905-3738113@INTRON_3,
scaffold_264:1000754-1019681	scaffold_264:1007004-1007154	151	31.1	1	ccnyl1_NM_001016919_-_scaffold_264:963136-1019893@INTRON_9,
scaffold_482:654718-666800	scaffold_482:660068-660268	201	31.1	1	smap1_NM_001126910_+_scaffold_482:638486-733129@INTRON_2,
scaffold_637:3963-23704	scaffold_637:11663-11813	151	31.1	1	cyp7b1_NM_001127039_-_scaffold_637:2691-99015@INTRON_2,
scaffold_41:148571-157587	scaffold_41:150571-150671	101	31	1	tulp1_NM_001016482_-_scaffold_41:125078-229182@INTRON_8,
scaffold_83:77103-171208	scaffold_83:104953-105103	151	31	1	kiaa0146_NM_001142908_+_scaffold_83:27190-202187@INTRON_8,
scaffold_88:820476-832358	scaffold_88:823226-823326	101	31	1	LOC100127659_NM_001113003_-_scaffold_88:819104-840840@INTRON_1,
scaffold_127:104512-248490	scaffold_127:178612-178712	101	31	1	celf4_NM_001078910_-_scaffold_127:7653-738884@INTRON_10,
scaffold_127:248539-561605	scaffold_127:416539-416689	151	31	1	celf4_NM_001078910_-_scaffold_127:7653-738884@INTRON_11,
scaffold_396:890687-892784	scaffold_396:892387-892487	101	31	1	syngap1_NM_001134816_+_scaffold_396:883568-940928@INTRON_4,
scaffold_519:665346-669475	scaffold_519:666796-666896	101	31	1	cyp46a1_NM_001079082_+_scaffold_519:646463-672901@INTRON_12,
scaffold_79:1772801-2156564	scaffold_79:1836651-1836801	151	30.9	1	slc39a3_NM_001102697_+_scaffold_79:680766-2284175@INTRON_13,
scaffold_99:470699-746188	scaffold_99:686599-686749	151	30.9	1	LOC100158618_NM_001128034_-_scaffold_99:470628-1073815@INTRON_1,
scaffold_198:1140677-1162470	scaffold_198:1155527-1155627	101	30.9	1	fbxo41_NM_001079043_+_scaffold_198:1125851-1176330@INTRON_2,
scaffold_413:536676-652548	scaffold_413:607376-607526	151	30.9	1	galnt14_NM_001078901_+_scaffold_413:536416-769069@INTRON_1,
scaffold_554:4160-21822	scaffold_554:8610-8710	101	30.9	1	pcsk5_NM_001079038_-_scaffold_554:4070-92883@INTRON_1,
scaffold_95:1284466-1297932	scaffold_95:1291966-1292066	101	30.8	1	tnfrsf11a_NM_001100262_+_scaffold_95:1262989-1319515@INTRON_2,
scaffold_539:400714-696958	scaffold_539:476014-476114	101	30.8	1	trac_NM_001007866_+_scaffold_539:367901-704473@INTRON_4,
scaffold_99:1446550-1503872	scaffold_99:1478700-1478800	101	30.7	1	tsnare1_NM_001112923_+_scaffold_99:1366510-1504214@INTRON_9,
scaffold_576:598979-647892	scaffold_576:644229-644329	101	30.7	1	uhrf1bp1l_NM_001130247_-_scaffold_576:598486-704443@INTRON_1,
scaffold_1266:62686-100512	scaffold_1266:68486-68636	151	30.7	1	lmna_NM_001045683_-_scaffold_1266:52176-100903@INTRON_11,
scaffold_90:93446-289130	scaffold_90:275396-275546	151	30.6	1	syt4_NM_001171514_-_scaffold_90:93400-289196@INTRON_1,
scaffold_531:59534-465760	scaffold_531:186734-186884	151	30.6	1	cables2_NM_001114489_-_scaffold_531:58890-703245@INTRON_1,
scaffold_544:658195-662538	scaffold_544:661945-662045	101	30.6	1	nav2_NM_001128641_-_scaffold_544:595428-773120@INTRON_28,
scaffold_573:291154-577850	scaffold_573:486004-486104	101	30.6	1	myo15a_NM_001100245_-_scaffold_573:284514-577897@INTRON_3,
scaffold_591:7874-11011	scaffold_591:9524-9624	101	30.6	1	ercc1_NM_001113921_-_scaffold_591:6899-41184@INTRON_2,
scaffold_1942:21618-25798	scaffold_1942:24168-24268	101	30.6	1	prkca_NM_001079284_+_scaffold_1942:8139-25848@INTRON_9,
scaffold_6:5421175-5424936	scaffold_6:5423875-5423975	101	30.5	1	n4bp1_NM_001004870_+_scaffold_6:5420859-5442162@INTRON_1,
scaffold_6:5275425-5562513	scaffold_6:5423875-5423975	101	30.5	1	slc39a3_NM_001102697_-_scaffold_6:2781856-5867994@INTRON_12,
scaffold_724:351808-357390	scaffold_724:352258-352458	201	30.5	1	btbd9_NM_001127131_-_scaffold_724:350128-399029@INTRON_2,
scaffold_893:42763-178652	scaffold_893:66213-66313	101	30.5	1	bin1_NM_203900_-_scaffold_893:42301-198755@INTRON_1,
scaffold_1237:44711-47781	scaffold_1237:45911-46011	101	30.5	1	sult1b1_NM_001102784_+_scaffold_1237:44693-52692@INTRON_1,
scaffold_113:862408-870407	scaffold_113:867058-867158	101	30.4	1	fcho2_NM_001142071_+_scaffold_113:832210-902166@INTRON_5,
scaffold_119:2554760-2558523	scaffold_119:2555410-2555510	101	30.4	1	ddx10_NM_001102681_+_scaffold_119:2541739-2595489@INTRON_6,
scaffold_531:59534-465760	scaffold_531:184134-184234	101	30.4	1	cables2_NM_001114489_-_scaffold_531:58890-703245@INTRON_1,
scaffold_638:203567-236954	scaffold_638:219567-219667	101	30.4	1	ptk2b_NM_001011049_+_scaffold_638:203103-237299@INTRON_7,
scaffold_1126:208793-213141	scaffold_1126:209593-209693	101	30.4	1	sox5_NM_001128658_+_scaffold_1126:56803-218005@INTRON_6,
scaffold_34:3556578-3918839	scaffold_34:3826128-3826228	101	30.3	1	sirt4_NM_001045628_-_scaffold_34:2890969-3918895@INTRON_6,
scaffold_67:580546-588871	scaffold_67:587396-587496	101	30.3	1	b4galnt1_NM_001126696_-_scaffold_67:561404-643222@INTRON_11,
scaffold_531:59534-465760	scaffold_531:96134-96284	151	30.3	1	cables2_NM_001114489_-_scaffold_531:58890-703245@INTRON_1,
scaffold_446:730870-943514	scaffold_446:852770-852920	151	30.2	1	bin1_NM_203900_-_scaffold_446:399955-972588@INTRON_2,
scaffold_841:23272-82437	scaffold_841:82022-82172	151	30.2	1	ralyl_NM_001078745_+_scaffold_841:23180-232688@INTRON_1,
scaffold_966:165787-240888	scaffold_966:199237-199337	101	30.2	1	fastkd3_NM_001142147_+_scaffold_966:71912-241109@INTRON_7,
scaffold_99:470699-746188	scaffold_99:652399-652499	101	30	1	LOC100158618_NM_001128034_-_scaffold_99:470628-1073815@INTRON_1,
scaffold_448:326229-327581	scaffold_448:326579-326729	151	30	1	elof1_NM_203680_-_scaffold_448:325285-330116@INTRON_1,
scaffold_279:1408775-1440277	scaffold_279:1412925-1413075	151	29.9	1	tagln2_NM_204023_+_scaffold_279:1408756-1443940@INTRON_1,
scaffold_650:282858-395124	scaffold_650:308058-308208	151	29.9	1	aplp1_NM_001127434_+_scaffold_650:243440-395456@INTRON_13,
scaffold_501:803938-816898	scaffold_501:811038-811188	151	29.8	1	mta1_NM_001011163_-_scaffold_501:781308-828748@INTRON_15,
scaffold_140:201972-248916	scaffold_140:241822-241972	151	29.7	1	gabbr2_NM_001016007_+_scaffold_140:100515-451999@INTRON_2,
scaffold_457:119502-129633	scaffold_457:122452-122602	151	29.6	1	LOC100145536_NM_001126973_+_scaffold_457:112188-134185@INTRON_3,
scaffold_535:269178-769927	scaffold_535:705878-706028	151	29.6	1	hist2h2ab_NM_001030325_-_scaffold_535:268679-770176@INTRON_1,
scaffold_69:1972748-2785795	scaffold_69:2687598-2687748	151	29.5	1	sh2b3_NM_001100247_+_scaffold_69:1972551-2786447@INTRON_1,
scaffold_255:1149404-1520158	scaffold_255:1262254-1262404	151	29.5	1	tbxas1_NM_001171526_-_scaffold_255:1149227-1520937@INTRON_1,
scaffold_137:1571333-1613652	scaffold_137:1600533-1600683	151	29.4	1	fam69b_NM_001097225_-_scaffold_137:1566465-1625275@INTRON_4,
scaffold_328:128130-146937	scaffold_328:142630-142780	151	29.4	1	gpr116_NM_001113826_+_scaffold_328:121970-168787@INTRON_2,
scaffold_329:1010717-1025595	scaffold_329:1016317-1016467	151	29.1	1	cryl1_NM_001127026_-_scaffold_329:992921-1039446@INTRON_5,
scaffold_8:3677203-3711393	scaffold_8:3684453-3684603	151	28.9	1	pcsk2_NM_001097191_+_scaffold_8:3676804-3764327@INTRON_1,
scaffold_1237:44711-47781	scaffold_1237:45661-45811	151	28.8	1	sult1b1_NM_001102784_+_scaffold_1237:44693-52692@INTRON_1,
scaffold_722:16978-42920	scaffold_722:21628-21778	151	28.7	1	fhl2_NM_001126761_+_scaffold_722:16640-59382@INTRON_1,
scaffold_576:598979-647892	scaffold_576:633129-633279	151	28.5	1	uhrf1bp1l_NM_001130247_-_scaffold_576:598486-704443@INTRON_1,
scaffold_692:158426-159500	scaffold_692:158476-158626	151	28.5	1	fstl1_NM_001045756_+_scaffold_692:158105-170153@INTRON_2,
scaffold_178:1083569-1084964	scaffold_178:1084219-1084369	151	28.4	1	abcc3_NM_001113829_-_scaffold_178:1068155-1113350@INTRON_16,
scaffold_255:1149404-1520158	scaffold_255:1448454-1448604	151	28.3	1	tbxas1_NM_001171526_-_scaffold_255:1149227-1520937@INTRON_1,
scaffold_501:803938-816898	scaffold_501:811538-811688	151	28	1	mta1_NM_001011163_-_scaffold_501:781308-828748@INTRON_15,
scaffold_99:746527-986057	scaffold_99:891777-891927	151	27.8	1	LOC100158618_NM_001128034_-_scaffold_99:470628-1073815@INTRON_3,
scaffold_446:400203-730662	scaffold_446:689353-689503	151	27.7	1	bin1_NM_203900_-_scaffold_446:399955-972588@INTRON_1,
scaffold_726:95689-262505	scaffold_726:142339-142489	151	27.7	1	lsamp_NM_001102915_+_scaffold_726:95608-448976@INTRON_1,
scaffold_531:264446-281602	scaffold_531:272646-272796	151	27.6	1	cdh4_NM_001123479_+_scaffold_531:254909-315461@INTRON_2,
scaffold_41:201101-229123	scaffold_41:218901-219051	151	27.4	1	tulp1_NM_001016482_-_scaffold_41:125078-229182@INTRON_12,
scaffold_11:4994674-5097744	scaffold_11:5088974-5089124	151	27.3	1	celf2_NM_001102947_+_scaffold_11:4994435-5231750@INTRON_1,
scaffold_255:1149404-1520158	scaffold_255:1230304-1230454	151	27.3	1	tbxas1_NM_001171526_-_scaffold_255:1149227-1520937@INTRON_1,
scaffold_201:416935-424457	scaffold_201:422535-422685	151	27.2	1	ribc2_NM_001127422_-_scaffold_201:416788-429390@INTRON_1,
scaffold_43:2732754-3005984	scaffold_43:2985554-2985704	151	27.1	1	mitf_NM_001100277_-_scaffold_43:2684980-3006141@INTRON_3,
scaffold_71:278431-292111	scaffold_71:282331-282481	151	27.1	1	abi3bp_NM_001030520_+_scaffold_71:186237-373235@INTRON_8,
scaffold_19:1020285-1023129	scaffold_19:1021985-1022135	151	26.9	1	ccnc_NM_203826_+_scaffold_19:1010068-1024786@INTRON_10,
scaffold_218:202413-212521	scaffold_218:211463-211613	151	26.8	1	casp10_NM_001015715_-_scaffold_218:191804-225457@INTRON_7,
scaffold_739:59948-139476	scaffold_739:74848-74998	151	26.8	1	ptk2b_NM_001011049_+_scaffold_739:59876-140371@INTRON_1,
scaffold_800:215561-226423	scaffold_800:221111-221261	151	26.7	1	tcirg1_NM_001016849_+_scaffold_800:209609-280020@INTRON_3,
scaffold_429:693151-732102	scaffold_429:705101-705251	151	26.6	1	c6orf106_NM_001126074_+_scaffold_429:692611-745917@INTRON_1,
scaffold_254:841149-845931	scaffold_254:841899-842049	151	26.5	1	bmper_NM_001044402_+_scaffold_254:771795-887260@INTRON_10,
scaffold_138:278149-285557	scaffold_138:283449-283599	151	26.4	1	ccdc3_NM_001017103_-_scaffold_138:260189-286170@INTRON_2,
scaffold_52:3220538-3231146	scaffold_52:3225888-3226038	151	26.3	1	dgkb_NM_001102744_+_scaffold_52:3184081-3450535@INTRON_2,
scaffold_379:754453-761319	scaffold_379:759103-759253	151	26	1	kdm2a_NM_001011176_-_scaffold_379:748893-783628@INTRON_3,
scaffold_60:1319847-1321264	scaffold_60:1320297-1320447	151	25.9	1	mnd1_NM_001015849_-_scaffold_60:1300192-1323355@INTRON_6,
scaffold_188:895032-900475	scaffold_188:899282-899432	151	25.5	1	banp_NM_203864_-_scaffold_188:703445-903409@INTRON_10,
scaffold_70:155902-157378	scaffold_70:156652-156802	151	24.9	1	hccs_NM_001005708_-_scaffold_70:152361-158219@INTRON_5,
scaffold_320:125843-141808	scaffold_320:133743-133893	151	24.8	1	cnot10_NM_001016273_+_scaffold_320:90780-157478@INTRON_9,
scaffold_474:371345-601733	scaffold_474:551145-551295	151	24.8	1	commd2_NM_001113076_-_scaffold_474:188066-601774@INTRON_3,
scaffold_637:3963-23704	scaffold_637:11363-11513	151	24.8	1	cyp7b1_NM_001127039_-_scaffold_637:2691-99015@INTRON_2,
scaffold_79:1772801-2156564	scaffold_79:2031351-2031501	151	24	1	slc39a3_NM_001102697_+_scaffold_79:680766-2284175@INTRON_13,
scaffold_155:1999525-2001545	scaffold_155:2000675-2000825	151	23.3	1	mapt_NM_001078997_-_scaffold_155:1993443-2041045@INTRON_3,
scaffold_140:728778-798138	scaffold_140:731778-731928	151	22.9	1	ctnnal1_NM_001102965_+_scaffold_140:728415-927801@INTRON_1,
scaffold_67:580546-588871	scaffold_67:585296-585446	151	22.8	1	b4galnt1_NM_001126696_-_scaffold_67:561404-643222@INTRON_11,
scaffold_289:521955-527813	scaffold_289:526055-526205	151	22.6	1	stk11_NM_001016533_-_scaffold_289:498004-528230@INTRON_9,
scaffold_213:1136331-1138090	scaffold_213:1136781-1136931	151	22.1	1	fam65b_NM_001130276_-_scaffold_213:1132412-1198555@INTRON_2,
scaffold_71:743158-795200	scaffold_71:794808-794958	151	65.4	2	LOC779492_NM_001134807_-_scaffold_71:349196-795262@INTRON_2,
scaffold_238:1069922-1118626	scaffold_238:1098022-1098272	251	55.4	2	btrc_NM_001016386_-_scaffold_238:1014158-1121027@INTRON_12,
scaffold_744:418893-421504	scaffold_744:419593-419743	151	52.4	2	rnf5_NM_001017071_+_scaffold_744:417144-428379@INTRON_2,
scaffold_744:422261-423910	scaffold_744:422561-422711	151	51.2	2	rnf5_NM_001017071_+_scaffold_744:417144-428379@INTRON_4,
scaffold_95:2184035-2245205	scaffold_95:2232885-2232985	101	50.4	2	gmds_NM_001037253_+_scaffold_95:2116652-2469750@INTRON_5,
scaffold_259:1412962-1422945	scaffold_259:1421212-1421312	101	49.8	2	epyc_NM_001005627_-_scaffold_259:1398996-1443140@INTRON_4,
scaffold_71:743158-795200	scaffold_71:785858-786058	201	49.2	2	LOC779492_NM_001134807_-_scaffold_71:349196-795262@INTRON_2,
scaffold_493:584132-864048	scaffold_493:599532-599782	251	45.8	2	LOC100037835_NM_001114850_-_scaffold_493:557105-866867@INTRON_2,
scaffold_7:41779-709718	scaffold_7:44279-44429	151	44.1	2	myo15a_NM_001100245_+_scaffold_7:41322-933681@INTRON_1,
scaffold_362:146071-412734	scaffold_362:289521-289721	201	43.6	2	btn2a1_NM_001130216_+_scaffold_362:142052-412801@INTRON_4,
scaffold_531:59534-465760	scaffold_531:225734-225884	151	41.1	2	cables2_NM_001114489_-_scaffold_531:58890-703245@INTRON_1,
scaffold_1116:52838-53583	scaffold_1116:53088-53338	251	39.8	2	scube2_NM_001079034_-_scaffold_1116:12585-61394@INTRON_18,
scaffold_1116:42193-52703	scaffold_1116:51443-51693	251	39.6	2	scube2_NM_001079034_-_scaffold_1116:12585-61394@INTRON_17,
scaffold_1284:57929-63302	scaffold_1284:59479-59629	151	39.6	2	col9a3_NM_001127025_-_scaffold_1284:46862-81604@INTRON_21,
scaffold_41:148571-157587	scaffold_41:149821-149921	101	38.4	2	tulp1_NM_001016482_-_scaffold_41:125078-229182@INTRON_8,
scaffold_1187:20270-33266	scaffold_1187:21620-21770	151	37.7	2	c22orf9_NM_001113902_-_scaffold_1187:12083-33497@INTRON_9,
scaffold_55:559359-564512	scaffold_55:562809-562959	151	36.9	2	dner_NM_001122791_+_scaffold_55:509389-592771@INTRON_3,
scaffold_716:451835-488014	scaffold_716:466585-466735	151	36.2	2	chmp5_NM_001015720_-_scaffold_716:423203-501699@INTRON_3,
scaffold_716:451835-488014	scaffold_716:466585-466735	151	36.2	2	chmp5_NM_001016748_-_scaffold_716:423199-501699@INTRON_3,
scaffold_291:436482-444932	scaffold_291:442032-442182	151	36	2	dnajb11_NM_203849_-_scaffold_291:409790-496794@INTRON_3,
scaffold_127:248539-561605	scaffold_127:273889-274039	151	35.7	2	celf4_NM_001078910_-_scaffold_127:7653-738884@INTRON_11,
scaffold_291:447209-465196	scaffold_291:453609-453759	151	35.7	2	dnajb11_NM_203849_-_scaffold_291:409790-496794@INTRON_5,
scaffold_41:933702-937195	scaffold_41:934452-934552	101	35.2	2	prelp_NM_001102738_-_scaffold_41:930725-957276@INTRON_1,
scaffold_29:2270893-2276794	scaffold_29:2272893-2273043	151	35.1	2	psme3_NM_001102730_+_scaffold_29:2270780-2295472@INTRON_1,
scaffold_650:243690-272419	scaffold_650:245140-245290	151	34.3	2	aplp1_NM_001127434_+_scaffold_650:243440-395456@INTRON_1,
scaffold_7:40671-49875	scaffold_7:44271-44471	201	34.2	2	kremen1_NM_001123455_+_scaffold_7:23411-80141@INTRON_2,
scaffold_989:79725-92152	scaffold_989:91425-91575	151	33.8	2	dnz1_NM_001016218_+_scaffold_989:79582-97263@INTRON_1,
scaffold_917:96153-113230	scaffold_917:108203-108303	101	33.7	2	LOC100145466_NM_001126918_+_scaffold_917:91434-119111@INTRON_3,
scaffold_950:174249-181062	scaffold_950:180549-180649	101	33.5	2	ctr9_NM_001005076_-_scaffold_950:165206-181510@INTRON_19,
scaffold_16:1547869-1803167	scaffold_16:1785219-1785419	201	33.3	2	ypel2_NM_001102689_+_scaffold_16:1547739-2300995@INTRON_1,
scaffold_893:209197-234224	scaffold_893:219997-220147	151	33.2	2	bin1_NM_203900_-_scaffold_893:176176-234345@INTRON_13,
scaffold_123:2520000-2572916	scaffold_123:2536950-2537050	101	32.9	2	gatad1_NM_001170506_+_scaffold_123:2243843-2573111@INTRON_2,
scaffold_739:59948-139476	scaffold_739:61598-61748	151	32.8	2	ptk2b_NM_001011049_+_scaffold_739:59876-140371@INTRON_1,
scaffold_137:2036508-2351066	scaffold_137:2118508-2118608	101	32.7	2	sox18_NM_001129937_+_scaffold_137:1651945-2351448@INTRON_3,
scaffold_55:794510-811283	scaffold_55:808560-808660	101	32.6	2	slc19a3_NM_001006754_+_scaffold_55:785830-812759@INTRON_3,
scaffold_739:73134-101821	scaffold_739:74634-74784	151	32.6	2	ptk2b_NM_001011049_+_scaffold_739:73062-142016@INTRON_1,
scaffold_71:743158-795200	scaffold_71:753458-753558	101	32.4	2	LOC779492_NM_001134807_-_scaffold_71:349196-795262@INTRON_2,
scaffold_137:1701617-2340456	scaffold_137:2118767-2118867	101	32.4	2	bin1_NM_203900_+_scaffold_137:795532-2340846@INTRON_5,
scaffold_127:248539-561605	scaffold_127:297589-297689	101	32.2	2	celf4_NM_001078910_-_scaffold_127:7653-738884@INTRON_11,
scaffold_739:59948-139476	scaffold_739:74648-74798	151	32.2	2	ptk2b_NM_001011049_+_scaffold_739:59876-140371@INTRON_1,
scaffold_140:1174760-1196345	scaffold_140:1180410-1180610	201	32	2	tmeff1_NM_001100268_+_scaffold_140:1093531-1225056@INTRON_5,
scaffold_726:95689-262505	scaffold_726:220639-220739	101	31.8	2	lsamp_NM_001102915_+_scaffold_726:95608-448976@INTRON_1,
scaffold_137:2036508-2351066	scaffold_137:2118758-2118858	101	31.5	2	sox18_NM_001129937_+_scaffold_137:1651945-2351448@INTRON_3,
scaffold_508:633164-639630	scaffold_508:636014-636114	101	31.5	2	adam19_NM_001040016_-_scaffold_508:608207-643432@INTRON_19,
scaffold_127:248539-561605	scaffold_127:395089-395189	101	31.4	2	celf4_NM_001078910_-_scaffold_127:7653-738884@INTRON_11,
scaffold_601:295841-309697	scaffold_601:309141-309241	101	31.1	2	akr1c4_NM_001011079_-_scaffold_601:295757-310107@INTRON_1,
scaffold_726:95689-262505	scaffold_726:220189-220289	101	31	2	lsamp_NM_001102915_+_scaffold_726:95608-448976@INTRON_1,
scaffold_9:2310906-3030103	scaffold_9:2935106-2935206	101	30.7	2	cadm2_NM_001005713_+_scaffold_9:2310496-3241766@INTRON_1,
scaffold_409:599075-842329	scaffold_409:608325-608425	101	30.6	2	LOC100492947_NM_001195230_+_scaffold_409:598989-842684@INTRON_2,
scaffold_1001:9157-197737	scaffold_1001:24057-24157	101	30.6	2	bin1_NM_203900_+_scaffold_1001:2522-198268@INTRON_2,
scaffold_291:436482-444932	scaffold_291:441882-441982	101	30.5	2	dnajb11_NM_203849_-_scaffold_291:409790-496794@INTRON_3,
scaffold_291:447209-465196	scaffold_291:453459-453559	101	30.4	2	dnajb11_NM_203849_-_scaffold_291:409790-496794@INTRON_5,
scaffold_573:291154-577850	scaffold_573:474654-474754	101	30.2	2	myo15a_NM_001100245_-_scaffold_573:284514-577897@INTRON_3,
scaffold_744:418893-421504	scaffold_744:420143-420243	101	30.2	2	rnf5_NM_001017071_+_scaffold_744:417144-428379@INTRON_2,
scaffold_170:817297-899043	scaffold_170:862447-862547	101	30	2	chst8_NM_001079061_-_scaffold_170:806600-1049192@INTRON_2,
scaffold_254:420908-441326	scaffold_254:424358-424458	101	30	2	bbs9_NM_001016821_+_scaffold_254:405994-575912@INTRON_5,
scaffold_16:1958218-2300589	scaffold_16:2092718-2092868	151	29.3	2	ypel2_NM_001102689_+_scaffold_16:1547739-2300995@INTRON_4,
scaffold_493:584132-864048	scaffold_493:599832-599982	151	27.6	2	LOC100037835_NM_001114850_-_scaffold_493:557105-866867@INTRON_2,
scaffold_115:763332-764598	scaffold_115:764182-764282	101	42.6	3	c6orf167_NM_001128044_+_scaffold_115:728644-770275@INTRON_16,
scaffold_386:645305-1101085	scaffold_386:1038155-1038305	151	39.4	3	ifit5_NM_001142188_-_scaffold_386:175917-1101219@INTRON_6,
scaffold_16:1547869-1803167	scaffold_16:1784719-1784819	101	38.6	3	ypel2_NM_001102689_+_scaffold_16:1547739-2300995@INTRON_1,
scaffold_41:190029-200298	scaffold_41:193129-193279	151	37	3	tulp1_NM_001016482_-_scaffold_41:125078-229182@INTRON_10,
scaffold_196:290332-394732	scaffold_196:330882-331032	151	36.4	3	grm7_NM_001113008_+_scaffold_196:289716-556761@INTRON_1,
scaffold_413:652718-720114	scaffold_413:717418-717568	151	35.8	3	galnt14_NM_001078901_+_scaffold_413:536416-769069@INTRON_2,
scaffold_692:240198-451961	scaffold_692:406548-406698	151	34.8	3	pias3_NM_001123418_-_scaffold_692:230800-452421@INTRON_4,
scaffold_49:2523275-2532530	scaffold_49:2528825-2528975	151	34.1	3	c14orf159_NM_001016461_+_scaffold_49:2523218-2549833@INTRON_1,
scaffold_34:3556578-3918839	scaffold_34:3606678-3606778	101	33.5	3	sirt4_NM_001045628_-_scaffold_34:2890969-3918895@INTRON_6,
scaffold_386:645305-1101085	scaffold_386:1049955-1050155	201	32.9	3	ifit5_NM_001142188_-_scaffold_386:175917-1101219@INTRON_6,
scaffold_36:307489-311465	scaffold_36:308389-308489	101	32.1	3	LOC100145209_NM_001126697_+_scaffold_36:295717-331699@INTRON_9,
scaffold_63:2876728-2969424	scaffold_63:2967728-2967828	101	31.9	3	xkr6_NM_001033943_+_scaffold_63:2876025-2972164@INTRON_1,
scaffold_188:712226-787198	scaffold_188:752776-752876	101	31.3	3	banp_NM_203864_-_scaffold_188:703445-903409@INTRON_2,
scaffold_366:1034883-1035733	scaffold_366:1035233-1035383	151	31.3	3	slc47a2_NM_001102970_+_scaffold_366:1008257-1039407@INTRON_8,
scaffold_429:693151-732102	scaffold_429:704701-704801	101	31.2	3	c6orf106_NM_001126074_+_scaffold_429:692611-745917@INTRON_1,
scaffold_291:447209-465196	scaffold_291:453909-454059	151	30.8	3	dnajb11_NM_203849_-_scaffold_291:409790-496794@INTRON_5,
scaffold_52:1205932-1220549	scaffold_52:1207332-1207432	101	30.1	3	tmem196_NM_001102979_+_scaffold_52:1188442-1221118@INTRON_3,
scaffold_213:1664246-1708295	scaffold_213:1698896-1699046	151	24.9	3	pard6g_NM_001017338_+_scaffold_213:1643597-1711180@INTRON_2,
scaffold_578:491739-563864	scaffold_578:525039-525139	101	46.8	4	LOC733855_NM_001045601_+_scaffold_578:490506-667922@INTRON_2,
scaffold_1942:21618-25798	scaffold_1942:24268-24468	201	39.9	4	prkca_NM_001079284_+_scaffold_1942:8139-25848@INTRON_9,
scaffold_726:95689-262505	scaffold_726:250639-250789	151	36.4	4	lsamp_NM_001102915_+_scaffold_726:95608-448976@INTRON_1,
scaffold_127:248539-561605	scaffold_127:554489-554589	101	35.4	4	celf4_NM_001078910_-_scaffold_127:7653-738884@INTRON_11,
scaffold_1187:20270-33266	scaffold_1187:21520-21620	101	34.1	4	c22orf9_NM_001113902_-_scaffold_1187:12083-33497@INTRON_9,
scaffold_817:13277-26290	scaffold_817:24027-24127	101	34	4	cltc_NM_001011039_-_scaffold_817:13069-26535@INTRON_1,
scaffold_830:359995-378677	scaffold_830:363045-363195	151	34	4	ctsz_NM_001112956_-_scaffold_830:358631-380333@INTRON_3,
scaffold_650:243690-272419	scaffold_650:245340-245440	101	33.3	4	aplp1_NM_001127434_+_scaffold_650:243440-395456@INTRON_1,
scaffold_41:3269845-3283209	scaffold_41:3280345-3280495	151	31.3	4	dcaf6_NM_001079565_-_scaffold_41:3229866-3313374@INTRON_11,
scaffold_531:59534-465760	scaffold_531:272684-272784	101	31.2	4	cables2_NM_001114489_-_scaffold_531:58890-703245@INTRON_1,
scaffold_650:282858-395124	scaffold_650:369658-369758	101	31.2	4	aplp1_NM_001127434_+_scaffold_650:243440-395456@INTRON_13,
scaffold_49:1723436-1795801	scaffold_49:1771936-1772036	101	30.6	4	cyp46a1_NM_001126803_+_scaffold_49:1707094-1800771@INTRON_9,
scaffold_5:4170507-4197822	scaffold_5:4173607-4173707	101	30.5	4	c9orf30_NM_001016739_+_scaffold_5:4170366-4254549@INTRON_1,
scaffold_1001:7397-37823	scaffold_1001:24247-24347	101	30.5	4	sox6_NM_001123415_+_scaffold_1001:3331-94550@INTRON_2,
scaffold_573:291154-577850	scaffold_573:472054-472204	151	29.1	4	myo15a_NM_001100245_-_scaffold_573:284514-577897@INTRON_3,
scaffold_117:1557511-1626638	scaffold_117:1594811-1594961	151	27.5	4	fam155b_NM_001102863_-_scaffold_117:1547082-1627493@INTRON_2,
scaffold_422:108546-193707	scaffold_422:154996-155146	151	41.8	5	poll_NM_001100246_+_scaffold_422:108459-193789@INTRON_1,
scaffold_99:1446550-1503872	scaffold_99:1462100-1462200	101	39.8	5	tsnare1_NM_001112923_+_scaffold_99:1366510-1504214@INTRON_9,
scaffold_69:1972748-2785795	scaffold_69:2327148-2327248	101	39	5	sh2b3_NM_001100247_+_scaffold_69:1972551-2786447@INTRON_1,
scaffold_893:42763-178652	scaffold_893:64363-64513	151	38.9	5	bin1_NM_203900_-_scaffold_893:42301-198755@INTRON_1,
scaffold_106:1680115-2016415	scaffold_106:1887665-1887815	151	37.4	5	slc39a3_NM_001102697_-_scaffold_106:83848-2455684@INTRON_10,
scaffold_127:104512-248490	scaffold_127:105012-105112	101	37	5	celf4_NM_001078910_-_scaffold_127:7653-738884@INTRON_10,
scaffold_821:204483-242773	scaffold_821:215533-215633	101	35.4	5	igsf21_NM_001078772_+_scaffold_821:153666-249814@INTRON_3,
scaffold_6:3927129-4384212	scaffold_6:4145179-4145329	151	34.7	5	slc39a3_NM_001102697_-_scaffold_6:2781856-5867994@INTRON_9,
scaffold_739:73134-101821	scaffold_739:74884-74984	101	34.6	5	ptk2b_NM_001011049_+_scaffold_739:73062-142016@INTRON_1,
scaffold_6:4127277-4149603	scaffold_6:4145177-4145327	151	34	5	vac14_NM_001142192_+_scaffold_6:4109725-4192899@INTRON_9,
scaffold_742:364243-371186	scaffold_742:366043-366143	101	31.7	5	tmbim4_NM_001004879_+_scaffold_742:364111-375553@INTRON_1,
scaffold_301:598065-609380	scaffold_301:606965-607065	101	31.5	5	ptprs_NM_001141992_+_scaffold_301:463997-609567@INTRON_10,
scaffold_1001:9157-197737	scaffold_1001:24257-24357	101	31.3	5	bin1_NM_203900_+_scaffold_1001:2522-198268@INTRON_2,
scaffold_89:2366026-2389844	scaffold_89:2383826-2383926	101	31.1	5	ndst3_NM_001127047_+_scaffold_89:2365635-2489381@INTRON_1,
scaffold_446:730870-943514	scaffold_446:816770-816870	101	31	5	bin1_NM_203900_-_scaffold_446:399955-972588@INTRON_2,
scaffold_982:57963-69727	scaffold_982:65613-65713	101	30.5	5	znf300_NM_001016118_+_scaffold_982:52021-73563@INTRON_6,
scaffold_115:857131-874804	scaffold_115:869631-869731	101	41.5	6	klhl32_NM_001016857_-_scaffold_115:771294-916007@INTRON_8,
scaffold_550:460681-462876	scaffold_550:462131-462231	101	39.8	6	rpp30_NM_001016584_-_scaffold_550:457229-481977@INTRON_5,
scaffold_343:448518-496568	scaffold_343:490018-490118	101	36.6	6	ccni_NM_001005690_+_scaffold_343:432412-503101@INTRON_2,
scaffold_137:2036508-2351066	scaffold_137:2119108-2119208	101	34.1	6	sox18_NM_001129937_+_scaffold_137:1651945-2351448@INTRON_3,
scaffold_152:1104097-1111514	scaffold_152:1109047-1109197	151	33.2	6	sirt4_NM_001045628_+_scaffold_152:1103851-1507544@INTRON_3,
scaffold_1327:49036-85298	scaffold_1327:81986-82086	101	32.7	6	cntfr_NM_001114251_+_scaffold_1327:33250-93039@INTRON_2,
scaffold_1126:198572-205548	scaffold_1126:205022-205122	101	31.8	6	sox5_NM_001128658_+_scaffold_1126:56803-218005@INTRON_4,
scaffold_279:1408775-1440277	scaffold_279:1413175-1413275	101	31.6	6	tagln2_NM_204023_+_scaffold_279:1408756-1443940@INTRON_1,
scaffold_717:181402-185443	scaffold_717:184402-184502	101	31.6	6	pcsk4_NM_001078893_+_scaffold_717:169683-196811@INTRON_3,
scaffold_5:4489661-4654623	scaffold_5:4518361-4518461	101	30.6	6	ifit5_NM_001142188_-_scaffold_5:4404167-4654764@INTRON_3,
scaffold_154:958812-972051	scaffold_154:965662-965762	101	30.4	6	atp2b3_NM_001131043_+_scaffold_154:878268-1011465@INTRON_6,
scaffold_140:201972-248916	scaffold_140:242122-242222	101	58.3	7	gabbr2_NM_001016007_+_scaffold_140:100515-451999@INTRON_2,
scaffold_343:448518-496568	scaffold_343:490168-490268	101	40.5	7	ccni_NM_001005690_+_scaffold_343:432412-503101@INTRON_2,
scaffold_69:2325082-2329374	scaffold_69:2327132-2327232	101	39	7	aldh9a1_NM_001006904_+_scaffold_69:2323488-2342041@INTRON_2,
scaffold_124:206654-210569	scaffold_124:207454-207604	151	34.5	7	LOC100170615_NM_001130378_+_scaffold_124:200571-220805@INTRON_3,
scaffold_89:755112-760157	scaffold_89:756412-756512	101	33.1	7	cfi_NM_001032337_+_scaffold_89:751765-769840@INTRON_2,
scaffold_137:1701617-2340456	scaffold_137:2119117-2119217	101	32.2	7	bin1_NM_203900_+_scaffold_137:795532-2340846@INTRON_5,
scaffold_446:400203-730662	scaffold_446:532453-532553	101	30.8	7	bin1_NM_203900_-_scaffold_446:399955-972588@INTRON_1,
scaffold_531:59534-465760	scaffold_531:151884-151984	101	30.3	7	cables2_NM_001114489_-_scaffold_531:58890-703245@INTRON_1,
scaffold_106:1858895-1892268	scaffold_106:1887695-1887845	151	29.8	7	rps6ka1_NM_001123459_+_scaffold_106:1858848-1919668@INTRON_1,
scaffold_137:1345546-1622175	scaffold_137:1600396-1600496	101	35.8	8	bin1_NM_203900_+_scaffold_137:795532-2340846@INTRON_2,
scaffold_131:2207820-2225270	scaffold_131:2214370-2214520	151	33.6	8	pdcd6_NM_001008003_-_scaffold_131:2187603-2225400@INTRON_5,
scaffold_531:59534-465760	scaffold_531:95984-96084	101	33	8	cables2_NM_001114489_-_scaffold_531:58890-703245@INTRON_1,
scaffold_531:59534-465760	scaffold_531:90584-90684	101	32.7	8	cables2_NM_001114489_-_scaffold_531:58890-703245@INTRON_1,
scaffold_1001:9157-197737	scaffold_1001:59757-59857	101	30.8	8	bin1_NM_203900_+_scaffold_1001:2522-198268@INTRON_2,
scaffold_724:351808-357390	scaffold_724:352058-352158	101	36.2	9	btbd9_NM_001127131_-_scaffold_724:350128-399029@INTRON_2,
scaffold_255:499140-523315	scaffold_255:513890-513990	101	35.8	9	gas7_NM_001127048_+_scaffold_255:470544-531011@INTRON_3,
scaffold_344:725160-732774	scaffold_344:726360-726560	201	35.3	9	LOC100158523_NM_001127960_+_scaffold_344:663538-753973@INTRON_11,
scaffold_89:1050220-1052407	scaffold_89:1052120-1052220	101	31.5	9	LOC100327248_NM_001171530_-_scaffold_89:1043838-1052475@INTRON_5,
scaffold_139:534220-599125	scaffold_139:576170-576270	101	30.8	9	arhgap26_NM_001126773_+_scaffold_139:533849-810043@INTRON_1,
scaffold_247:1633157-1639535	scaffold_247:1634607-1634707	101	30.5	9	nid2_NM_001097263_+_scaffold_247:1597501-1643229@INTRON_17,
scaffold_151:112736-120759	scaffold_151:117986-118086	101	30.2	9	lin54_NM_001079122_-_scaffold_151:90197-153035@INTRON_8,
scaffold_17:1137134-1163956	scaffold_17:1146884-1147034	151	29	9	sgsm1_NM_001112951_+_scaffold_17:1115830-1186970@INTRON_3,
scaffold_115:857131-874804	scaffold_115:869781-869881	101	44.6	10	klhl32_NM_001016857_-_scaffold_115:771294-916007@INTRON_8,
scaffold_413:764598-767857	scaffold_413:767298-767398	101	32.5	10	galnt14_NM_001078901_+_scaffold_413:536416-769069@INTRON_13,
scaffold_146:1348335-1356485	scaffold_146:1349185-1349285	101	31.5	10	vrk3_NM_001044457_+_scaffold_146:1334063-1378280@INTRON_4,
scaffold_247:1633157-1639535	scaffold_247:1637407-1637507	101	31.3	10	nid2_NM_001097263_+_scaffold_247:1597501-1643229@INTRON_17,
scaffold_789:312256-393729	scaffold_789:317106-317206	101	30.2	10	zc3h3_NM_001044484_+_scaffold_789:312056-393959@INTRON_1,
scaffold_135:1214666-1417655	scaffold_135:1236966-1237116	151	42.4	11	chd9_NM_001045586_+_scaffold_135:1214575-1809035@INTRON_1,
scaffold_498:655640-662655	scaffold_498:657340-657490	151	40.6	11	dmbt1_NM_001142217_+_scaffold_498:627850-712316@INTRON_4,
scaffold_498:655638-662662	scaffold_498:657338-657488	151	40.4	11	dmbt1_NM_001142217_+_scaffold_498:627814-662860@INTRON_5,
scaffold_498:655632-662656	scaffold_498:657332-657482	151	39.8	11	dmbt1_NM_001142217_+_scaffold_498:627796-662860@INTRON_5,
scaffold_113:862408-870407	scaffold_113:867958-868058	101	62.2	12	fcho2_NM_001142071_+_scaffold_113:832210-902166@INTRON_5,
scaffold_137:1345546-1622175	scaffold_137:1490596-1490696	101	37.6	12	bin1_NM_203900_+_scaffold_137:795532-2340846@INTRON_2,
scaffold_243:237952-243728	scaffold_243:240302-240402	101	35	12	gnptab_NM_001097235_+_scaffold_243:225759-269611@INTRON_5,
scaffold_429:17699-23139	scaffold_429:20499-20649	151	31.2	12	sox13_NM_001017004_-_scaffold_429:14899-129409@INTRON_2,
scaffold_917:210144-225902	scaffold_917:217544-217644	101	61.7	13	arhgef10l_NM_001127901_-_scaffold_917:156027-248367@INTRON_19,
scaffold_386:645305-1101085	scaffold_386:1038755-1038905	151	42	13	ifit5_NM_001142188_-_scaffold_386:175917-1101219@INTRON_6,
scaffold_198:1140677-1162470	scaffold_198:1155677-1155777	101	32.1	13	fbxo41_NM_001079043_+_scaffold_198:1125851-1176330@INTRON_2,
scaffold_446:730870-943514	scaffold_446:744420-744520	101	30.6	13	bin1_NM_203900_-_scaffold_446:399955-972588@INTRON_2,
scaffold_17:1137134-1163956	scaffold_17:1144134-1144284	151	41	14	sgsm1_NM_001112951_+_scaffold_17:1115830-1186970@INTRON_3,
scaffold_115:857131-874804	scaffold_115:869931-870031	101	40.6	15	klhl32_NM_001016857_-_scaffold_115:771294-916007@INTRON_8,
scaffold_17:1137134-1163956	scaffold_17:1143534-1143684	151	29	15	sgsm1_NM_001112951_+_scaffold_17:1115830-1186970@INTRON_3,
scaffold_154:958812-972051	scaffold_154:964762-964862	101	41.9	16	atp2b3_NM_001131043_+_scaffold_154:878268-1011465@INTRON_6,
scaffold_65:1831410-1935213	scaffold_65:1923710-1923810	101	37.7	16	c16orf45_NM_001142078_-_scaffold_65:1491901-1935285@INTRON_4,
scaffold_137:1345546-1622175	scaffold_137:1600546-1600646	101	34.9	16	bin1_NM_203900_+_scaffold_137:795532-2340846@INTRON_2,
scaffold_95:360285-364815	scaffold_95:360985-361135	151	43.9	17	LOC100145511_NM_001126954_+_scaffold_95:350378-368730@INTRON_12,
scaffold_753:21921-338290	scaffold_753:192171-192271	101	39	17	sult1c4_NM_001011489_+_scaffold_753:3319-338385@INTRON_10,
scaffold_68:2684851-2714697	scaffold_68:2699551-2699701	151	36	17	rtn1_NM_001085350_-_scaffold_68:2677137-2762253@INTRON_6,
scaffold_753:21921-338290	scaffold_753:124321-124421	101	33.5	17	sult1c4_NM_001011489_+_scaffold_753:3319-338385@INTRON_10,
scaffold_89:1056512-1062613	scaffold_89:1058312-1058412	101	30.3	17	larp7_NM_001045703_+_scaffold_89:1052783-1076917@INTRON_2,
scaffold_139:308278-345800	scaffold_139:333578-333728	151	29.7	17	sept8_NM_001122727_+_scaffold_139:308038-361485@INTRON_1,
scaffold_16:1547869-1803167	scaffold_16:1785069-1785169	101	40.1	18	ypel2_NM_001102689_+_scaffold_16:1547739-2300995@INTRON_1,
scaffold_366:1034883-1035733	scaffold_366:1035083-1035233	151	39.3	18	slc47a2_NM_001102970_+_scaffold_366:1008257-1039407@INTRON_8,
scaffold_446:400203-730662	scaffold_446:489503-489603	101	35.7	18	bin1_NM_203900_-_scaffold_446:399955-972588@INTRON_1,
scaffold_45:2160205-2196600	scaffold_45:2191155-2191305	151	35.4	18	reln_NM_001137612_-_scaffold_45:2010419-2256264@INTRON_60,
scaffold_434:193377-219397	scaffold_434:213577-213677	101	33.3	19	nhsl1_NM_001142125_-_scaffold_434:147209-324347@INTRON_4,
scaffold_667:404698-571763	scaffold_667:410998-411098	101	32.4	19	bin1_NM_203900_+_scaffold_667:401087-571869@INTRON_1,
scaffold_959:133277-144334	scaffold_959:133477-133577	101	32.2	19	slc22a15.1_NM_001005012_-_scaffold_959:128523-144498@INTRON_9,
scaffold_110:219419-234179	scaffold_110:226969-227069	101	31	19	glrb_NM_001078787_+_scaffold_110:212736-270336@INTRON_2,
scaffold_1367:21820-29045	scaffold_1367:28670-28770	101	30.1	19	ush1c_NM_001103052_+_scaffold_1367:21767-93721@INTRON_1,
scaffold_95:360285-364815	scaffold_95:362185-362285	101	52.9	20	LOC100145511_NM_001126954_+_scaffold_95:350378-368730@INTRON_12,
scaffold_228:189010-226125	scaffold_228:205210-205310	101	30.7	20	nedd4l_NM_001006726_+_scaffold_228:87196-270238@INTRON_5,
scaffold_291:1247072-1287077	scaffold_291:1285922-1286072	151	28.6	20	tmeff2_NM_001097223_+_scaffold_291:1081209-1292027@INTRON_8,
scaffold_344:725160-732774	scaffold_344:728510-728660	151	45.1	21	LOC100158523_NM_001127960_+_scaffold_344:663538-753973@INTRON_11,
scaffold_127:248539-561605	scaffold_127:372939-373039	101	36.5	21	celf4_NM_001078910_-_scaffold_127:7653-738884@INTRON_11,
scaffold_146:1348335-1356485	scaffold_146:1353785-1353885	101	31.3	22	vrk3_NM_001044457_+_scaffold_146:1334063-1378280@INTRON_4,
scaffold_137:1701617-2340456	scaffold_137:2118517-2118617	101	33.9	24	bin1_NM_203900_+_scaffold_137:795532-2340846@INTRON_5,
scaffold_402:485648-504585	scaffold_402:488098-488198	101	33.6	24	wrb_NM_001006891_+_scaffold_402:460474-506212@INTRON_3,
scaffold_404:967815-970121	scaffold_404:969115-969215	101	31.8	24	shq1_NM_001079148_-_scaffold_404:917994-977269@INTRON_7,
scaffold_105:707861-710409	scaffold_105:709261-709361	101	30.9	24	cir1_NM_001016226_+_scaffold_105:707700-730539@INTRON_1,
scaffold_52:2640695-2655915	scaffold_52:2648595-2648695	101	30.4	25	ispd_NM_001016240_+_scaffold_52:2613821-2686967@INTRON_3,
scaffold_124:485235-505423	scaffold_124:496735-496835	101	40	27	cbl_NM_001128638_+_scaffold_124:472751-524664@INTRON_2,
scaffold_142:1422926-1439121	scaffold_142:1428226-1428326	101	35.8	28	mett10d_NM_001130217_-_scaffold_142:1401348-1440550@INTRON_7,
scaffold_17:1137134-1163956	scaffold_17:1143334-1143434	101	33.5	28	sgsm1_NM_001112951_+_scaffold_17:1115830-1186970@INTRON_3,
scaffold_17:1137134-1163956	scaffold_17:1146684-1146784	101	33	28	sgsm1_NM_001112951_+_scaffold_17:1115830-1186970@INTRON_3,
scaffold_140:1174760-1196345	scaffold_140:1180660-1180760	101	32.5	28	tmeff1_NM_001100268_+_scaffold_140:1093531-1225056@INTRON_5,
scaffold_191:398900-692537	scaffold_191:622300-622400	101	37.5	29	tulp3_NM_001123481_-_scaffold_191:255556-1465506@INTRON_2,
scaffold_213:1400827-1453928	scaffold_213:1415227-1415327	101	36.4	29	lrrc16a_NM_001127140_+_scaffold_213:1393364-1497627@INTRON_2,
scaffold_494:126889-174669	scaffold_494:174239-174339	101	31.6	29	vti1a_NM_001078762_+_scaffold_494:106119-240391@INTRON_2,
scaffold_174:1556648-1584863	scaffold_174:1567598-1567698	101	30.6	29	noxo1_NM_001112986_+_scaffold_174:1463579-1999224@INTRON_4,
scaffold_821:153786-194333	scaffold_821:174336-174436	101	36	31	igsf21_NM_001078772_+_scaffold_821:153666-249814@INTRON_1,
scaffold_113:347783-383094	scaffold_113:374983-375083	101	33.4	31	LOC733866_NM_001045606_+_scaffold_113:346199-387206@INTRON_2,
scaffold_262:141139-149161	scaffold_262:143039-143189	151	24.5	31	eif2a_NM_001127089_-_scaffold_262:135631-167889@INTRON_3,
scaffold_608:415468-440397	scaffold_608:429668-429768	101	36.8	33	plekha6_NM_001097246_+_scaffold_608:401920-654488@INTRON_3,
scaffold_198:1163446-1168972	scaffold_198:1165796-1165896	101	36	33	fbxo41_NM_001079043_+_scaffold_198:1125851-1176330@INTRON_3,
scaffold_508:678396-681622	scaffold_508:679696-679796	101	35.8	33	cyfip2_NM_001110053_-_scaffold_508:672185-726188@INTRON_7,
scaffold_99:746527-986057	scaffold_99:983877-983977	101	36.2	34	LOC100158618_NM_001128034_-_scaffold_99:470628-1073815@INTRON_3,
scaffold_137:1571333-1613652	scaffold_137:1600383-1600483	101	33.9	34	fam69b_NM_001097225_-_scaffold_137:1566465-1625275@INTRON_4,
scaffold_272:1155523-1209211	scaffold_272:1193673-1193773	101	32.7	34	gna14_NM_001008053_+_scaffold_272:1154984-1241076@INTRON_1,
scaffold_531:577710-702863	scaffold_531:600210-600310	101	30.6	34	cables2_NM_001114489_-_scaffold_531:58890-703245@INTRON_4,
scaffold_531:591297-611711	scaffold_531:600297-600397	101	33	36	lama5_NM_001127133_-_scaffold_531:561686-615992@INTRON_54,
scaffold_120:1104884-1224640	scaffold_120:1124284-1124384	101	30.6	37	cdh13_NM_001103078_+_scaffold_120:1104798-1600265@INTRON_1,
scaffold_131:2207820-2225270	scaffold_131:2214220-2214320	101	30.2	37	pdcd6_NM_001008003_-_scaffold_131:2187603-2225400@INTRON_5,
scaffold_576:598979-647892	scaffold_576:645179-645279	101	31.7	39	uhrf1bp1l_NM_001130247_-_scaffold_576:598486-704443@INTRON_1,
scaffold_12:4514753-4516476	scaffold_12:4515153-4515253	101	30.1	39	gstt1_NM_001006810_+_scaffold_12:4511587-4517627@INTRON_3,
scaffold_531:591297-611711	scaffold_531:600447-600547	101	30.3	41	lama5_NM_001127133_-_scaffold_531:561686-615992@INTRON_54,
scaffold_362:583499-609210	scaffold_362:587299-587399	101	32.8	42	btn2a1_NM_001130216_+_scaffold_362:580426-719713@INTRON_2,
scaffold_59:3045562-3047920	scaffold_59:3045962-3046062	101	31.7	42	wdr19_NM_001123477_-_scaffold_59:3026085-3076705@INTRON_19,
scaffold_321:910628-940104	scaffold_321:917778-917878	101	41.8	43	txndc9_NM_001079070_+_scaffold_321:909787-940279@INTRON_1,
scaffold_2:1774377-1792737	scaffold_2:1784027-1784127	101	30.9	43	pms1_NM_001142901_-_scaffold_2:1724336-1805884@INTRON_9,
scaffold_35:880734-885378	scaffold_35:882034-882184	151	37.5	45	cask_NM_001016204_+_scaffold_35:738621-911918@INTRON_20,
scaffold_73:174161-199502	scaffold_73:192311-192461	151	37.5	45	acot7_NM_001078900_-_scaffold_73:172879-284974@INTRON_1,
scaffold_140:1200740-1215495	scaffold_140:1202340-1202490	151	37.5	46	tmeff1_NM_001100268_+_scaffold_140:1093531-1225056@INTRON_8,
scaffold_531:59534-465760	scaffold_531:244434-244534	101	35.6	47	cables2_NM_001114489_-_scaffold_531:58890-703245@INTRON_1,
scaffold_255:499140-523315	scaffold_255:510990-511090	101	41.4	49	gas7_NM_001127048_+_scaffold_255:470544-531011@INTRON_3,
scaffold_501:627409-629259	scaffold_501:627959-628109	151	37.5	49	nusap1_NM_001142902_+_scaffold_501:618444-632268@INTRON_9,
scaffold_41:148571-157587	scaffold_41:150721-150821	101	35.4	49	tulp1_NM_001016482_-_scaffold_41:125078-229182@INTRON_8,
scaffold_166:1685858-1692527	scaffold_166:1691008-1691108	101	31.6	49	tmem229b_NM_001078851_-_scaffold_166:1676257-1696933@INTRON_3,
scaffold_29:2248772-2260692	scaffold_29:2254122-2254222	101	30.2	49	elac2_NM_001045621_+_scaffold_29:2225891-2268827@INTRON_8,
scaffold_554:4160-21822	scaffold_554:9810-9910	101	43.6	50	pcsk5_NM_001079038_-_scaffold_554:4070-92883@INTRON_1,
scaffold_380:356179-369084	scaffold_380:359029-359179	151	26.5	50	kcnmb4_NM_001017211_-_scaffold_380:338400-369481@INTRON_2,
scaffold_35:845261-864998	scaffold_35:853911-854061	151	37.5	51	cask_NM_001016204_+_scaffold_35:738621-911918@INTRON_11,
scaffold_283:645958-649427	scaffold_283:648708-648858	151	36.2	52	atp6v0d1_NM_001017310_-_scaffold_283:638059-708809@INTRON_3,
scaffold_274:522226-541252	scaffold_274:534226-534326	101	37.5	53	fuca2_NM_001011291_+_scaffold_274:521936-557942@INTRON_1,
scaffold_402:485648-504585	scaffold_402:488298-488448	151	34.1	53	wrb_NM_001006891_+_scaffold_402:460474-506212@INTRON_3,
scaffold_247:1633157-1639535	scaffold_247:1638607-1638757	151	33.5	53	nid2_NM_001097263_+_scaffold_247:1597501-1643229@INTRON_17,
scaffold_466:85289-98927	scaffold_466:93789-93889	101	31.1	53	itfg3_NM_001128045_+_scaffold_466:62845-111736@INTRON_5,
scaffold_71:349251-743059	scaffold_71:586851-587001	151	29.8	53	LOC779492_NM_001134807_-_scaffold_71:349196-795262@INTRON_1,
scaffold_99:746527-986057	scaffold_99:897077-897177	101	39.3	54	LOC100158618_NM_001128034_-_scaffold_99:470628-1073815@INTRON_3,
scaffold_415:745067-864516	scaffold_415:825367-825467	101	37.9	54	syt4_NM_001171514_-_scaffold_415:512204-867856@INTRON_2,
scaffold_331:175308-493206	scaffold_331:385358-385458	101	37	54	opcml_NM_001079019_-_scaffold_331:51689-493354@INTRON_2,
scaffold_448:561248-908490	scaffold_448:800748-800848	101	30.8	54	cdkn2d_NM_001079371_+_scaffold_448:537564-908837@INTRON_7,
scaffold_386:645305-1101085	scaffold_386:1037905-1038055	151	32.8	55	ifit5_NM_001142188_-_scaffold_386:175917-1101219@INTRON_6,
scaffold_58:1279953-1694133	scaffold_58:1582703-1582803	101	38.7	56	c16orf57_NM_001127143_-_scaffold_58:1279860-1694372@INTRON_1,
scaffold_291:447209-465196	scaffold_291:453809-453909	101	36.6	56	dnajb11_NM_203849_-_scaffold_291:409790-496794@INTRON_5,
scaffold_498:655640-662655	scaffold_498:657090-657240	151	33	56	dmbt1_NM_001142217_+_scaffold_498:627850-712316@INTRON_4,
scaffold_498:655638-662662	scaffold_498:657088-657238	151	32.9	56	dmbt1_NM_001142217_+_scaffold_498:627814-662860@INTRON_5,
scaffold_498:655632-662656	scaffold_498:657082-657232	151	32	56	dmbt1_NM_001142217_+_scaffold_498:627796-662860@INTRON_5,
scaffold_466:62931-73675	scaffold_466:68781-68881	101	33.8	57	itfg3_NM_001128045_+_scaffold_466:62845-111736@INTRON_1,
scaffold_219:546590-572084	scaffold_219:569040-569140	101	30.7	57	prss23_NM_001113120_+_scaffold_219:546432-573623@INTRON_1,
scaffold_135:129934-137489	scaffold_135:132984-133084	101	39.9	58	map7d2_NM_001079229_+_scaffold_135:96695-161300@INTRON_3,
scaffold_443:134292-157190	scaffold_443:151092-151192	101	30.3	58	ttc39b_NM_001016802_-_scaffold_443:115739-170626@INTRON_17,
scaffold_693:437007-451173	scaffold_693:442807-442907	101	32.9	59	ptpn3_NM_001079462_+_scaffold_693:258466-490908@INTRON_15,
scaffold_508:633164-639630	scaffold_508:635764-635914	151	31.3	60	adam19_NM_001040016_-_scaffold_508:608207-643432@INTRON_19,
scaffold_40:152248-167005	scaffold_40:165148-165248	101	37.8	63	map2k5_NM_001016288_+_scaffold_40:134662-203854@INTRON_8,
scaffold_127:20673-47852	scaffold_127:44873-44973	101	36	63	celf4_NM_001078910_-_scaffold_127:7653-738884@INTRON_3,
scaffold_841:23272-82437	scaffold_841:82172-82272	101	35.5	63	ralyl_NM_001078745_+_scaffold_841:23180-232688@INTRON_1,
scaffold_413:652718-720114	scaffold_413:701368-701468	101	42	64	galnt14_NM_001078901_+_scaffold_413:536416-769069@INTRON_2,
scaffold_194:148970-151844	scaffold_194:150520-150620	101	31.2	64	adprhl2_NM_001016184_+_scaffold_194:141645-156442@INTRON_3,
scaffold_414:508659-517219	scaffold_414:512809-512959	151	23.6	64	mib2_NM_001123444_+_scaffold_414:454095-523005@INTRON_13,
scaffold_502:681043-709567	scaffold_502:691243-691393	151	23.5	64	rassf4_NM_001100272_-_scaffold_502:657142-749539@INTRON_8,
scaffold_152:1104097-1111514	scaffold_152:1109297-1109397	101	42.3	65	sirt4_NM_001045628_+_scaffold_152:1103851-1507544@INTRON_3,
scaffold_9:2310906-3030103	scaffold_9:2601706-2601806	101	30.9	65	cadm2_NM_001005713_+_scaffold_9:2310496-3241766@INTRON_1,
scaffold_704:484350-487694	scaffold_704:486650-486750	101	33.9	68	adad1_NM_001123473_-_scaffold_704:475233-495148@INTRON_5,
scaffold_742:364243-371186	scaffold_742:365843-365943	101	34.7	69	tmbim4_NM_001004879_+_scaffold_742:364111-375553@INTRON_1,
scaffold_346:345819-350418	scaffold_346:347619-347719	101	34.5	69	cdk10_NM_001016575_-_scaffold_346:345200-361702@INTRON_1,
scaffold_119:2541965-2551566	scaffold_119:2550415-2550515	101	30.7	69	ddx10_NM_001102681_+_scaffold_119:2541739-2595489@INTRON_1,
scaffold_1001:37944-44539	scaffold_1001:40444-40544	101	35.8	71	sox6_NM_001123415_+_scaffold_1001:3331-94550@INTRON_3,
scaffold_152:1104097-1111514	scaffold_152:1110997-1111097	101	41.3	72	sirt4_NM_001045628_+_scaffold_152:1103851-1507544@INTRON_3,
scaffold_386:645305-1101085	scaffold_386:1049755-1049855	101	41.3	72	ifit5_NM_001142188_-_scaffold_386:175917-1101219@INTRON_6,
scaffold_824:150682-210155	scaffold_824:195182-195282	101	37.3	72	cables2_NM_001114489_-_scaffold_824:150160-210472@INTRON_1,
scaffold_63:886435-903872	scaffold_63:891235-891335	101	30.2	74	LOC100036663_NM_001097217_-_scaffold_63:876524-911486@INTRON_7,
scaffold_118:804765-933145	scaffold_118:817565-817665	101	35.1	76	fam189a1_NM_001078904_+_scaffold_118:804096-1122860@INTRON_1,
scaffold_42:102332-108364	scaffold_42:105132-105282	151	23.2	76	cul4a_NM_001015893_-_scaffold_42:88808-121952@INTRON_10,
scaffold_666:319889-406169	scaffold_666:347589-347689	101	35.2	77	ncam2_NM_001127425_+_scaffold_666:319753-476644@INTRON_1,
scaffold_106:84779-503722	scaffold_106:218979-219079	101	35	77	slc39a3_NM_001102697_-_scaffold_106:83848-2455684@INTRON_4,
scaffold_13:3160394-3254301	scaffold_13:3232344-3232444	101	33.7	77	dach1_NM_001078708_+_scaffold_13:3159588-3365066@INTRON_1,
scaffold_113:347783-383094	scaffold_113:382683-382783	101	33.7	77	LOC733866_NM_001045606_+_scaffold_113:346199-387206@INTRON_2,
scaffold_90:93446-289130	scaffold_90:96896-96996	101	33.3	77	syt4_NM_001171514_-_scaffold_90:93400-289196@INTRON_1,
scaffold_194:148970-151844	scaffold_194:150220-150320	101	33.4	78	adprhl2_NM_001016184_+_scaffold_194:141645-156442@INTRON_3,
scaffold_612:326623-340674	scaffold_612:335073-335173	101	30.9	78	fam118b_NM_001005046_-_scaffold_612:325999-373583@INTRON_1,
scaffold_84:2080108-2115611	scaffold_84:2091058-2091158	101	30.3	78	greb1l_NM_001130279_+_scaffold_84:2079841-2154461@INTRON_1,
scaffold_281:579862-617015	scaffold_281:612062-612162	101	41.6	79	tspan18_NM_001100203_-_scaffold_281:576840-648915@INTRON_7,
scaffold_848:143387-143804	scaffold_848:143587-143687	101	38.4	81	kalrn_NM_001016029_-_scaffold_848:142692-172014@INTRON_1,
scaffold_255:1149404-1520158	scaffold_255:1364054-1364154	101	33.3	81	tbxas1_NM_001171526_-_scaffold_255:1149227-1520937@INTRON_1,
scaffold_1001:9157-197737	scaffold_1001:40457-40557	101	32.7	82	bin1_NM_203900_+_scaffold_1001:2522-198268@INTRON_2,
scaffold_162:264279-266803	scaffold_162:266629-266729	101	33.3	83	rps6_NM_203821_+_scaffold_162:260990-268062@INTRON_3,
scaffold_315:95995-122169	scaffold_315:107695-107795	101	32.9	84	LOC496764_NM_001011309_-_scaffold_315:93089-133380@INTRON_5,
scaffold_213:1482043-1489167	scaffold_213:1483093-1483193	101	30.5	84	lrrc16a_NM_001127140_+_scaffold_213:1393364-1497627@INTRON_16,
scaffold_5:4489661-4654623	scaffold_5:4519061-4519161	101	33.1	85	ifit5_NM_001142188_-_scaffold_5:4404167-4654764@INTRON_3,
scaffold_41:59181-96024	scaffold_41:65881-65981	101	32.9	85	smpd2_NM_001126737_-_scaffold_41:15656-96096@INTRON_10,
scaffold_255:1041049-1056643	scaffold_255:1048499-1048599	101	34.8	88	pik3r5_NM_001045678_-_scaffold_255:1025846-1057667@INTRON_18,
scaffold_380:242102-252618	scaffold_380:249802-249902	101	33.9	88	ptprr_NM_001103009_+_scaffold_380:169719-253233@INTRON_13,
scaffold_693:396017-414306	scaffold_693:409917-410017	101	31.8	88	ptpn3_NM_001079462_+_scaffold_693:258466-490908@INTRON_9,
scaffold_868:267219-279696	scaffold_868:272169-272269	101	41.4	90	ddx10_NM_001102681_-_scaffold_868:265736-327322@INTRON_1,
scaffold_531:465848-558172	scaffold_531:498648-498748	101	37.5	90	cables2_NM_001114489_-_scaffold_531:58890-703245@INTRON_2,
scaffold_642:363293-403476	scaffold_642:392193-392293	101	34.1	92	gc_NM_001017165_-_scaffold_642:355296-403558@INTRON_6,
scaffold_642:363293-403476	scaffold_642:392193-392293	101	34.1	92	gc_NM_001015745_-_scaffold_642:331999-403555@INTRON_12,
scaffold_79:2621157-2633042	scaffold_79:2631657-2631757	101	33.5	95	b4galt1.1_NM_001126960_-_scaffold_79:2604932-2659367@INTRON_4,
scaffold_217:611412-619522	scaffold_217:618312-618462	151	43.7	96	hdhd2_NM_001126620_-_scaffold_217:607925-624213@INTRON_3,
scaffold_491:286098-330911	scaffold_491:298398-298498	101	34.4	97	kcnh5_NM_001127437_+_scaffold_491:213159-358278@INTRON_7,
scaffold_99:746527-986057	scaffold_99:976127-976227	101	38.8	99	LOC100158618_NM_001128034_-_scaffold_99:470628-1073815@INTRON_3,
scaffold_127:561688-738543	scaffold_127:702438-702538	101	34.3	99	celf4_NM_001078910_-_scaffold_127:7653-738884@INTRON_12,
scaffold_79:812233-1375476	scaffold_79:1306233-1306333	101	34.3	100	slc39a3_NM_001102697_+_scaffold_79:680766-2284175@INTRON_2,
scaffold_29:2248772-2260692	scaffold_29:2253622-2253722	101	34.2	101	elac2_NM_001045621_+_scaffold_29:2225891-2268827@INTRON_8,
scaffold_531:59534-465760	scaffold_531:211684-211784	101	34.8	102	cables2_NM_001114489_-_scaffold_531:58890-703245@INTRON_1,
scaffold_531:577710-702863	scaffold_531:600460-600560	101	32	102	cables2_NM_001114489_-_scaffold_531:58890-703245@INTRON_4,
scaffold_893:53598-57198	scaffold_893:55398-55498	101	31.6	102	sox18_NM_001129937_-_scaffold_893:52481-57520@INTRON_1,
scaffold_5:2713065-2733757	scaffold_5:2723665-2723765	101	31.5	102	tmtc2_NM_001102686_+_scaffold_5:2577670-2738408@INTRON_11,
scaffold_824:76189-87399	scaffold_824:86039-86139	101	30	102	tub_NM_001007492_-_scaffold_824:45617-87517@INTRON_10,
scaffold_667:404662-468120	scaffold_667:411012-411112	101	35.3	103	bin1_NM_203900_+_scaffold_667:185672-468547@INTRON_3,
scaffold_531:591297-611711	scaffold_531:600197-600297	101	33.9	104	lama5_NM_001127133_-_scaffold_531:561686-615992@INTRON_54,
scaffold_190:1658215-1943970	scaffold_190:1794815-1794915	101	33.7	104	c3p1_NR_033392_-_scaffold_190:1643590-1945983@INTRON_5,
scaffold_34:3556578-3918839	scaffold_34:3835728-3835828	101	33.9	105	sirt4_NM_001045628_-_scaffold_34:2890969-3918895@INTRON_6,
scaffold_127:248539-561605	scaffold_127:558139-558289	151	40.4	108	celf4_NM_001078910_-_scaffold_127:7653-738884@INTRON_11,
scaffold_491:286098-330911	scaffold_491:296398-296498	101	36.1	110	kcnh5_NM_001127437_+_scaffold_491:213159-358278@INTRON_7,
scaffold_291:1247072-1287077	scaffold_291:1278222-1278322	101	31.1	111	tmeff2_NM_001097223_+_scaffold_291:1081209-1292027@INTRON_8,
scaffold_188:812950-841197	scaffold_188:820650-820750	101	30.2	112	banp_NM_203864_-_scaffold_188:703445-903409@INTRON_5,
scaffold_85:2259055-2268647	scaffold_85:2262855-2262955	101	36.7	113	tada1_NM_001005070_-_scaffold_85:2255571-2299345@INTRON_2,
scaffold_9:2310906-3030103	scaffold_9:2935606-2935706	101	30.4	113	cadm2_NM_001005713_+_scaffold_9:2310496-3241766@INTRON_1,
scaffold_744:92799-95859	scaffold_744:94349-94449	101	30.4	113	ppt2_NM_001100218_-_scaffold_744:84436-103576@INTRON_4,
scaffold_1393:70911-76360	scaffold_1393:75911-76011	101	33.8	119	uxs1_NM_001006848_-_scaffold_1393:56287-76718@INTRON_10,
scaffold_34:920777-927629	scaffold_34:922227-922327	101	31.3	121	epb49_NM_001015862_+_scaffold_34:913149-931499@INTRON_8,
scaffold_310:953740-1084948	scaffold_310:972640-972740	101	31.1	127	shisa9_NM_001112925_+_scaffold_310:905309-1094386@INTRON_2,
scaffold_213:1664246-1708295	scaffold_213:1689946-1690046	101	30.5	129	pard6g_NM_001017338_+_scaffold_213:1643597-1711180@INTRON_2,
scaffold_244:1044616-1059142	scaffold_244:1055366-1055466	101	30.5	129	LOC100170569_NM_001130346_+_scaffold_244:1044538-1338765@INTRON_1,
scaffold_96:43575-56810	scaffold_96:54725-54825	101	33.5	130	stk3_NM_001097196_-_scaffold_96:13523-135736@INTRON_2,
scaffold_745:307168-440183	scaffold_745:355818-355918	101	30.2	131	slc47a2_NM_001102970_-_scaffold_745:306883-440449@INTRON_1,
scaffold_531:577710-702863	scaffold_531:598160-598260	101	40.9	132	cables2_NM_001114489_-_scaffold_531:58890-703245@INTRON_4,
scaffold_79:2621157-2633042	scaffold_79:2625607-2625757	151	33.8	132	b4galt1.1_NM_001126960_-_scaffold_79:2604932-2659367@INTRON_4,
scaffold_139:667166-681034	scaffold_139:670016-670166	151	32.7	134	arhgap26_NM_001126773_+_scaffold_139:533849-810043@INTRON_14,
scaffold_511:81391-105420	scaffold_511:97741-97891	151	31.9	137	homer2_NM_001016054_+_scaffold_511:50185-138050@INTRON_2,
scaffold_6:5923174-5934115	scaffold_6:5931274-5931424	151	30	139	itfg1_NM_001017040_+_scaffold_6:5894391-5934238@INTRON_8,
scaffold_79:812233-1375476	scaffold_79:1056133-1056283	151	29.9	139	slc39a3_NM_001102697_+_scaffold_79:680766-2284175@INTRON_2,
scaffold_990:161299-170261	scaffold_990:162299-162399	101	39	141	parvb_NM_001005624_+_scaffold_990:161129-182654@INTRON_1,
scaffold_106:1587520-1602002	scaffold_106:1598120-1598220	101	30.1	161	ccdc21_NM_001126536_+_scaffold_106:1570291-1602473@INTRON_8,
scaffold_578:571597-667011	scaffold_578:605147-605247	101	33.7	162	LOC733855_NM_001045601_+_scaffold_578:490506-667922@INTRON_4,
scaffold_105:2616215-2619010	scaffold_105:2617515-2617615	101	31.2	167	mettl5_NM_001030492_+_scaffold_105:2615859-2624024@INTRON_2,
scaffold_578:571597-667011	scaffold_578:605347-605447	101	31.2	167	LOC733855_NM_001045601_+_scaffold_578:490506-667922@INTRON_4,
scaffold_1393:70911-76360	scaffold_1393:75711-75811	101	31.2	167	uxs1_NM_001006848_-_scaffold_1393:56287-76718@INTRON_10,
scaffold_269:910482-958036	scaffold_269:948082-948182	101	30.7	168	pdss2_NM_001008169_-_scaffold_269:849289-959185@INTRON_7,
scaffold_79:1631046-1680578	scaffold_79:1665846-1665946	101	30.2	171	slc39a3_NM_001102697_+_scaffold_79:680766-2284175@INTRON_8,
scaffold_421:722262-724349	scaffold_421:723012-723112	101	32.7	173	ttc35_NM_001011398_+_scaffold_421:699230-736516@INTRON_9,
scaffold_331:175308-493206	scaffold_331:231908-232008	101	32.2	173	opcml_NM_001079019_-_scaffold_331:51689-493354@INTRON_2,
scaffold_160:2043270-2089040	scaffold_160:2060820-2060920	101	32.1	203	ubac2_NM_001172293_+_scaffold_160:2036782-2110980@INTRON_4,
scaffold_26:2471076-3027687	scaffold_26:2813526-2813626	101	31.7	207	c1qtnf4_NM_001011345_-_scaffold_26:2470905-3738113@INTRON_1,
scaffold_380:242102-252618	scaffold_380:248502-248602	101	30.6	209	ptprr_NM_001103009_+_scaffold_380:169719-253233@INTRON_13,
scaffold_448:561248-908490	scaffold_448:874998-875098	101	30.1	209	cdkn2d_NM_001079371_+_scaffold_448:537564-908837@INTRON_7,
scaffold_123:2243904-2519751	scaffold_123:2294804-2294904	101	32.4	215	gatad1_NM_001170506_+_scaffold_123:2243843-2573111@INTRON_1,
scaffold_319:622432-651839	scaffold_319:632432-632532	101	32.5	217	dlg1_NM_001045651_-_scaffold_319:569766-679639@INTRON_20,
scaffold_27:3218755-3491978	scaffold_27:3397605-3397705	101	31.9	221	gdpd5_NM_001127121_+_scaffold_27:1776726-3883646@INTRON_9,
scaffold_106:919420-1309606	scaffold_106:1096420-1096520	101	32.4	222	slc39a3_NM_001102697_-_scaffold_106:83848-2455684@INTRON_7,
scaffold_161:1081652-1213089	scaffold_161:1184102-1184202	101	30.1	225	pde1b_NM_001097267_-_scaffold_161:1040549-1225323@INTRON_14,
scaffold_130:1214865-1217348	scaffold_130:1216965-1217065	101	31.6	230	ccnt1_NM_001129933_-_scaffold_130:1210237-1226483@INTRON_1,
scaffold_86:620240-757373	scaffold_86:633740-633840	101	31.3	231	ptprd_NM_001126889_+_scaffold_86:472567-1283803@INTRON_3,
scaffold_841:23272-82437	scaffold_841:69572-69672	101	33.7	257	ralyl_NM_001078745_+_scaffold_841:23180-232688@INTRON_1,
scaffold_269:910482-958036	scaffold_269:947882-947982	101	33.7	259	pdss2_NM_001008169_-_scaffold_269:849289-959185@INTRON_7,
scaffold_466:62931-73675	scaffold_466:65981-66081	101	34.1	272	itfg3_NM_001128045_+_scaffold_466:62845-111736@INTRON_1,
scaffold_186:885898-1268142	scaffold_186:1158998-1159098	101	33.8	272	LOC549932_NM_001017178_-_scaffold_186:804103-1268179@INTRON_3,
scaffold_86:1625606-1637888	scaffold_86:1629056-1629156	101	33.5	272	kdm4c_NM_001112998_-_scaffold_86:1605645-1715329@INTRON_7,
scaffold_34:4086852-4132362	scaffold_34:4123552-4123652	101	33.2	274	rftn1_NM_001113084_-_scaffold_34:3959959-4153862@INTRON_7,
scaffold_20:2523211-2649807	scaffold_20:2607811-2607911	101	34	275	LOC100124962_NM_001102899_-_scaffold_20:2391477-2650233@INTRON_3,
scaffold_343:158368-181270	scaffold_343:165268-165368	101	33.9	275	fzr1_NM_001126529_-_scaffold_343:89124-181396@INTRON_11,
scaffold_5:5759398-6142373	scaffold_5:6038598-6038698	101	33.4	275	dis3l2_NM_001079336_+_scaffold_5:5759292-6164148@INTRON_2,
scaffold_3:4262755-4267822	scaffold_3:4266105-4266205	101	34	276	prkci_NM_001012689_+_scaffold_3:4237318-4277970@INTRON_10,
scaffold_244:1108985-1336918	scaffold_244:1239235-1239335	101	34	276	LOC100170569_NM_001130346_+_scaffold_244:1044538-1338765@INTRON_3,
scaffold_16:1958218-2300589	scaffold_16:2226868-2226968	101	33.7	276	ypel2_NM_001102689_+_scaffold_16:1547739-2300995@INTRON_4,
scaffold_599:138827-145278	scaffold_599:143827-143927	101	33.7	276	ube2j1_NM_001011167_-_scaffold_599:126311-145317@INTRON_7,
scaffold_1021:30384-45028	scaffold_1021:38134-38234	101	31.5	276	erlin1_NM_001016892_-_scaffold_1021:28721-125814@INTRON_2,
scaffold_17:5006005-5010785	scaffold_17:5010005-5010105	101	31.5	343	pxn_NM_001142032_-_scaffold_17:4986579-5025954@INTRON_9,
scaffold_127:561688-738543	scaffold_127:703288-703388	101	31.6	345	celf4_NM_001078910_-_scaffold_127:7653-738884@INTRON_12,
scaffold_744:92799-95859	scaffold_744:94599-94699	101	31.5	345	ppt2_NM_001100218_-_scaffold_744:84436-103576@INTRON_4,
scaffold_149:1179243-1189850	scaffold_149:1187643-1187743	101	30.3	364	evi5l_NM_001127128_+_scaffold_149:1167608-1198118@INTRON_11,
scaffold_26:3167773-3737968	scaffold_26:3539023-3539123	101	31.6	392	c1qtnf4_NM_001011345_-_scaffold_26:2470905-3738113@INTRON_3,
scaffold_429:295949-325649	scaffold_429:317249-317349	101	31.7	408	taf11_NM_001127413_+_scaffold_429:295852-390708@INTRON_1,
scaffold_1336:17975-30126	scaffold_1336:23025-23125	101	30.7	419	utp6_NM_001016855_+_scaffold_1336:6641-30692@INTRON_14,
scaffold_448:561248-908490	scaffold_448:880748-880848	101	31.9	431	cdkn2d_NM_001079371_+_scaffold_448:537564-908837@INTRON_7,
scaffold_534:585847-591518	scaffold_534:587047-587147	101	32	434	slc7a6_NM_001017197_-_scaffold_534:552467-595455@INTRON_9,
scaffold_579:263368-274056	scaffold_579:267568-267668	101	32	434	homer1_NM_001113132_+_scaffold_579:235660-277965@INTRON_5,
scaffold_424:593059-645299	scaffold_424:606159-606259	101	31.7	434	slc10a7_NM_001004977_+_scaffold_424:559161-675367@INTRON_4,
scaffold_213:1482043-1489167	scaffold_213:1482593-1482693	101	32.1	435	lrrc16a_NM_001127140_+_scaffold_213:1393364-1497627@INTRON_16,
scaffold_95:2187255-2290652	scaffold_95:2213255-2213355	101	32	436	tmem132d_NM_001113104_+_scaffold_95:2100100-2543069@INTRON_3,
scaffold_120:1104884-1224640	scaffold_120:1123534-1123634	101	32	436	cdh13_NM_001103078_+_scaffold_120:1104798-1600265@INTRON_1,
scaffold_74:2728215-2738331	scaffold_74:2734315-2734415	101	31.9	439	hnrpll_NM_001127432_+_scaffold_74:2728043-2765631@INTRON_1,
scaffold_186:885898-1268142	scaffold_186:1159448-1159548	101	31.7	439	LOC549932_NM_001017178_-_scaffold_186:804103-1268179@INTRON_3,
scaffold_409:311446-320153	scaffold_409:319046-319146	101	31.7	439	pld3_NM_001011023_-_scaffold_409:307611-326345@INTRON_6,
scaffold_413:652718-720114	scaffold_413:717268-717368	101	45.1	443	galnt14_NM_001078901_+_scaffold_413:536416-769069@INTRON_2,
scaffold_34:3556578-3918839	scaffold_34:3673378-3673478	101	31.6	470	sirt4_NM_001045628_-_scaffold_34:2890969-3918895@INTRON_6,
scaffold_962:150847-172957	scaffold_962:161947-162047	101	31.2	482	slc26a9_NM_001102740_+_scaffold_962:150749-206133@INTRON_1,
scaffold_19:2806310-2855805	scaffold_19:2832360-2832460	101	31.4	483	sirt4_NM_001045628_-_scaffold_19:2806221-3055736@INTRON_1,
scaffold_244:1018688-1086439	scaffold_244:1055388-1055488	101	31.3	483	ccar1_NM_001142204_+_scaffold_244:1002975-1098742@INTRON_11,
scaffold_343:158368-181270	scaffold_343:165718-165818	101	31.1	483	fzr1_NM_001126529_-_scaffold_343:89124-181396@INTRON_11,
scaffold_18:4050443-4064148	scaffold_18:4063093-4063193	101	31	484	phtf1_NM_001123489_-_scaffold_18:4025544-4070588@INTRON_13,
scaffold_16:1958218-2300589	scaffold_16:2227318-2227418	101	30.4	484	ypel2_NM_001102689_+_scaffold_16:1547739-2300995@INTRON_4,
scaffold_893:209197-234224	scaffold_893:221797-221897	101	42.5	534	bin1_NM_203900_-_scaffold_893:176176-234345@INTRON_13,

## Sheet: Stage 18 Upstream
Upstream Region	Cluster Region	Cluster Length (nt)	Mean Cluster Density	Number of clusters in genome	Gene Annotation (RefSeq)
scaffold_1831:27342-32342	scaffold_1831:28992-29142	151	36	0	dmbt1_NM_001142217_-_scaffold_1831:22450-27342@UPSTREAM,
scaffold_2:6369036-6374036	scaffold_2:6370336-6370436	101	32.5	0	phf10_NM_001030472_-_scaffold_2:6342312-6369036@UPSTREAM,
scaffold_49:2246050-2251050	scaffold_49:2249400-2249550	151	63.8	1	psmc1_NM_001045689_+_scaffold_49:2251050-2260216@UPSTREAM,
scaffold_49:2248884-2253884	scaffold_49:2249384-2249534	151	63.2	1	mrps10_NM_001016991_-_scaffold_49:2242003-2248884@UPSTREAM,
scaffold_107:91430-96430	scaffold_107:93880-94030	151	58.3	1	sgcb_NM_001142012_-_scaffold_107:68305-91430@UPSTREAM,
scaffold_328:300999-305999	scaffold_328:302799-302949	151	56.5	1	mep1a_NM_001015767_-_scaffold_328:279657-300999@UPSTREAM,
scaffold_950:181510-186510	scaffold_950:185310-186260	951	55.4	1	ctr9_NM_001005076_-_scaffold_950:165206-181510@UPSTREAM,
scaffold_55:209250-214250	scaffold_55:210150-210300	151	55.3	1	rnf7_NM_001114261_-_scaffold_55:205134-209250@UPSTREAM,
scaffold_4346:2984-7984	scaffold_4346:6734-6884	151	53.3	1	LOC100145508_NM_001126952_+_scaffold_4346:7984-8765@UPSTREAM,
scaffold_811:295784-300784	scaffold_811:299584-299684	101	53.1	1	LOC100379536_NM_001173439_+_scaffold_811:300784-306760@UPSTREAM,
scaffold_10:3569605-3574605	scaffold_10:3573405-3573555	151	52.4	1	rlim_NM_001016091_+_scaffold_10:3574605-3586219@UPSTREAM,
scaffold_546:622185-627185	scaffold_546:622935-623185	251	50.5	1	hdac3_NM_001016883_-_scaffold_546:604752-622185@UPSTREAM,
scaffold_274:1191503-1196503	scaffold_274:1193853-1194053	201	49.6	1	serinc1_NM_001011399_-_scaffold_274:1180633-1191503@UPSTREAM,
scaffold_550:481977-486977	scaffold_550:486377-486527	151	47.9	1	rpp30_NM_001016584_-_scaffold_550:457229-481977@UPSTREAM,
scaffold_536:148054-153054	scaffold_536:150904-151054	151	45.9	1	blvra_NM_001006895_+_scaffold_536:153054-160867@UPSTREAM,
scaffold_409:349267-354267	scaffold_409:353317-353417	101	45.3	1	c19orf47_NM_001005016_+_scaffold_409:354267-363935@UPSTREAM,
scaffold_481:538873-543873	scaffold_481:541623-541723	101	44.8	1	ccdc97_NM_001016433_+_scaffold_481:543873-547664@UPSTREAM,
scaffold_591:482482-487482	scaffold_591:486682-486832	151	44.8	1	aip_NM_001102749_-_scaffold_591:412964-482482@UPSTREAM,
scaffold_290:1199290-1204290	scaffold_290:1201490-1201740	251	44.7	1	t2r9_NM_001172001_-_scaffold_290:1198390-1199290@UPSTREAM,
scaffold_154:1490811-1495811	scaffold_154:1491311-1491461	151	44.4	1	hsd17b10_NM_001016511_-_scaffold_154:1487319-1490811@UPSTREAM,
scaffold_31:1314581-1319581	scaffold_31:1315931-1316081	151	43.3	1	mospd1_NM_001015761_-_scaffold_31:1291301-1314581@UPSTREAM,
scaffold_123:682036-687036	scaffold_123:682786-682886	101	43	1	grwd1_NM_203937_-_scaffold_123:676441-682036@UPSTREAM,
scaffold_278:684752-689752	scaffold_278:685802-685902	101	42	1	tnip1_NM_001079235_-_scaffold_278:634613-684752@UPSTREAM,
scaffold_415:867856-872856	scaffold_415:871506-871756	251	41.5	1	syt4_NM_001171514_-_scaffold_415:512204-867856@UPSTREAM,
scaffold_470:870001-875001	scaffold_470:870151-870351	201	41.3	1	dnajc27_NM_001102684_-_scaffold_470:869859-870001@UPSTREAM,
scaffold_76:2210151-2215151	scaffold_76:2214101-2214201	101	41	1	LOC100135092_NM_001113831_+_scaffold_76:2215151-2259554@UPSTREAM,
scaffold_598:136837-141837	scaffold_598:139987-140137	151	41	1	tmx2_NM_001005010_-_scaffold_598:89833-136837@UPSTREAM,
scaffold_950:179408-184408	scaffold_950:180058-180508	451	40.8	1	ctr9_NM_001005076_-_scaffold_950:179271-179408@UPSTREAM,
scaffold_2:1388272-1393272	scaffold_2:1388822-1388922	101	39.6	1	rnf216_NM_001016834_-_scaffold_2:1275208-1388272@UPSTREAM,
scaffold_190:1103642-1108642	scaffold_190:1103992-1104242	251	39.5	1	LOC550107_NM_001017353_-_scaffold_190:1097528-1103642@UPSTREAM,
scaffold_283:1461845-1466845	scaffold_283:1465345-1465495	151	39.4	1	tox3_NM_001128012_+_scaffold_283:1466845-1467150@UPSTREAM,
scaffold_1015:101623-106623	scaffold_1015:104623-104773	151	39.3	1	limd1_NM_001016606_-_scaffold_1015:85750-101623@UPSTREAM,
scaffold_106:2010336-2015336	scaffold_106:2011236-2011386	151	38.8	1	gpn2_NM_001030474_-_scaffold_106:2007598-2010336@UPSTREAM,
scaffold_90:2039152-2044152	scaffold_90:2041702-2041902	201	38.4	1	ing2_NM_001017044_+_scaffold_90:2044152-2046784@UPSTREAM,
scaffold_229:110683-115683	scaffold_229:113833-113933	101	38.4	1	adh6_NM_001011423_+_scaffold_229:115683-136134@UPSTREAM,
scaffold_229:110683-115683	scaffold_229:114783-114933	151	38.3	1	adh6_NM_001011423_+_scaffold_229:115683-136134@UPSTREAM,
scaffold_332:677626-682626	scaffold_332:681376-681526	151	38	1	ankrd9_NM_001102746_-_scaffold_332:673828-677626@UPSTREAM,
scaffold_742:116279-121279	scaffold_742:118729-118929	201	37.9	1	tmem5_NM_001126976_+_scaffold_742:121279-128566@UPSTREAM,
scaffold_255:465544-470544	scaffold_255:466794-467044	251	37.7	1	gas7_NM_001127048_+_scaffold_255:470544-531011@UPSTREAM,
scaffold_267:1322191-1327191	scaffold_267:1324391-1324541	151	37.7	1	slc13a2_NM_001008097_+_scaffold_267:1327191-1351788@UPSTREAM,
scaffold_414:739003-744003	scaffold_414:743553-743703	151	37.7	1	nadk.1_NM_001004896_-_scaffold_414:698065-739003@UPSTREAM,
scaffold_75:1249420-1254420	scaffold_75:1251920-1252120	201	37.6	1	tspan14_NM_001007870_-_scaffold_75:1224623-1249420@UPSTREAM,
scaffold_429:835807-840807	scaffold_429:837207-837457	251	37.6	1	LOC100037835_NM_001114850_-_scaffold_429:832402-835807@UPSTREAM,
scaffold_264:719483-724483	scaffold_264:722783-722933	151	36.8	1	LOC100124851_NM_001102813_+_scaffold_264:724483-731938@UPSTREAM,
scaffold_279:1335668-1340668	scaffold_279:1339568-1339718	151	36.5	1	dusp23_NM_001011371_+_scaffold_279:1340668-1342208@UPSTREAM,
scaffold_2508:8918-13918	scaffold_2508:11668-12018	351	36.5	1	fam166b_NM_001112981_+_scaffold_2508:13918-15623@UPSTREAM,
scaffold_80:1996100-2001100	scaffold_80:1998150-1998250	101	36.4	1	hmgb1_NM_203895_+_scaffold_80:2001100-2009791@UPSTREAM,
scaffold_392:94274-99274	scaffold_392:96024-96274	251	36.1	1	enam_NM_001145743_+_scaffold_392:99274-115320@UPSTREAM,
scaffold_4346:2984-7984	scaffold_4346:6634-6734	101	35.4	1	LOC100145508_NM_001126952_+_scaffold_4346:7984-8765@UPSTREAM,
scaffold_37:507387-512387	scaffold_37:508087-508187	101	35	1	egln3_NM_001127012_+_scaffold_37:512387-519055@UPSTREAM,
scaffold_75:1249420-1254420	scaffold_75:1252220-1252370	151	34.8	1	tspan14_NM_001007870_-_scaffold_75:1224623-1249420@UPSTREAM,
scaffold_23:3503979-3508979	scaffold_23:3506179-3506279	101	34.7	1	ube2g1_NM_203720_-_scaffold_23:3472492-3503979@UPSTREAM,
scaffold_201:419758-424758	scaffold_201:422508-422658	151	34.7	1	ptp4a1_NM_001008022_+_scaffold_201:424758-430299@UPSTREAM,
scaffold_164:844421-849421	scaffold_164:845421-845621	201	34.6	1	atp5j_NM_001017042_-_scaffold_164:838752-844421@UPSTREAM,
scaffold_769:83286-88286	scaffold_769:86586-86786	201	34.6	1	wdr67_NM_001005061_+_scaffold_769:88286-108513@UPSTREAM,
scaffold_332:677626-682626	scaffold_332:681126-681226	101	34.4	1	ankrd9_NM_001102746_-_scaffold_332:673828-677626@UPSTREAM,
scaffold_366:1005305-1010305	scaffold_366:1009355-1009505	151	34.3	1	slc47a2_NM_001102970_+_scaffold_366:1010305-1016197@UPSTREAM,
scaffold_923:243710-248710	scaffold_923:245810-245910	101	34	1	crk_NM_001006107_-_scaffold_923:230370-243710@UPSTREAM,
scaffold_2508:8918-13918	scaffold_2508:12118-12318	201	34	1	fam166b_NM_001112981_+_scaffold_2508:13918-15623@UPSTREAM,
scaffold_693:253466-258466	scaffold_693:254016-254166	151	33.9	1	ptpn3_NM_001079462_+_scaffold_693:258466-490908@UPSTREAM,
scaffold_5871:5162-10162	scaffold_5871:5362-5462	101	33.9	1	LOC100158514_NM_001127951_-_scaffold_5871:0-5162@UPSTREAM,
scaffold_255:510174-515174	scaffold_255:514024-514174	151	33.3	1	gas7_NM_001127048_+_scaffold_255:515174-515306@UPSTREAM,
scaffold_218:1310991-1315991	scaffold_218:1312141-1312241	101	32.9	1	sumo3_NM_001004853_+_scaffold_218:1315991-1323056@UPSTREAM,
scaffold_58:816306-821306	scaffold_58:817156-817256	101	32.8	1	fam172a_NM_001004971_-_scaffold_58:563728-816306@UPSTREAM,
scaffold_255:510174-515174	scaffold_255:510974-511124	151	32.6	1	gas7_NM_001127048_+_scaffold_255:515174-515306@UPSTREAM,
scaffold_380:951140-956140	scaffold_380:953440-953590	151	32.6	1	rap1b_NM_001008194_-_scaffold_380:917465-951140@UPSTREAM,
scaffold_170:1963806-1968806	scaffold_170:1965606-1965706	101	32.5	1	c19orf40_NM_001016122_-_scaffold_170:1960110-1963806@UPSTREAM,
scaffold_356:1025768-1030768	scaffold_356:1028618-1028718	101	32.3	1	u2af2_NM_001016998_-_scaffold_356:1015366-1025768@UPSTREAM,
scaffold_396:246937-251937	scaffold_396:246937-247037	101	32.2	1	hla-drb1_NM_001045794_+_scaffold_396:251937-305972@UPSTREAM,
scaffold_396:246936-251936	scaffold_396:246936-247036	101	32.2	1	LOC100145090_NM_001126609_+_scaffold_396:251936-305975@UPSTREAM,
scaffold_699:142819-147819	scaffold_699:145769-145919	151	32.1	1	lgi2_NM_001102924_+_scaffold_699:147819-169791@UPSTREAM,
scaffold_429:835807-840807	scaffold_429:838007-838107	101	31.9	1	LOC100037835_NM_001114850_-_scaffold_429:832402-835807@UPSTREAM,
scaffold_742:310446-315446	scaffold_742:313246-313346	101	31.9	1	nxt2_NM_001126661_+_scaffold_742:315446-319562@UPSTREAM,
scaffold_889:98111-103111	scaffold_889:102211-102311	101	31.8	1	ftsj3_NM_001078960_+_scaffold_889:103111-125828@UPSTREAM,
scaffold_255:465544-470544	scaffold_255:466344-466544	201	31.6	1	gas7_NM_001127048_+_scaffold_255:470544-531011@UPSTREAM,
scaffold_255:510174-515174	scaffold_255:513874-514024	151	31.6	1	gas7_NM_001127048_+_scaffold_255:515174-515306@UPSTREAM,
scaffold_742:308447-313447	scaffold_742:313247-313347	101	31.6	1	rpl18a_NM_001016690_-_scaffold_742:301684-308447@UPSTREAM,
scaffold_799:147238-152238	scaffold_799:148388-148538	151	31.6	1	slco2b1_NM_001102959_+_scaffold_799:152238-191311@UPSTREAM,
scaffold_39:1399473-1404473	scaffold_39:1401873-1402023	151	31	1	apoa4_NM_001008098_+_scaffold_39:1404473-1407228@UPSTREAM,
scaffold_15794:628-5628	scaffold_15794:4578-4678	101	30.8	1	padi2_NM_001103020_-_scaffold_15794:508-628@UPSTREAM,
scaffold_154:1490811-1495811	scaffold_154:1491061-1491211	151	30.7	1	hsd17b10_NM_001016511_-_scaffold_154:1487319-1490811@UPSTREAM,
scaffold_356:1025813-1030813	scaffold_356:1028613-1028713	101	30.7	1	u2af2_NM_001001217_-_scaffold_356:1015122-1025813@UPSTREAM,
scaffold_310:258530-263530	scaffold_310:261280-261380	101	30.5	1	ntan1_NM_001126824_-_scaffold_310:246372-258530@UPSTREAM,
scaffold_396:246924-251924	scaffold_396:246924-247024	101	30.5	1	LOC100145508_NM_001126952_+_scaffold_396:251924-306229@UPSTREAM,
scaffold_1136:113940-118940	scaffold_1136:117190-117290	101	30.5	1	rbpms_NM_001171852_+_scaffold_1136:118940-119296@UPSTREAM,
scaffold_1237:41911-46911	scaffold_1237:45911-46011	101	30.5	1	LOC100145082_NM_001126602_-_scaffold_1237:16022-41911@UPSTREAM,
scaffold_351:661535-666535	scaffold_351:661985-662135	151	30.4	1	hamp2_NM_001097261_+_scaffold_351:666535-670164@UPSTREAM,
scaffold_279:1335668-1340668	scaffold_279:1339418-1339518	101	30.3	1	dusp23_NM_001011371_+_scaffold_279:1340668-1342208@UPSTREAM,
scaffold_799:147238-152238	scaffold_799:148188-148338	151	30.3	1	slco2b1_NM_001102959_+_scaffold_799:152238-191311@UPSTREAM,
scaffold_274:1191503-1196503	scaffold_274:1192903-1193003	101	30	1	serinc1_NM_001011399_-_scaffold_274:1180633-1191503@UPSTREAM,
scaffold_108:2715079-2720079	scaffold_108:2717529-2717679	151	29.7	1	fblim1_NM_001078804_-_scaffold_108:2709255-2715079@UPSTREAM,
scaffold_74:206355-211355	scaffold_74:210555-210705	151	29.6	1	acat2_NM_203634_+_scaffold_74:211355-225018@UPSTREAM,
scaffold_799:147238-152238	scaffold_799:149488-149638	151	29.2	1	slco2b1_NM_001102959_+_scaffold_799:152238-191311@UPSTREAM,
scaffold_1237:41911-46911	scaffold_1237:45661-45811	151	28.8	1	LOC100145082_NM_001126602_-_scaffold_1237:16022-41911@UPSTREAM,
scaffold_799:147238-152238	scaffold_799:149938-150088	151	28.6	1	slco2b1_NM_001102959_+_scaffold_799:152238-191311@UPSTREAM,
scaffold_2:1388272-1393272	scaffold_2:1389822-1389972	151	28.1	1	rnf216_NM_001016834_-_scaffold_2:1275208-1388272@UPSTREAM,
scaffold_491:22692-27692	scaffold_491:24642-24792	151	25.4	1	ppp2r5e_NM_203922_+_scaffold_491:27692-75543@UPSTREAM,
scaffold_70:153494-158494	scaffold_70:156644-156794	151	24.3	1	rwdd3_NM_001017275_+_scaffold_70:158494-168490@UPSTREAM,
scaffold_47:1587338-1592338	scaffold_47:1591138-1591288	151	23	1	prtfdc1_NM_001102892_+_scaffold_47:1592338-1612561@UPSTREAM,
scaffold_74:206355-211355	scaffold_74:210355-210505	151	50.2	2	acat2_NM_203634_+_scaffold_74:211355-225018@UPSTREAM,
scaffold_5964:4665-9665	scaffold_5964:4915-5065	151	36.9	2	akr1c4_NM_001011079_-_scaffold_5964:436-4665@UPSTREAM,
scaffold_396:246937-251937	scaffold_396:247937-248037	101	32.5	2	hla-drb1_NM_001045794_+_scaffold_396:251937-305972@UPSTREAM,
scaffold_470:132490-137490	scaffold_470:134940-135040	101	32.5	2	fzd3_NM_001129910_-_scaffold_470:85326-132490@UPSTREAM,
scaffold_396:246936-251936	scaffold_396:247936-248036	101	32.4	2	LOC100145090_NM_001126609_+_scaffold_396:251936-305975@UPSTREAM,
scaffold_414:739003-744003	scaffold_414:743403-743503	101	31.9	2	nadk.1_NM_001004896_-_scaffold_414:698065-739003@UPSTREAM,
scaffold_609:61791-66791	scaffold_609:66141-66241	101	31	2	acer3_NM_001112966_-_scaffold_609:42907-61791@UPSTREAM,
scaffold_950:179408-184408	scaffold_950:180558-180658	101	36.7	3	ctr9_NM_001005076_-_scaffold_950:179271-179408@UPSTREAM,
scaffold_243:1371156-1376156	scaffold_243:1375206-1375306	101	32.8	3	cdc23_NM_001016759_+_scaffold_243:1376156-1386510@UPSTREAM,
scaffold_1219:12015-17015	scaffold_1219:16065-16215	151	32.3	3	rnf168_NM_001126497_+_scaffold_1219:17015-26994@UPSTREAM,
scaffold_117:854724-859724	scaffold_117:856274-856374	101	39.6	4	nono_NM_205829_+_scaffold_117:859724-869366@UPSTREAM,
scaffold_15:4222779-4227779	scaffold_15:4226079-4226229	151	36.8	4	pde1a_NM_001102974_+_scaffold_15:4227779-4386231@UPSTREAM,
scaffold_609:61791-66791	scaffold_609:66291-66441	151	36.1	4	acer3_NM_001112966_-_scaffold_609:42907-61791@UPSTREAM,
scaffold_638:218772-223772	scaffold_638:219572-219672	101	32.3	5	aqp3_NM_001016845_-_scaffold_638:200480-218772@UPSTREAM,
scaffold_3931:1-2365	scaffold_3931:51-151	101	31.8	5	thbs3_NM_001011401_+_scaffold_3931:2365-9419@UPSTREAM,
scaffold_253:1164278-1169278	scaffold_253:1164978-1165128	151	32	6	nipa2_NM_001011172_-_scaffold_253:1152903-1164278@UPSTREAM,
scaffold_959:130357-135357	scaffold_959:133707-133807	101	31.6	6	MGC76326_NM_203805_+_scaffold_959:135357-138593@UPSTREAM,
scaffold_89:1047783-1052783	scaffold_89:1052133-1052233	101	33.3	7	larp7_NM_001045703_+_scaffold_89:1052783-1076917@UPSTREAM,
scaffold_1:495412-500412	scaffold_1:499162-499262	101	32.2	8	dmap1_NM_001005440_-_scaffold_1:463007-495412@UPSTREAM,
scaffold_1219:12015-17015	scaffold_1219:15865-16015	151	29.2	8	rnf168_NM_001126497_+_scaffold_1219:17015-26994@UPSTREAM,
scaffold_1299:44783-49783	scaffold_1299:45533-45683	151	25.3	8	nup43_NM_001016144_+_scaffold_1299:49783-78350@UPSTREAM,
scaffold_33:4089194-4094194	scaffold_33:4090744-4090844	101	40.1	10	rnf144b_NM_001113670_+_scaffold_33:4094194-4131895@UPSTREAM,
scaffold_379:465655-470655	scaffold_379:469405-469505	101	31.3	10	foxh1_NM_001017084_+_scaffold_379:470655-482950@UPSTREAM,
scaffold_512:683773-688773	scaffold_512:686673-686823	151	29.9	11	tmem167b_NM_001016348_+_scaffold_512:688773-697204@UPSTREAM,
scaffold_742:116279-121279	scaffold_742:119229-119329	101	31.8	12	tmem5_NM_001126976_+_scaffold_742:121279-128566@UPSTREAM,
scaffold_274:1191503-1196503	scaffold_274:1193503-1193603	101	31.7	12	serinc1_NM_001011399_-_scaffold_274:1180633-1191503@UPSTREAM,
scaffold_49:3247920-3252920	scaffold_49:3252370-3252470	101	32.4	17	LOC100037835_NM_001114850_-_scaffold_49:3245757-3247920@UPSTREAM,
scaffold_512:683773-688773	scaffold_512:686923-687023	101	32.5	18	tmem167b_NM_001016348_+_scaffold_512:688773-697204@UPSTREAM,
scaffold_1601:20700-25700	scaffold_1601:24150-24300	151	33.9	19	c1orf89_NM_001016685_-_scaffold_1601:17715-20700@UPSTREAM,
scaffold_742:363467-368467	scaffold_742:366067-366167	101	31.9	19	xpot_NM_001142243_-_scaffold_742:336366-363467@UPSTREAM,
scaffold_136:932604-937604	scaffold_136:936154-936254	101	30.4	19	LOC100124941_NM_001102881_-_scaffold_136:922627-932604@UPSTREAM,
scaffold_33:2334431-2339431	scaffold_33:2337431-2337581	151	45.4	20	rbm22_NM_203777_+_scaffold_33:2339431-2351156@UPSTREAM,
scaffold_733:303258-308258	scaffold_733:306508-306658	151	45.2	21	hbe1_NM_001016495_+_scaffold_733:308258-323428@UPSTREAM,
scaffold_466:62098-67098	scaffold_466:65998-66098	101	33.5	21	luc7l_NM_001005458_-_scaffold_466:19145-62098@UPSTREAM,
scaffold_372:143049-148049	scaffold_372:146199-146299	101	31.1	22	chpf2_NM_001142158_+_scaffold_372:148049-148134@UPSTREAM,
scaffold_938:239579-244579	scaffold_938:243279-243379	101	44.8	23	socs6_NM_001102770_-_scaffold_938:227138-239579@UPSTREAM,
scaffold_392:94274-99274	scaffold_392:95824-95924	101	31.5	24	enam_NM_001145743_+_scaffold_392:99274-115320@UPSTREAM,
scaffold_255:1361777-1366777	scaffold_255:1364027-1364127	101	32.9	26	fam18b1_NM_001005091_+_scaffold_255:1366777-1370933@UPSTREAM,
scaffold_113:286876-291876	scaffold_113:290626-290776	151	25.2	27	gtf2h2_NM_001011081_+_scaffold_113:291876-304649@UPSTREAM,
scaffold_936:64493-69493	scaffold_936:66193-66293	101	30.4	31	dpp9_NM_001122790_+_scaffold_936:69493-89956@UPSTREAM,
scaffold_48:636849-641849	scaffold_48:640899-640999	101	30.5	37	pard6b_NM_001128639_-_scaffold_48:612998-636849@UPSTREAM,
scaffold_941:211916-216916	scaffold_941:213016-213116	101	32.5	39	LOC733521_NM_001044447_-_scaffold_941:207016-211916@UPSTREAM,
scaffold_372:832348-837348	scaffold_372:834748-834848	101	38.2	43	LOC100145049_NM_001126588_+_scaffold_372:837348-884309@UPSTREAM,
scaffold_828:321268-326268	scaffold_828:321768-321868	101	34.3	50	eln2_NM_001142826_+_scaffold_828:326268-349273@UPSTREAM,
scaffold_71:585626-590626	scaffold_71:586826-586976	151	37.5	51	rab9a_NM_001079169_-_scaffold_71:573962-585626@UPSTREAM,
scaffold_372:832348-837348	scaffold_372:835098-835198	101	37	52	LOC100145049_NM_001126588_+_scaffold_372:837348-884309@UPSTREAM,
scaffold_18523:2171-7171	scaffold_18523:2671-2821	151	37.2	53	cfh_NM_203887_-_scaffold_18523:1102-2171@UPSTREAM,
scaffold_267:714974-719974	scaffold_267:716224-716324	101	31.1	53	dph1_NM_001142155_+_scaffold_267:719974-847113@UPSTREAM,
scaffold_346:672580-677580	scaffold_346:677430-677530	101	36.8	54	dynlrb2_NM_001016395_-_scaffold_346:669019-672580@UPSTREAM,
scaffold_248:1478263-1483263	scaffold_248:1480563-1480663	101	31.9	55	chac2_NM_001017137_-_scaffold_248:1468658-1478263@UPSTREAM,
scaffold_24:4368816-4373816	scaffold_24:4371166-4371266	101	33.6	65	hspa9_NM_001001229_+_scaffold_24:4373816-4414020@UPSTREAM,
scaffold_410:311840-316840	scaffold_410:315390-315490	101	34.5	69	mex3d_NM_001123472_-_scaffold_410:309520-311840@UPSTREAM,
scaffold_15:4222779-4227779	scaffold_15:4226329-4226429	101	40.6	72	pde1a_NM_001102974_+_scaffold_15:4227779-4386231@UPSTREAM,
scaffold_849:314211-319211	scaffold_849:317361-317461	101	35.3	76	znf326_NM_001016086_-_scaffold_849:298360-314211@UPSTREAM,
scaffold_419:1011750-1016750	scaffold_419:1013550-1013650	101	35.1	76	MGC147133_NM_001079159_+_scaffold_419:1016750-1021318@UPSTREAM,
scaffold_305:884643-889643	scaffold_305:887293-887393	101	34.3	77	chmp2a_NM_001005008_-_scaffold_305:879550-884643@UPSTREAM,
scaffold_18:2546027-2551027	scaffold_18:2550777-2550877	101	30	77	rhoc_NM_001016569_-_scaffold_18:2512029-2546027@UPSTREAM,
scaffold_531:494444-499444	scaffold_531:498644-498744	101	36.8	87	osbpl2_NM_205832_+_scaffold_531:499444-531362@UPSTREAM,
scaffold_320:287409-292409	scaffold_320:290209-290309	101	31.8	88	c3orf23_NM_001016864_-_scaffold_320:274515-287409@UPSTREAM,
scaffold_425:878701-883701	scaffold_425:882301-882401	101	33.5	90	ccdc127_NM_001016568_+_scaffold_425:883701-891078@UPSTREAM,
scaffold_596:236370-241370	scaffold_596:236420-236570	151	23.5	98	e2f3_NM_001011109_+_scaffold_596:241370-251788@UPSTREAM,
scaffold_35:1181645-1186645	scaffold_35:1182545-1182645	101	33.8	99	cxorf38_NM_001127142_+_scaffold_35:1186645-1193458@UPSTREAM,
scaffold_223:669593-674593	scaffold_223:673693-673793	101	33.2	99	c1orf212_NM_001016019_+_scaffold_223:674593-678708@UPSTREAM,
scaffold_103:2781602-2786602	scaffold_103:2785852-2785952	101	34.2	101	chkb_NM_001126676_-_scaffold_103:2769288-2781602@UPSTREAM,
scaffold_1393:76718-81718	scaffold_1393:77568-77668	101	33.8	115	uxs1_NM_001006848_-_scaffold_1393:56287-76718@UPSTREAM,
scaffold_69:1320345-1325345	scaffold_69:1324045-1324145	101	34.1	119	wbp2nl_NM_001113925_+_scaffold_69:1325345-1334233@UPSTREAM,
scaffold_35:1181645-1186645	scaffold_35:1182345-1182445	101	33.2	124	cxorf38_NM_001127142_+_scaffold_35:1186645-1193458@UPSTREAM,
scaffold_31:1076471-1081471	scaffold_31:1078271-1078371	101	30.3	124	LOC100127779_NM_001113099_+_scaffold_31:1081471-1092049@UPSTREAM,
scaffold_411:775644-780644	scaffold_411:779844-779944	101	30.1	124	zmym4_NM_001129925_-_scaffold_411:716067-775644@UPSTREAM,
scaffold_466:396827-401827	scaffold_466:398327-398477	151	31.4	138	dhrs7b_NM_001078778_+_scaffold_466:401827-424456@UPSTREAM,
scaffold_357:975625-980625	scaffold_357:979825-979925	101	33.1	168	LOC100216102_NM_001142084_-_scaffold_357:973764-975625@UPSTREAM,
scaffold_228:1676571-1681571	scaffold_228:1677421-1677521	101	30.3	206	zfr_NM_001011177_+_scaffold_228:1681571-1712011@UPSTREAM,
scaffold_222:984761-989761	scaffold_222:984911-985011	101	31.5	233	slc25a29_NM_001102721_+_scaffold_222:989761-1007781@UPSTREAM,
scaffold_699:142819-147819	scaffold_699:145569-145669	101	34	257	lgi2_NM_001102924_+_scaffold_699:147819-169791@UPSTREAM,
scaffold_320:287409-292409	scaffold_320:290409-290509	101	33.5	259	c3orf23_NM_001016864_-_scaffold_320:274515-287409@UPSTREAM,
scaffold_31:1076471-1081471	scaffold_31:1078471-1078571	101	34	274	LOC100127779_NM_001113099_+_scaffold_31:1081471-1092049@UPSTREAM,
scaffold_669:125315-130315	scaffold_669:128165-128265	101	31.6	345	znf674_NM_001045611_-_scaffold_669:122672-125315@UPSTREAM,
scaffold_586:613544-618544	scaffold_586:615994-616094	101	31.5	345	wdr24_NM_001142066_-_scaffold_586:594516-613544@UPSTREAM,
scaffold_664:483152-488152	scaffold_664:486102-486202	101	31.7	434	dpepe_NM_001016448_-_scaffold_664:473957-483152@UPSTREAM,
scaffold_279:1335668-1340668	scaffold_279:1339918-1340018	101	39.5	445	dusp23_NM_001011371_+_scaffold_279:1340668-1342208@UPSTREAM,
scaffold_105:51508-56508	scaffold_105:54308-54408	101	31.7	470	agps_NM_001126829_+_scaffold_105:56508-180470@UPSTREAM,
scaffold_1336:32631-37631	scaffold_1336:33081-33181	101	31.5	478	suz12_NM_001078824_+_scaffold_1336:37631-57617@UPSTREAM,
